# Supplementary material for: Polygenic risk scores predict diabetes complications and their response to intensive blood pressure and glucose control
Source: PubMed Central journal article supplement (PMC8382653; doi:10.1007/s00125-021-05491-7), 2021-07-06
Supplement: 125_2021_5491_MOESM1_ESM.pdf [file 125_2021_5491_MOESM1_ESM.pdf]

## **Electronic Supplementary Material**

### **Polygenic risk score predicts diabetic complications and their response to intensive blood pressure and glucose control**

**J. Tremblay, M. Haloui, R. Attaoua, R. Tahir, C. Hishmih, F. Harvey, F.-C. Marois-Blanchet, C. Long, P. Simon, L. Santucci, C. Hizel, J. Chalmers, M. Marre, S. Harrap, R. Cífková, A. Krajčoviechová, D. Matthews, B. Williams, N. Poulter, S. Zoungas, S. Colagiuri, G. Mancia, D.E. Grobbee, A. Rodgers, L. Liu, M. Agbessi, V. Bruat, M-J. Favé, M. Harwood, P. Awadalla, M. Woodward, J. Hussin, and P. Hamet**

**Table of Contents**

*Supplementary Methods* ..... 3

*Supplementary Tables* ..... 10

*ESM Table 1: Characteristics of ADVANCE and UK Biobank (UKBB) diabetic participants of European descent at baseline.*..... 11

*ESM Table 2: SNPs are selected from literature and divided into 10 risk/outcome groups of complications of T2D.* ..... 12

*ESM Table 3: List of 598 SNPs included in our model.*..... 13

*ESM Table 4: Effect of adding treatment assignment as a covariate on the performance of the multiPRS model.* ..... 31

*ESM Table 5: Effect of individual wPRS, combined 10wPRS and 10wPRS + PC1 on prevalent and incident cases determined by single wPRS.* ..... 32

*ESM Table 6: AUC with confidence intervals for multiPRS model compared to ADVANCE and Framingham clinical scores.* ..... 33

*ESM Table 7: Continuous net reclassification index adding the multiPRS to Framingham & ADVANCE clinical risk scores.* ..... 34

*Supplementary Figures* ..... 35

*ESM Fig. 1: Flow of selection of individuals with T2D of UK Biobank (UKBB) and number of cases and controls for stroke, myocardial infarction, low eGFR and macroalbuminuria analyses.*..... 36

*ESM Fig. 2: Stepwise approach for selection of SNPs included in the 10 wPRS.* ..... 37

*ESM Fig. 3: Prediction model construction and testing in ADVANCE and UKBB and validation in three independent cohorts of patients with T2D.* ..... 39

*ESM Fig. 4: Population structure of the study cohorts using principal component analysis projection.* ..... 40

*ESM Fig. 5: Hosmer-Lemeshow test.*..... 42

*ESM Fig. 6: Cumulative hazard plots of all cause and cardiovascular death stratified by multiPRS thirds in standard and intensive blood pressure (left) and glucose (right) treatment arms.* ..... 43

*ESM Fig. 7: Cumulative hazard plots of ESRD stratified by multiPRS thirds in standard and intensive glucose treatment arm.* ..... 44

*Supplementary References* ..... 45

## Supplementary Methods

Combination of hundreds of polymorphisms, whether or not combined with clinical features constitute a novel approach to develop polygenic risk scores.(1)

We applied this technology and tested it on samples from ADVANCE trial and of the UK Biobank of which detailed study methods have been published elsewhere.(2,3)

## **Patient cohorts**

*ADVANCE* was a 2x2 factorial design, randomized controlled trial of blood pressure (BP) lowering (perindopril-indapamide vs placebo) and intensive glucose control (gliclazide MR-based intensive intervention with a target of 6.5 (48 mmol/mol) HbA1c vs standard care) in patients with T2D (NCT 00145925). A total of 11,140 participants were recruited from 215 centers in 20 countries. They were older than 55 years and diagnosed with T2D after the age of 30 years. The trial was successful in decreasing total and cardiovascular mortality by attenuation of combined microvascular and macrovascular primary outcome with blood pressure control (4) and renal events and all-cause death with combined control of blood glucose and blood pressure.(5) *ADVANCE-ON* was a 5-year post-trial observational extension of *ADVANCE* conducted in 80% of subjects.(6) Here, we studied a subset of 4,098 genotyped T2D patients of European descent from *ADVANCE*.

*UK Biobank*: This study is part of projects 49731 and 59642.(3) The UK Biobank study started in 2006 and, until 2010, recruited more than 500,000 participants from the general UK population, aged between 40-69 at recruitment (identified as white British ancestry subset by self-declaration (Field ID 21000)). We selected 18,853 individuals with diabetes diagnosed by a doctor (Field ID 2443). To avoid potential individuals with type 1 diabetes, we excluded individuals whose age at diagnosis of diabetes was less than 30 years old (Field ID 2976) and obtained 17,604 individuals with T2D of white British origin confirmed genetically by principal component analysis (ESM Fig. 1). Phenotype data collected included year of birth (Field ID 34), age at recruitment (Field ID 21022), sex (Field ID 31), genetic sex (Field ID 22001), genetic ethnic grouping (Field ID 22006), diabetes diagnosed by doctor (Field ID 2443), age diabetes diagnosed (Field ID 2976), age when attended assessment centre (Field ID 21003). These last 2 phenotypes allowed us to calculate the duration of diabetes (derived phenotype). We also, collected data related to stroke (age stroke diagnosed in Field ID 4056), date of ischaemic stroke (Field ID 42008), date of stroke (Field ID 42006), source of ischaemic stroke report (Field ID 42009) and, source of stroke report (Field ID 42007)) and, myocardial infarction (age heart attack diagnosed (Field ID 3894), date of nstemi (Field ID 42004), date of stemi (Field ID 42002), date of myocardial infarction (Field ID 42000),

source of nstemi report (Field ID 42005), source of stemi report (Field ID 42003), source of myocardial infarction report (Field ID 42001) and, vascular heart problems diagnosed by doctor (Field ID 6150)). To calculate UACR and eGFR (using CKD-Epi formula), it was necessary to obtain creatinine plasma and urinary levels (Field ID 30510), microalbuminuria (Field ID 30500) and creatininuria (Field ID 30700). For systolic blood pressure, we used the automated reading (Field ID 4080), same for diastolic blood pressure (Field ID 4079), medications blood pressure or diabetes or exogenous hormones (Field ID 6153), and medications for cholesterol, blood pressure or diabetes (Field ID 6177) were used to define hypertensive participants.

The *Czech post-MONICA* study was a cross-sectional survey investigating the determinants of cardiovascular risk factors in a 1% random sample, stratified by age and gender, of the general population in nine districts of the Czech Republic. A total of 3,612 individuals aged 25–64 years were examined in 2007–2009 as previously reported.(7) 502 individuals were genotyped and among those, 106 had albuminuria.

*Clinpradia* study (NCT 01907958) was a multicenter study to evaluate the management of microalbuminuria in hypertensive patients with T2D in Canada. Its primary objective was to assess the impact of a point-of-care testing for urine albumin excretion on treatment of hypertensive T2D patients as measured by blood pressure levels and albuminuria in the context of primary care setting. The study was performed in 2013-2014. 230 patients with T2D were recruited (mean age 67 years old) in general practice clinics of Ontario and Quebec in Canada and followed for a period of 18 months. Forty percent of these 230 participants had albuminuria at study entry.

The *Canadian Partnership for Tomorrow's Project* (CPTP, [partnershipfortomorrow.ca](http://partnershipfortomorrow.ca)) of CANPATH brings together five Canadian regional cohorts: British Columbia Generations Project, Alberta's Tomorrow Project, Ontario Health Study, CARTaGENE (Quebec)(8) and the Atlantic Partnership for Tomorrow's Health. 10,802 subjects have been genotyped up to now and 601 had T2D. 488 (mean age 58 years old) were used to calculate the AUCs for myocardial infarction (28 cases) and stroke (8 cases) after filtering for European origin, no missing data, no mismatch. Controls were defined as T2D individuals with no complications.

## **Statistical analyses**

Descriptive summary statistics were computed, using frequencies (%) for categorical variables and mean ( $\pm$ SD) for continuous variables. A binomial test was used to compare the two proportions of categorical

variables. AUCs with 95% confidence interval were calculated by fitting the multivariable logistic regression over the PRS, including genetically determined ethnicity (PC1). ADVANCE and Framingham risk scores were computed on ADVANCE trial subjects as was done in other studies.(9) Three groups of risk (low, medium, and high) were determined using unsupervised complete hierarchical clustering algorithm on a Euclidian distance matrix of our score predicted risk values in R. Heatmaps were constructed using R heatmap.2 from gplots library.(10,11)

We also divided the study participants into equal deciles along increasing multiPRS values and then thirds representing equal number of individuals carrying *low*, *medium*, or *high* multiPRS values, thirds of age strata and thirds of age of onset of diabetes and analysed the predictive performance of these strata on total and cardiovascular death, micro-and macrovascular events, myocardial infarction and stroke events. A proportion trend test(12) was used to calculate the trend p-values of the stratified data. We used the pROC package in R for the analysis of ROC curves.(13) The areas under the receiver operating characteristics (ROC) curves (AUCs; 95% confidence intervals), calculated from the predicted risks derived from the regression models, were used to assess the predictive performance of the PRS and the two clinical risk scores. The DeLong method was used to calculate the p-value for the comparison of two AUCs of ROC curves.(14) MultiPRS thirds and treatment effects were examined through cumulative hazards curves with the use of Cox proportional hazard models. For participants with more than one outcome event during follow-up, survival time to the first relevant end point was used in each analysis. Participants were censored at the date of their death or for those still alive at the end of the follow-up.(4) The log-rank test was used to compare the cumulative hazards and the plots are shown over the period of 9.5 years (ADVANCE-ON) to examine post-trial effects of the intensive blood pressure-lowering and the intensive glucose therapies on cardiovascular death, all cause death, and end-stage renal disease in the three genetic risk groups. The Hosmer–Lemeshow test is used to test for goodness of fit of multiPRS in logistic regression models. The test assesses whether the observed event rates match expected event rates in subgroups of the model population. The subgroups analyzed are sex and ethnicity.

### **Genotyping and imputation**

Genotyping of the ADVANCE samples was performed using the Affymetrix Genome-Wide Human SNP Arrays 5.0 or 6.0 or the Affymetrix UK BioBank Axiom arrays (Affymetrix, Santa Clara, California, USA) following standard protocols recommended by the manufacturer. A quality control filtering step was applied to the genotype calls as described in our previous work.(15) Additional quality control steps

included coarse-grain stratification to ensure an European ancestry ratio of more than 0.8 (STRUCTURE software)(16), a genetic relatedness check to ensure independent samples (PLINK) and a sex check to ensure genetic accuracy and database integrity.(17)

Quality control was also performed on the final genotypes to remove any SNPs with more than 4% of missing values across the entire cohort and any samples with more than 2% of missing SNP genotypes. A more stringent threshold was used for any SNPs with between 1 and 5% minor allele frequencies (MAF). Low MAF SNPs with more than 1% of missing values were removed prior to the imputation. 4098 samples passed these quality filters.

Three sets of imputation were performed separately for the individuals of ADVANCE who were genotyped either on Affymetrix arrays 5.0, 6.0 or UK Biobank using SHAPEIT(18), IMPUTE2 software,(19) and the 1000 Genomes project(20,21) phase 3 data set as reference. Only SNPs with an imputation quality score greater than or equal to 0.80 were kept as proposed in other studies.(22) Samples of Clinpradia and Post-Monica were imputed with the IMPUTE2 software using the 1000 Genomes project phase 3 data as reference. The samples from the UKBB were imputed with a combination of 1000 Genomes project phase 3, UK10K and Haplotype reference Consortium. Genotypes data within bgen files were converted to Plink2 files (.pgen, .psam, .pvar). Alleles doses of each SNP of interest in T2D patients were obtained from traw files. The traw files were obtained through the conversion of Plink 2 files using the command “--export A-transpose”. Alleles doses were weighted by the corresponding regression coefficients (betas) issued from literature or from the ADVANCE model. A few of the 598 SNPs were not available in UKBB database, proxies SNPs were obtained using the LDproxy tool within LDlink webtool (<https://ldlink.nci.nih.gov/?tab=ldproxy>).

A subset of 34,570 independent SNPs common to all three microchips was selected to perform a principal component (PC)(4) analysis for the ADVANCE study participants of European origin using the EIGENSOFT 3.0 package.(23) The first principal component (PC1) separated the 4098 individuals along a geographical gradient from East (Balto-Slavic) to West (Germano-Celtic) Europe as described previously.(15) Individual PC1 values were added as co-variates in the logistic regression model.

### **Stepwise approach for selection of SNPs associated to risk factors of complications of T2D**

We selected 26 factors of complications of T2D that we divided into 10 wPRS as initially suggested by Ibrahim-Verbaas(9) and modified as described in ESM Table 2. The 10 wPRS include SNPs associated to diabetes, obesity, blood pressure, albuminuria, GFR, biomarker levels, lipids, stroke, cardiovascular,

and birth weight. We identified most of the GWAS that were reported in the NHGRI-EBI GWAS Catalog and using HuGE navigator we extracted all SNPs together with their p values and effect size ( $\beta$ ) for the 26 factors listed in ESM Table 3. We also performed manual literature curation and included additional SNPs by relaxing p-values threshold of associations if they had evidence of independent replication and/or were reported in meta-analyses published by major GWAS Consortia for blood pressure, renal function, stroke and lipids. We then defined LD blocks and identified genotyped and imputed tag SNPs (SNPs that are in LD with the lead SNP contained in the block at  $R^2 \geq 0.8$ ) using the HapMap CEU samples from 1000 Genomes phase 3. We matched these tag SNPs with SNPs in our genotype database. When a tag SNPs could not be found in ADVANCE, the LD threshold was relaxed to  $R^2 \geq 0.7$  and closest LD proxy was selected. If no tag SNP could be found, the LD block was removed from analysis. When several SNPs within a class of risk factors were in the same loci, we selected the top SNP with the best  $P$  value. In some cases, a SNP was associated with more than one trait and it was thus included in more than one risk groups. We identified a total of 598 SNPs (ESM Tables 2 and 3). Their rs number, genomic position, risk group to which they belong and the published reference which describe them are included in ESM Table 3. Our stepwise strategy for selection of SNPs to be included in the multiPRS is illustrated in ESM Fig. 2 and 3.

### **Creation of the multiPRS model**

To create a multiPRS, we constructed, at first, a weighted polygenic risk score (wPRS) for each of the 10 risk groups over all study participants to evaluate the effect of the 598 SNPs (ESM Table 2). We used the additive model, assuming that each SNP is independently associated with risk, to construct wPRS (different SNPs contribute with different weights to the PRS value) according to the effect size ( $\beta$ ) attributed to the tested SNPs in the original association study (ESM Fig. 3).

We calculated wPRS for these predictors, as previously described, by summing the product of the number of risk alleles for each patient by the effect size of those SNPs i.e.  $wPRS_i^k = \sum_{j=1}^m X_{ij}^k \times \beta_j^k$ , where  $X_{ij}^k$  is the allele frequency of  $i^{th}$  subject in  $j^{th}$  SNP for  $k^{th}$  phenotype and  $\beta$  is the effect size of the phenotype. The effect size attributed to each of the 598 SNPs was obtained from the same group of complications or risk factors. As an example, the effect size of a SNP associated to diabetes was used in the generation of the PRS-Diabetes only. If the same SNP was also shown to be associated to albuminuria in meta-analyses, the effect size used in the other PRS was the one from the original meta-analysis of albuminuria and not the effect size derived from the meta-analysis of diabetes. Variants in five genes



(TCF7L2, ADCY5, FTO, GCKR and HNF1A) were used in two PRS. The number of SNP is not the same for the 26 predictors as well as the unit used, so the wPRS had to be scaled by the sum of its effect coefficients and multiplied by the number of loci of that specific trait.(24) With this scaling, each risk predictor will have an equivalent weight at an equivalent number of loci (ESM Fig. 3). 10 wPRS for ten risk groups of these 26 predictors were combined with sex, age at diagnosis, diabetes duration, and the first PC (PC1) of geo-ethnicity and used as variables in the logistic regression to predict the risk of T2D complications (ESM Fig. 3).

## Supplementary Tables

**ESM Table 1: Characteristics of ADVANCE and UK Biobank (UKBB) diabetic participants of European descent at baseline.**

| Characteristic                                    | UKBB<br>(n=17,604) | ADVANCE<br>(n=4,098) |
|---------------------------------------------------|--------------------|----------------------|
| Age — yr; Mean (SD)                               | 61 (7)             | 67 (7)               |
| Female sex — n (%)                                | 6283 (35.7)        | 1524 (37.2)          |
| Diagnosis age — yr; Mean (SD)                     | 54 (8)             | 60 (9)               |
| Diabetes duration — yr; Median (SD)               | 5 (2-9)            | 5 (2-10)             |
| BMI — kg/m <sup>2</sup> ; Mean (SD)               | 32 (6)             | 30 (5)               |
| HbA <sub>1c</sub> — %; Mean (SD)                  | 6.89 (1.23)        | 7.31 (1.36)          |
| HbA <sub>1c</sub> — mmol/mol; Mean                | 51.8               | 56.4                 |
| SBP — mmHg; Mean (SD)                             | 142 (17)           | 147 (21)             |
| DBP — mmHg; Mean (SD)                             | 82 (10)            | 82 (11)              |
| History of currently treated hypertension — n (%) | 10566 (60)         | 2635 (64)            |
| eGFR — ml/min/1.73 m <sup>2</sup> ; Median (IQR)  | 91.5 (79.3-98.4)   | 72.9 (61.0-85.7)     |
| eGFR ≥ 90; no (%)                                 | 9223 (55)          | 653 (16)             |
| eGFR 60 to 89; no (%)                             | 6489 (39)          | 2465 (61)            |
| eGFR < 60; no (%)                                 | 1090 (6)           | 956 (23)             |
| UACR — mg/mmol; Median (IQR)                      | 1.55 (0.86-3.63)   | 1.55 (0.70-4.49)     |
| UACR < 3.39; no (%)                               | 6714 (73)          | 2702 (70)            |
| UACR 3.39 to 33.9; no (%)                         | 2136 (23)          | 996 (26)             |
| UACR > 33.9; no (%)                               | 306 (3)            | 178 (4)              |

**Abbreviation:** n: Number of patients, Yr: Years, SD: Standard deviation, IQR: Interquartile range. **BMI:** Body mass index, **HbA<sub>1c</sub>:** Glycated hemoglobin, **SBP:** Systolic blood pressure, **DBP:** Diastolic blood pressure, **eGFR:** Estimated glomerular filtration rate based on CKD-EPI formula, **UACR:** Urinary albumin creatinine ratio.

ESM Table 2: SNPs are selected from literature and divided into 10 risk/outcome groups of complications of T2D.

| Risk/Outcome group       | 26 factors                                                                                                                                        | Included SNPs | Reference number |
|--------------------------|---------------------------------------------------------------------------------------------------------------------------------------------------|---------------|------------------|
| <b>Diabetes</b>          | Type 2 Diabetes, Glycated hemoglobin                                                                                                              | <b>45</b>     | 25-31            |
| <b>Obesity</b>           | Body mass index, Waist circumference, Waist hip ratio                                                                                             | <b>80</b>     | 32-35            |
| <b>Albuminuria</b>       | Microalbuminuria, Urinary albumin creatinine ratio                                                                                                | <b>33</b>     | 36               |
| <b>GFR</b>               | Estimated glomerular filtration rate, Plasma creatinine                                                                                           | <b>50</b>     | 37-41            |
| <b>BP</b>                | Hypertension, Pulse pressure, Systolic blood pressure                                                                                             | <b>82</b>     | 42-45            |
| <b>Biomarkers levels</b> | C-reactive protein, Fibrinogen                                                                                                                    | <b>19</b>     | 46,47            |
| <b>Lipids</b>            | High density lipoprotein, Low density lipoprotein, Total Cholesterol, Triglycerides                                                               | <b>77</b>     | 48               |
| <b>Stroke</b>            | Stroke                                                                                                                                            | <b>43</b>     | 49-57            |
| <b>Cardiovascular</b>    | Atrial fibrillation, Coronary artery calcification, Coronary artery disease, Coronary Heart disease, Intracranial aneurysm, Myocardial infarction | <b>115</b>    | 49,56, 58-70     |
| <b>Birth weight</b>      | Birth weight                                                                                                                                      | <b>54</b>     | 71               |
| <b>Total SNPs</b>        |                                                                                                                                                   | <b>598</b>    |                  |

SNPs are selected from the listed references as adapted from the model described by Ibrahim-Verbaas CA.(9)

**Abbreviation: GFR:** Glomerular filtration rate, **BP:** Blood pressure.

ESM Table 3: List of 598 SNPs included in our model.

| Risk Group | Original SNP | Chr | Position of original SNP (GRCh37) | Locus (Gene)           | Functional Consequence | Alleles |       | EAF  | European ancestry values as published |          | Present in ADVANCE? | Best ADVANCE Proxy | ADVANCE Effect Allele | Risk Factor | Ref  | Nb. of Ind |
|------------|--------------|-----|-----------------------------------|------------------------|------------------------|---------|-------|------|---------------------------------------|----------|---------------------|--------------------|-----------------------|-------------|------|------------|
|            |              |     |                                   |                        |                        | Effect  | Other |      | $\beta$                               | p-value  |                     |                    |                       |             |      |            |
| Diabetes   | rs10923931   | 1   | 120455869                         | NOTCH2                 | Intron                 | T       | G     | 0.10 | 0.086                                 | 6.52E-05 | No                  | rs835576           | C                     | T2D         | (25) | 47 117     |
|            | rs2779116    | 1   | 158585415                         | SPTA1                  | Intron                 | T       | C     | 0.27 | 0.020                                 | 2.75E-09 | Yes                 |                    | T                     | HbA1c       | (26) | 34 663     |
|            | rs340874     | 1   | 214159256                         | PROX1, PROX1-AS1       | Intron                 | C       | T     | 0.50 | 0.068                                 | 7.20E-10 | Yes                 |                    | C                     | T2D         | (27) | 127 677    |
|            | rs7578597    | 2   | 43732823                          | THADA                  | Exon non-syn.          | T       | C     | 0.91 | 0.140                                 | 4.47E-05 | Yes                 |                    | T                     | T2D         | (25) | 47 117     |
|            | rs243021     | 2   | 60584819                          | LOC105374754-MIR4432HG |                        | A       | G     | 0.46 | 0.086                                 | 2.90E-15 | Yes                 |                    | A                     | T2D         | (25) | 126 456    |
|            | rs7593730    | 2   | 161171454                         | RBMS1                  | Intron                 | C       | T     | 0.80 | 0.104                                 | 3.70E-08 | Yes                 |                    | C                     | T2D         | (28) | 5 643      |
|            | rs552976     | 2   | 169791438                         | ABCB11                 | Intron                 | G       | A     | 0.64 | 0.050                                 | 8.16E-18 | Yes                 |                    | G                     | HbA1c       | (26) | 40 420     |
|            | rs7578326    | 2   | 227020653                         | LOC646736              | Intron                 | A       | G     | 0.64 | 0.113                                 | 1.30E-19 | Yes                 |                    | A                     | T2D         | (25) | 141 454    |
|            | rs1801282    | 3   | 12393125                          | PPARG                  | Exon non-syn.          | C       | G     | 0.86 | 0.131                                 | 8.01E-06 | Yes                 |                    | C                     | T2D         | (25) | 47 117     |
|            | rs4607103    | 3   | 64711904                          | ADAMTS9-AS2            | Intron                 | C       | T     | 0.76 | 0.086                                 | 2.34E-04 | Yes                 |                    | C                     | T2D         | (25) | 47 117     |
|            | rs11708067   | 3   | 123350211                         | ADCY5                  | Intron                 | A       | G     | 0.80 | 0.113                                 | 9.90E-21 | No                  | rs11720108         | C                     | T2D         | (27) | 127 677    |
|            | rs1470579    | 3   | 185529080                         | IGF2BP2                | Intron                 | C       | A     | 0.30 | 0.131                                 | 2.17E-09 | Yes                 |                    | C                     | T2D         | (25) | 47 117     |
|            | rs10010131   | 4   | 6303022                           | WFS1                   | Intron                 | G       | C     | 0.60 | 0.104                                 | 4.59E-07 | No                  | rs1801214          | T                     | T2D         | (25) | 47 117     |
|            | rs7754840    | 6   | 20661250                          | CDKAL1                 | Intron                 | C       | G     | 0.33 | 0.113                                 | 3.11E-15 | Yes                 |                    | C                     | T2D         | (25) | 47 117     |
|            | rs1800562    | 6   | 26123502                          | HFE                    | Exon non-syn.          | G       | A     | 0.94 | 0.060                                 | 2.59E-20 | No                  | rs115740542        | T                     | HbA1c       | (26) | 43 778     |
|            | rs9472138    | 6   | 43809802                          | LOC107986598           | Intron                 | T       | C     | 0.28 | 0.058                                 | 4.00E-06 | No                  | rs9472135          | T                     | T2D         | (29) | 63 537     |
|            | rs2191349    | 7   | 15064309                          | DGKB-AGMO              |                        | T       | G     | 0.50 | 0.058                                 | 1.10E-08 | Yes                 |                    | T                     | T2D         | (27) | 127 677    |
|            | rs864745     | 7   | 28180556                          | JAZF1                  | Intron                 | T       | C     | 0.51 | 0.095                                 | 2.06E-08 | Yes                 |                    | T                     | T2D         | (25) | 47 117     |
|            | rs4607517    | 7   | 44235668                          | GCK-YKT6               |                        | A       | G     | 0.20 | 0.040                                 |          | Yes                 |                    | A                     | HbA1c       | (27) | 127 667    |
|            | rs4607517    | 7   | 44235668                          | GCK-YKT6               |                        | A       | G     | 0.20 | 0.068                                 | 5.00E-08 | Yes                 |                    | A                     | T2D         | (27) | 127 667    |
|            | rs972283     | 7   | 130466854                         | LOC105375508           | Intron                 | A       | G     | 0.55 | 0.095                                 | 4.40E-10 | Yes                 |                    | G                     | T2D         | (25) | 141 454    |
|            | rs4737009    | 8   | 41630405                          | ANK1                   | Intron                 | A       | G     | 0.24 | 0.030                                 | 6.11E-12 | Yes                 |                    | A                     | HbA1c       | (26) | 36 862     |
|            | rs896854     | 8   | 95960511                          | NDUFAF6, TP531INP1     | Intron, 5'UTR          | C       | T     | 0.48 | 0.095                                 | 2.00E-09 | Yes                 |                    | T                     | T2D         | (25) | 141 454    |
|            | rs13266634   | 8   | 118184783                         | SLC30A8                | Exon non-syn.          | A       | G     | 0.30 | 0.019                                 | 4.90E-08 | Yes                 |                    | A                     | HbA1c       | (30) | 14 618     |
|            | rs10811661   | 9   | 22133284                          | CDKN2B-AS1-DMRTA1      |                        | T       | C     | 0.83 | 0.182                                 | 1.45E-10 | No                  | rs10965250         | G                     | T2D         | (25) | 47 117     |
|            | rs13292136   | 9   | 81952128                          | PSAT1-TLE4             |                        | C       | T     | 0.93 | 0.182                                 | 2.80E-08 | Yes                 |                    | C                     | T2D         | (25) | 141 454    |
|            | rs12779790   | 10  | 12328010                          | CDC123-CAMK1D          |                        | G       | A     | 0.20 | 0.104                                 | 6.75E-04 | Yes                 |                    | G                     | T2D         | (25) | 47 117     |
|            | rs1111875    | 10  | 94465559                          | HHEX-EXOC6             |                        | C       | T     | 0.57 | 0.122                                 | 9.10E-15 | No                  | rs5015480          | C                     | T2D         | (25) | 47 117     |
|            | rs2334499    | 11  | 1696849                           | FAM99A-FAM99B          |                        | T       | C     | 0.41 | 0.104                                 | 1.70E-02 | Yes                 |                    | T                     | T2D         | (31) | 2 251      |
|            | rs231362     | 11  | 2691471                           | KCNQ1                  | Intron                 | G       | A     | 0.52 | 0.104                                 | 4.70E-13 | Yes                 |                    | G                     | T2D         | (25) | 141 454    |
|            | rs2237892    | 11  | 2849530                           | KCNQ1                  | Intron                 | C       | T     | 0.94 | 0.131                                 | 2.70E-03 | No                  | rs2283228          | A                     | T2D         | (25) | 47 117     |
|            | rs5215       | 11  | 17405617                          | KCNJ11                 | Exon non-syn.          | C       | T     | 0.41 | 0.104                                 | 1.60E-05 | No                  | rs1002226          | C                     | T2D         | (25) | 47 117     |
| Diabetes   | rs1552224    | 11  | 72428172                          | ARAP1                  | Exon non-coding        | A       | C     | 0.88 | 0.122                                 | 2.90E-22 | No                  | rs76550717         | A                     | T2D         | (25) | 141 454    |

Electronic Supplementary Material J. Tremblay et al.

| Risk Group     | Original SNP | Chr | Position of original SNP (GRCh37) | Locus (Gene)         | Functional Consequence | Alleles |       | EAF  | European ancestry values as published |          | Present in ADVANCE? | Best ADVANCE Proxy | ADVANCE CE Effect Allele | Risk Factor | Ref  | Nb. of Ind |
|----------------|--------------|-----|-----------------------------------|----------------------|------------------------|---------|-------|------|---------------------------------------|----------|---------------------|--------------------|--------------------------|-------------|------|------------|
|                |              |     |                                   |                      |                        | Effect  | Other |      | $\beta$                               | p-value  |                     |                    |                          |             |      |            |
|                |              |     |                                   |                      |                        |         |       |      |                                       |          |                     |                    |                          |             |      |            |
|                | rs1387153    | 11  | 92690661                          | FAT3-MTNR1B          |                        | T       | C     | 0.28 | 0.030                                 | 3.96E-11 | No                  | rs11020124         | C                        | HbA1c       | (26) | 32 293     |
|                | rs10830963   | 11  | 92708710                          | MTNR1B               | Intron                 | G       | C     | 0.30 | 0.122                                 | 1.01E-06 | Yes                 |                    | G                        | T2D         | (25) | 47 117     |
|                | rs1153188    | 12  | 55098996                          | DCD-MUCL1            |                        | A       | T     | 0.73 | 0.077                                 | 1.80E-07 | Yes                 |                    | A                        | T2D         | (29) | 62 301     |
|                | rs1531343    | 12  | 66171053                          | RPSAP52              | Intron                 | C       | G     | 0.10 | 0.182                                 | 7.20E-09 | No                  | rs2884591          | C                        | T2D         | (25) | 141 454    |
|                | rs7961581    | 12  | 71663102                          | TSPAN8-LGR5          |                        | C       | T     | 0.25 | 0.086                                 | 1.82E-05 | Yes                 |                    | C                        | T2D         | (25) | 47 117     |
|                | rs7957197    | 12  | 121459344                         | OASL                 | Intron                 | T       | A     | 0.85 | 0.131                                 | 4.90E-08 | No                  | rs7131696          | T                        | T2D         | (25) | 141 454    |
|                | rs7998202    | 13  | 113367449                         | ATP11AUN             | Intron                 | G       | A     | 0.14 | 0.030                                 | 5.24E-09 | No                  | rs166864           | A                        | HbA1c       | (26) | 34 724     |
|                | rs11634397   | 15  | 80432222                          | ZFAND-FAH            |                        | G       | A     | 0.60 | 0.104                                 | 2.40E-09 | Yes                 |                    | G                        | T2D         | (25) | 141 454    |
|                | rs8042680    | 15  | 91521337                          | PRC1, PRC1-AS1       | Intron, Intron         | A       | C     | 0.22 | 0.095                                 | 4.10E-10 | Yes                 |                    | A                        | T2D         | (25) | 141 454    |
|                | rs9939609    | 16  | 53820527                          | FTO                  | Intron                 | A       | T     | 0.40 | 0.113                                 | 8.65E-08 | Yes                 |                    | A                        | T2D         | (25) | 47 117     |
|                | rs1046896    | 17  | 80685533                          | FN3KRP               | 3'UTR                  | T       | C     | 0.31 | 0.040                                 | 1.57E-26 | Yes                 |                    | T                        | HbA1c       | (26) | 45 953     |
|                | rs855791     | 22  | 37462936                          | TMPRSS6              | Exon non-syn.          | A       | G     | 0.42 | 0.030                                 | 2.74E-14 | Yes                 |                    | A                        | HbA1c       | (26) | 34 562     |
| <b>Obesity</b> | rs3127553    | 1   | 49438005                          | AGBL4                | Intron                 | A       | G     | 0.63 | 0.023                                 | 1.60E-10 | Yes                 |                    | A                        | WC          | (32) | 231 815    |
|                | rs2815752    | 1   | 72812440                          | LOC105378797         | Intron                 | A       | G     | 0.61 | 0.130                                 | 1.17E-14 | Yes                 |                    | A                        | BMI         | (33) | 198 380    |
|                | rs7531118    | 1   | 72837239                          | LOC105378797         | Intron                 | T       | C     | 0.44 | 0.027                                 | 1.47E-14 | Yes                 |                    | T                        | WC          | (32) | 231 912    |
|                | rs1514175    | 1   | 74991644                          | FPGT-TNNI3K, TNNI3K  | Intron, Intron         | A       | G     | 0.43 | 0.070                                 | 1.36E-09 | Yes                 |                    | A                        | BMI         | (33) | 227 900    |
|                | rs4130548    | 1   | 78463868                          | DNAJB4               | Intron                 | T       | C     | 0.65 | 0.022                                 | 3.40E-10 | Yes                 |                    | T                        | WC          | (32) | 232 042    |
|                | rs11165623   | 1   | 96893000                          | RWDD3-PTBP2          |                        | A       | G     | 0.49 | 0.020                                 | 5.23E-09 | Yes                 |                    | A                        | WC          | (32) | 232 057    |
|                | rs1555543    | 1   | 96944797                          | RWDD3-PTBP2          |                        | C       | A     | 0.59 | 0.060                                 | 7.65E-07 | Yes                 |                    | C                        | BMI         | (33) | 243 013    |
|                | rs984222     | 1   | 119503843                         | TBX15                | Intron                 | G       | C     | 0.37 | 0.034                                 | 8.69E-25 | Yes                 |                    | G                        | WHR         | (34) | 186 790    |
|                | rs1011731    | 1   | 172346548                         | DNM3                 | Intron                 | G       | A     | 0.57 | 0.028                                 | 9.51E-18 | Yes                 |                    | G                        | WHR         | (34) | 169 112    |
|                | rs633715     | 1   | 177852580                         | BRINP2-SEC16B        |                        | T       | C     | 0.80 | 0.043                                 | 3.30E-23 | No                  | rs543874           | C                        | WC          | (32) | 218 883    |
|                | rs543874     | 1   | 177889480                         | BRINP2-SEC16B        |                        | G       | A     | 0.19 | 0.220                                 | 1.66E-13 | Yes                 |                    | G                        | BMI         | (33) | 179 414    |
|                | rs2820292    | 1   | 201784287                         | NAV1                 | Intron                 | A       | G     | 0.45 | 0.019                                 | 2.37E-08 | Yes                 |                    | A                        | WC          | (32) | 231 899    |
|                | rs4846567    | 1   | 219750717                         | LYPLAL1-ZC3H11B      |                        | G       | T     | 0.28 | 0.034                                 | 6.89E-21 | Yes                 |                    | G                        | WHR         | (34) | 168 987    |
|                | rs6429082    | 1   | 235600129                         | TBCE (near B3GALNT2) | Intron                 | C       | T     | 0.50 | 0.026                                 | 2.59E-08 | No                  | rs704710           | A                        | WC          | (35) | 89 647     |
|                | rs2867125    | 2   | 622827                            | FAM150B-TMEM18       |                        | C       | T     | 0.83 | 0.310                                 | 2.42E-22 | Yes                 |                    | C                        | BMI         | (33) | 197 806    |
|                | rs6755502    | 2   | 635721                            | TMEM18-FAM150B       |                        | C       | T     | 0.17 | 0.051                                 | 2.03E-30 | Yes                 | rs2867125          | C                        | WC          | (32) | 231 849    |
|                | rs713586     | 2   | 25158008                          | ADCY3-DNAJC27        |                        | C       | T     | 0.47 | 0.140                                 | 1.80E-07 | Yes                 |                    | C                        | BMI         | (33) | 230 748    |
|                | rs887912     | 2   | 59302877                          | FANCL-BCL11A         |                        | T       | C     | 0.29 | 0.100                                 | 2.69E-06 | Yes                 |                    | T                        | BMI         | (33) | 242 807    |
|                | rs6545714    | 2   | 59307725                          | FANCL-BCL11A         |                        | A       | G     | 0.61 | 0.022                                 | 1.94E-10 | Yes                 |                    | A                        | WC          | (32) | 232 046    |
|                | rs2890652    | 2   | 142959931                         | LRP1B-KYNU           |                        | C       | T     | 0.18 | 0.090                                 | 2.38E-07 | Yes                 |                    | C                        | BMI         | (33) | 209 068    |
| <b>Obesity</b> | rs10195252   | 2   | 165513091                         | GRB14-COBLL1         |                        | T       | C     | 0.60 | 0.033                                 | 2.09E-24 | Yes                 |                    | T                        | WHR         | (34) | 179 568    |
|                | rs2176040    | 2   | 227092802                         | NYAP2-IRS1           |                        | A       | G     | 0.37 | 0.034                                 | 1.41E-12 | Yes                 |                    | A                        | WC          | (32) | 231 926    |
|                | rs6784615    | 3   | 52506426                          | NISCH                | Intron                 | T       | C     | 0.94 | 0.043                                 | 3.84E-10 | Yes                 |                    | T                        | WHR         | (34) | 185 887    |
|                | rs6795735    | 3   | 64705365                          | ADAMTS9-AS2          | Intron                 | C       | T     | 0.41 | 0.025                                 | 9.79E-14 | Yes                 |                    | C                        | WHR         | (34) | 161 642    |
|                | rs3849570    | 3   | 81819040                          | GBE1                 | Intron                 | A       | C     | 0.36 | 0.021                                 | 2.23E-08 | No                  | rs11711331         | A                        | WC          | (32) | 196 103    |

Electronic Supplementary Material J. Tremblay et al.

| Risk Group     | Original SNP | Chr | Position of original SNP (GRCh37) | Locus (Gene)        | Functional Consequence | Alleles |       | EAF  | European ancestry values as published |          | Present in ADVANCE? | Best ADVANCE Proxy | ADVANCE Effect Allele | Risk Factor | Ref  | Nb. of Ind |
|----------------|--------------|-----|-----------------------------------|---------------------|------------------------|---------|-------|------|---------------------------------------|----------|---------------------|--------------------|-----------------------|-------------|------|------------|
|                |              |     |                                   |                     |                        | Effect  | Other |      | $\beta$                               | p-value  |                     |                    |                       |             |      |            |
|                |              |     |                                   |                     |                        |         |       |      |                                       |          |                     |                    |                       |             |      |            |
|                | rs2325036    | 3   | 85819412                          | CADM2               | Intron                 | A       | C     | 0.60 | 0.023                                 | 2.06E-11 | Yes                 |                    | A                     | WC          | (32) | 232 048    |
|                | rs13078807   | 3   | 85842341                          | CADM2               | Intron                 | G       | A     | 0.20 | 0.100                                 | 9.81E-08 | No                  | rs9852859          | C                     | BMI         | (33) | 237 404    |
|                | rs6440003    | 3   | 141094209                         | ZBTB38              | Intron                 | A       | G     | 0.44 | 0.022                                 | 2.88E-10 | Yes                 |                    | A                     | WC          | (32) | 231 985    |
|                | rs1516725    | 3   | 185824004                         | ETV5                | Intron                 | T       | C     | 0.13 | 0.031                                 | 1.73E-09 | Yes                 |                    | T                     | WC          | (32) | 230 610    |
|                | rs9816226    | 3   | 185834499                         | ETV5-DGKG           |                        | T       | A     | 0.82 | 0.140                                 | 7.61E-14 | Yes                 |                    | T                     | BMI         | (33) | 196 221    |
|                | rs10938397   | 4   | 45182527                          | GNPDA2-GABRG1       |                        | A       | G     | 0.56 | 0.032                                 | 6.10E-20 | Yes                 |                    | A                     | WC          | (32) | 231 679    |
|                | rs2112347    | 5   | 75015242                          | LOC441087, POC5     | Intron, Upstr.2KB      | T       | G     | 0.63 | 0.033                                 | 2.40E-13 | Yes                 |                    | T                     | WC          | (32) | 232 028    |
|                | rs4836133    | 5   | 124330522                         | ZNF608-GRAMD3       |                        | A       | C     | 0.48 | 0.070                                 | 7.04E-07 | No                  | rs6864049          | C                     | BMI         | (33) | 241 999    |
|                | rs6861681    | 5   | 173362458                         | CPEB4               | Intron                 | A       | G     | 0.34 | 0.022                                 | 1.91E-09 | Yes                 |                    | A                     | WHR         | (34) | 162 886    |
|                | rs1294421    | 6   | 6743149                           | LOC101928004        | Intron                 | G       | T     | 0.39 | 0.028                                 | 1.75E-17 | Yes                 |                    | G                     | WHR         | (34) | 179 343    |
|                | rs806794     | 6   | 26200677                          | HIST1H2BF           | Downstream 500B        | A       | G     | 0.69 | 0.022                                 | 2.12E-09 | Yes                 |                    | A                     | WC          | (32) | 225 694    |
|                | rs206936     | 6   | 34302869                          | RPS10-NUDT3, NUDT3  | Intron, Intron         | G       | A     | 0.21 | 0.060                                 | 2.81E-06 | Yes                 |                    | G                     | BMI         | (33) | 249 777    |
|                | rs16894959   | 6   | 34769765                          | UHRF1BP1            | Exon syn.              | T       | C     | 0.84 | 0.026                                 | 3.44E-08 | No                  | rs4472337          | T                     | WC          | (32) | 230 687    |
|                | rs6905288    | 6   | 43758873                          | VEGFA-LOC105375070  |                        | A       | G     | 0.56 | 0.036                                 | 5.88E-25 | Yes                 |                    | A                     | WHR         | (34) | 172 559    |
|                | rs987237     | 6   | 50796905                          | TFAP2B              | Intron                 | G       | A     | 0.18 | 0.130                                 | 5.97E-16 | No                  | rs62405422         | C                     | BMI         | (33) | 195 776    |
|                | rs943005     | 6   | 50829192                          | TFAP2B-PKHD1        |                        | C       | T     | 0.18 | 0.039                                 | 7.22E-19 | No                  | rs62405422         | C                     | WC          | (32) | 232 080    |
|                | rs9400239    | 6   | 108977663                         | FOXO3               | Intron                 | T       | C     | 0.31 | 0.024                                 | 1.88E-11 | Yes                 |                    | T                     | WC          | (32) | 232 015    |
|                | rs9491696    | 6   | 127452639                         | RSPO3               | Intron                 | G       | C     | 0.52 | 0.042                                 | 1.84E-40 | No                  | rs2489623          | G                     | WHR         | (34) | 190 746    |
|                | rs2489623    | 6   | 127455821                         | RSPO3               | Intron                 | A       | C     | 0.48 | 0.019                                 | 3.41E-08 | Yes                 |                    | A                     | WC          | (32) | 231 857    |
|                | rs1055144    | 7   | 25871109                          | LOC100506236        | Non coding             | T       | C     | 0.21 | 0.040                                 | 9.97E-25 | Yes                 |                    | T                     | WHR         | (34) | 190 781    |
|                | rs10968576   | 9   | 28414339                          | LINGO2              | Intron                 | A       | G     | 0.68 | 0.025                                 | 1.17E-11 | Yes                 |                    | A                     | WC          | (32) | 232 050    |
|                | rs6163       | 10  | 104596924                         | CYP17A1             | Exon syn.              | A       | C     | 0.39 | 0.019                                 | 3.68E-08 | Yes                 |                    | A                     | WC          | (32) | 225 708    |
|                | rs7903146    | 10  | 114758349                         | TCF7L2              | Intron                 | T       | C     | 0.29 | 0.022                                 | 3.92E-09 | Yes                 |                    | T                     | WC          | (32) | 232 078    |
|                | rs4929949    | 11  | 8524973                           | STK33               | Intron                 | C       | T     | 0.52 | 0.060                                 | 7.57E-08 | No                  | rs7949988          | T                     | BMI         | (33) | 249 791    |
|                | rs10840100   | 11  | 8669437                           | TRIM66              | Intron                 | A       | G     | 0.36 | 0.020                                 | 5.42E-09 | Yes                 |                    | A                     | WC          | (32) | 232 029    |
|                | rs10767658   | 11  | 27672252                          | BDNF-AS (near BDNF) | Intron                 | C       | G     | 0.31 | 0.031                                 | 3.29E-17 | Yes                 |                    | C                     | WC          | (32) | 225 754    |
|                | rs10767664   | 11  | 27725986                          | BDNF                | Intron                 | A       | T     | 0.78 | 0.190                                 | 5.53E-13 | Yes                 |                    | A                     | BMI         | (33) | 204 158    |
|                | rs2293576    | 11  | 47434986                          | SLC39A13            | Exon syn.              | A       | G     | 0.33 | 0.022                                 | 9.36E-10 | Yes                 |                    | A                     | WC          | (32) | 226 024    |
| <b>Obesity</b> | rs3817334    | 11  | 47566352                          | MTCH2               | Intron                 | T       | C     | 0.41 | 0.060                                 | 4.79E-11 | No                  | rs7928842          | C                     | BMI         | (33) | 191 943    |
|                | rs718314     | 12  | 26453283                          | LOC105369705        | Intron                 | G       | A     | 0.74 | 0.030                                 | 1.14E-17 | Yes                 |                    | G                     | WHR         | (34) | 184 670    |
|                | rs7138803    | 12  | 50247468                          | BCDIN3D-FAIM2       |                        | A       | G     | 0.38 | 0.028                                 | 1.55E-15 | Yes                 |                    | A                     | WC          | (32) | 232 059    |
|                | rs1443512    | 12  | 54342684                          | HOXC13-HOXC12       |                        | A       | C     | 0.24 | 0.031                                 | 6.38E-17 | Yes                 |                    | A                     | WHR         | (34) | 189 518    |
|                | rs4771122    | 13  | 28029896                          | MTIF3               | Intron                 | G       | A     | 0.24 | 0.090                                 | 1.20E-07 | No                  | rs9512699          | G                     | BMI         | (33) | 198 577    |
|                | rs12429545   | 13  | 54102206                          | LOC105370210-OLFM4  |                        | A       | G     | 0.13 | 0.031                                 | 2.49E-09 | Yes                 |                    | A                     | WC          | (32) | 222 998    |
|                | rs10132280   | 14  | 25928179                          | STXBP6-NOVA1        |                        | A       | C     | 0.32 | 0.022                                 | 2.25E-09 | Yes                 |                    | A                     | WC          | (32) | 231 985    |
|                | rs12885454   | 14  | 29736838                          | LOC102724934        | Non coding             | A       | C     | 0.36 | 0.020                                 | 2.59E-08 | Yes                 |                    | A                     | WC          | (32) | 231 357    |
|                | rs10150332   | 14  | 79936964                          | NRXN3               | Intron                 | C       | T     | 0.21 | 0.130                                 | 2.03E-07 | Yes                 |                    | C                     | BMI         | (33) | 183 022    |

Electronic Supplementary Material J. Tremblay et al.

| Risk Group         | Original SNP | Chr | Position of original SNP (GRCh37) | Locus (Gene)      | Functional Consequence | Alleles |       | EAF  | European ancestry values as published |           | Present in ADVANCE? | Best ADVANCE Proxy | ADVANCE Effect Allele | Risk Factor | Ref  | Nb. of Ind |
|--------------------|--------------|-----|-----------------------------------|-------------------|------------------------|---------|-------|------|---------------------------------------|-----------|---------------------|--------------------|-----------------------|-------------|------|------------|
|                    |              |     |                                   |                   |                        | Effect  | Other |      | $\beta$                               | p-value   |                     |                    |                       |             |      |            |
|                    |              |     |                                   |                   |                        |         |       |      |                                       |           |                     |                    |                       |             |      |            |
|                    | rs7144011    | 14  | 79940383                          | NRXN3             | Intron                 | C       | T     | 0.22 | 0.033                                 | 9.40E-16  | No                  | rs10150332         | C                     | WC          | (32) | 232 007    |
|                    | rs2241423    | 15  | 68043057                          | MAP2K5            | Intron                 | G       | A     | 0.78 | 0.130                                 | 1.15E-10  | No                  | rs8028313          | C                     | BMI         | (33) | 227 950    |
|                    | rs4776970    | 15  | 68080886                          | MAP2K5            | Intron                 | A       | T     | 0.64 | 0.028                                 | 5.25E-09  | Yes                 |                    | A                     | WC          | (32) | 230 989    |
|                    | rs2531992    | 16  | 4021734                           | ADCY9             | Intron                 | A       | G     | 0.15 | 0.028                                 | 3.03E-09  | Yes                 |                    | A                     | WC          | (32) | 232 034    |
|                    | rs12444979   | 16  | 19933600                          | GPRC5B-GPR139     |                        | C       | T     | 0.87 | 0.170                                 | 4.20E-11  | Yes                 |                    | C                     | BMI         | (33) | 239 715    |
|                    | rs12446632   | 16  | 19935389                          | LOC105371116      | Intron                 | C       | T     | 0.14 | 0.036                                 | 5.21E-13  | No                  | rs12444979         | C                     | WC          | (32) | 226 701    |
|                    | rs2650492    | 16  | 28347140                          | SBK1              | 3'UTR                  | C       | A     | 0.30 | 0.026                                 | 2.46E-11  | No                  | rs2726036          | C                     | WC          | (32) | 231 921    |
|                    | rs7498665    | 16  | 28883241                          | SH2B1             | Exon non-syn.          | T       | C     | 0.60 | 0.034                                 | 1.43E-22  | No                  | rs7359397          | T                     | WC          | (32) | 230 193    |
|                    | rs7359397    | 16  | 28885659                          | SH2B1             | Downstream 500B        | T       | C     | 0.40 | 0.150                                 | 1.75E-10  | Yes                 |                    | T                     | BMI         | (33) | 204 309    |
|                    | rs1549293    | 16  | 31141993                          | KAT8 (near PRSS8) | Intron                 | T       | C     | 0.38 | 0.020                                 | 7.29E-09  | Yes                 |                    | T                     | WC          | (32) | 232 022    |
|                    | rs1558902    | 16  | 53786615                          | FTO               | Intron                 | A       | T     | 0.42 | 0.074                                 | 3.70E-101 | No                  | rs9939609          | A                     | WC          | (32) | 230 183    |
|                    | rs7239883    | 18  | 40147671                          | LINC00907         | Intron                 | A       | G     | 0.60 | 0.021                                 | 2.30E-09  | Yes                 |                    | A                     | WC          | (32) | 231 731    |
|                    | rs6567160    | 18  | 57829135                          | PMAIP1-MC4R       |                        | T       | C     | 0.77 | 0.048                                 | 2.61E-33  | No                  | rs571312           | A                     | WC          | (32) | 231 894    |
|                    | rs571312     | 18  | 57839769                          | CCBE1-CDH20       |                        | A       | C     | 0.24 | 0.230                                 | 1.82E-22  | Yes                 |                    | A                     | BMI         | (33) | 203 600    |
|                    | rs29941      | 19  | 34309532                          | KCTD15-LSM14A     |                        | G       | A     | 0.67 | 0.060                                 | 1.31E-09  | Yes                 |                    | G                     | BMI         | (33) | 192 872    |
|                    | rs3810291    | 19  | 47569003                          | ZC3H4             | 3'UTR                  | A       | G     | 0.67 | 0.026                                 | 1.67E-10  | Yes                 |                    | A                     | WC          | (32) | 210 501    |
|                    | rs16996700   | 20  | 50981945                          | LOC105372666      | Intron                 | T       | C     | 0.73 | 0.023                                 | 1.52E-09  | Yes                 |                    | T                     | WC          | (32) | 231 903    |
|                    | rs4823006    | 22  | 29451671                          | ZNRF3             | 3'UTR                  | A       | G     | 0.57 | 0.023                                 | 1.10E-11  | Yes                 |                    | A                     | WHR         | (34) | 170 997    |
| <b>Albuminuria</b> | rs11579312   | 1   | 30656572                          | LOC105378617      | Intron                 | T       | C     | 0.69 | 0.110                                 | 9.70E-06  | Yes                 |                    | T                     | MA          | (36) | 54 116     |
|                    | rs914615     | 1   | 155175892                         | THBS3             | Intron                 | A       | G     | 0.47 | 0.030                                 | 7.40E-06  | Yes                 |                    | G                     | UACR        | (36) | 44 877     |
|                    | rs13427836   | 2   | 129027961                         | HS6ST1            | Intron                 | T       | C     | 0.14 | 0.199                                 | 6.10E-06  | Yes                 |                    | T                     | UACR        | (36) | 5 509      |
|                    | rs17346504   | 2   | 137923761                         | THSD7B            | Intron                 | T       | C     | 0.12 | 0.050                                 | 7.20E-06  | Yes                 |                    | T                     | UACR        | (36) | 53 401     |
|                    | rs16827742   | 2   | 150901005                         | MMADHC-RND3       |                        | A       | G     | 0.06 | 0.300                                 | 3.10E-06  | No                  | rs114375510        | C                     | MA          | (36) | 35 962     |
|                    | rs11678190   | 2   | 187560308                         | FAM171B           | Intron                 | A       | C     | 0.70 | 0.100                                 | 5.10E-06  | Yes                 |                    | C                     | MA          | (36) | 54 107     |
| <b>Albuminuria</b> | rs11678190   | 2   | 187560308                         | FAM171B           | Intron                 | A       | C     | 0.70 | 0.035                                 | 5.10E-06  | Yes                 |                    | C                     | UACR        | (36) | 54 107     |
|                    | rs13079877   | 3   | 2130400                           | CNTN4-CNTN6       |                        | A       | G     | 0.45 | 0.148                                 | 5.60E-06  | No                  | rs7633224          | T                     | UACR        | (36) | 5 825      |
|                    | rs1077216    | 3   | 46892161                          | MYL3-PRSS42       |                        | T       | C     | 0.07 | 0.200                                 | 5.20E-06  | Yes                 |                    | T                     | MA          | (36) | 45 096     |
|                    | rs7634770    | 3   | 66931027                          | LOC105377144      | Intron                 | A       | C     | 0.70 | 0.142                                 | 2.70E-06  | No                  | rs34401437         | T                     | UACR        | (36) | 5 825      |
|                    | rs13160548   | 5   | 38778850                          | OSMR-AS1          | Intron                 | T       | C     | 0.69 | 0.100                                 | 8.20E-06  | Yes                 |                    | C                     | MA          | (36) | 53 130     |
|                    | rs12719264   | 5   | 119183940                         | LOC105379144      | Intron                 | A       | G     | 0.30 | 0.110                                 | 6.20E-06  | Yes                 |                    | G                     | MA          | (36) | 54 115     |
|                    | rs17738155   | 6   | 51156076                          | TFAP2B-PKHD1      |                        | T       | C     | 0.92 | 0.241                                 | 5.90E-06  | Yes                 |                    | C                     | UACR        | (36) | 5 825      |
|                    | rs2110904    | 6   | 107594771                         | PDSS2             | Intron                 | T       | C     | 0.65 | 0.100                                 | 8.90E-06  | Yes                 |                    | T                     | MA          | (36) | 54 116     |
|                    | rs4722909    | 7   | 29514931                          | CHN2              | Intron                 | A       | G     | 0.60 | 0.134                                 | 3.20E-06  | Yes                 |                    | G                     | UACR        | (36) | 5 823      |
|                    | rs17301329   | 8   | 54858981                          | RGS20             | Intron                 | A       | T     | 0.29 | 0.042                                 | 5.60E-07  | Yes                 |                    | A                     | UACR        | (36) | 54 450     |
|                    | rs7851726    | 9   | 97503985                          | C9orf3            | Intron                 | T       | C     | 0.42 | 0.027                                 | 5.20E-06  | Yes                 |                    | T                     | UACR        | (36) | 54 450     |
|                    | rs1109861    | 10  | 11246269                          | CELF2             | Intron                 | A       | C     | 0.55 | 0.030                                 | 1.90E-06  | Yes                 |                    | C                     | UACR        | (36) | 54 442     |
|                    | rs17343073   | 10  | 16937659                          | CUBN              | Intron                 | A       | T     | 0.90 | 0.071                                 | 4.00E-09  | No                  | rs79801018         | C                     | UACR        | (36) | 54 449     |



Electronic Supplementary Material J. Tremblay et al.

| Risk Group                 | Original SNP | Chr      | Position of original SNP (GRCh37) | Locus (Gene)        | Functional Consequence | Alleles |       | EAF   | European ancestry values as published |          | Present in ADVANCE? | Best ADVANCE Proxy | ADVANCE CE Effect Allele | Risk Factor | Ref     | Nb. of Ind |
|----------------------------|--------------|----------|-----------------------------------|---------------------|------------------------|---------|-------|-------|---------------------------------------|----------|---------------------|--------------------|--------------------------|-------------|---------|------------|
|                            |              |          |                                   |                     |                        | Effect  | Other |       | $\beta$                               | p-value  |                     |                    |                          |             |         |            |
|                            |              |          |                                   |                     |                        |         |       |       |                                       |          |                     |                    |                          |             |         |            |
|                            | rs6602163    | 10       | 16966766                          | CUBN                | Intron                 | A       | G     | 0.84  | 0.056                                 | 1.20E-09 | Yes                 |                    | G                        | UACR        | (36)    | 54 450     |
|                            | rs12764441   | 10       | 72691651                          | PCBD1-UNC5B         |                        | T       | C     | 0.48  | 0.100                                 | 3.50E-06 | Yes                 |                    | C                        | MA          | (36)    | 54 116     |
|                            | rs3740393    | 10       | 104636655                         | BORCS7-ASMT, AS3MT  | Intron, Intron         | C       | G     | 0.21  | 0.130                                 | 6.10E-06 | Yes                 |                    | C                        | MA          | (36)    | 54 048     |
|                            | rs7922045    | 10       | 123001732                         | WDR11-FGFR2         |                        | T       | C     | 0.26  | 0.165                                 | 5.70E-07 | Yes                 |                    | T                        | UACR        | (36)    | 5 824      |
|                            | rs729014     | 10       | 123002806                         | WDR11-FGFR2         |                        | T       | C     | 0.15  | 0.202                                 | 2.40E-06 | Yes                 |                    | T                        | UACR        | (36)    | 5 825      |
|                            | rs10899033   | 11       | 74393342                          | POLD3-CHRD2         |                        | C       | G     | 0.72  | 0.110                                 | 9.30E-06 | No                  | rs7111585          | T                        | MA          | (36)    | 54 116     |
|                            | rs649529     | 11       | 88006821                          | CTSC-RAB38          |                        | T       | G     | 0.43  | 0.147                                 | 9.30E-06 | No                  | rs605042           | A                        | UACR        | (36)    | 5 825      |
|                            | rs2303658    | 12       | 20278430                          | LOC105369684        | Intron                 | A       | G     | 0.34  | 0.030                                 | 9.50E-06 | Yes                 |                    | A                        | UACR        | (36)    | 54 442     |
|                            | rs7145202    | 14       | 23092105                          | ABHD4-OXA1L         |                        | T       | C     | 0.62  | 0.100                                 | 3.70E-06 | Yes                 |                    | T                        | MA          | (36)    | 54 106     |
|                            | rs1728897    | 15       | 55301370                          | UNC13C-RSL24D1      |                        | T       | C     | 0.54  | 0.028                                 | 4.10E-06 | Yes                 |                    | C                        | UACR        | (36)    | 54 433     |
|                            | rs1528472    | 15       | 55321128                          | UNC13C-RSL24D1      |                        | A       | C     | 0.48  | 0.032                                 | 5.40E-07 | Yes                 |                    | C                        | UACR        | (36)    | 54 445     |
|                            | rs231227     | 19       | 36268067                          | ARHGAP33            | 5'UTR                  | A       | G     | 0.38  | 0.033                                 | 4.90E-06 | Yes                 |                    | A                        | UACR        | (36)    | 44 877     |
|                            | rs6513791    | 20       | 41058122                          | PTPRT               | Intron                 | T       | C     | 0.18  | 0.120                                 | 4.40E-06 | Yes                 |                    | T                        | MA          | (36)    | 54 115     |
|                            | rs2828785    | 21       | 25437505                          | No gene within 1 Mb |                        | T       | C     | 0.27  | 0.038                                 | 7.90E-06 | Yes                 |                    | C                        | UACR        | (36)    | 54 450     |
| Glomerular Filtration Rate | rs1800615    | 1        | 15832281                          | CASP9               | Intron                 | T       | C     | 0.30  | 0.006                                 | 1.90E-09 | Yes                 |                    | T                        | eGFR        | (37)    | 133 413    |
|                            | rs12136063   | 1        | 110014170                         | SYPL2               | Intron                 | A       | G     | 0.70  | 0.005                                 | 4.71E-08 | Yes                 |                    | G                        | eGFR        | (37)    | 175 426    |
|                            | rs267734     | 1        | 150951447                         | CERS2-ANXA9         |                        | T       | C     | 0.79  | 0.008                                 | 4.01E-13 | Yes                 |                    | T                        | eGFR        | (37)    | 133 413    |
|                            | rs3850625    | 1        | 201016296                         | CACNA1S             | Exon non-syn.          | A       | G     | 0.12  | 0.008                                 | 6.82E-11 | Yes                 |                    | G                        | eGFR        | (37)    | 153 107    |
|                            | rs2802729    | 1        | 243501763                         | SDCCAG8             | Intron                 | A       | C     | 0.43  | 0.005                                 | 2.20E-08 | Yes                 |                    | A                        | eGFR        | (37)    | 174 808    |
|                            | rs807601     | 2        | 15793014                          | DDX1-MYCN           |                        | T       | G     | 0.34  | 0.006                                 | 6.60E-12 | Yes                 |                    | G                        | eGFR        | (37)    | 133 413    |
| Glomerular Filtration Rate | rs1260326    | 2        | 27741237                          | GCKR                | Exon non-syn.          | T       | C     | 0.42  | 0.007                                 | 3.38E-14 | No                  | rs780094           | C                        | eGFR        | (37)    | 133 413    |
|                            | rs6546838    | 2        | 73679280                          | ALMS1               | Exon non-syn.          | A       | G     | 0.76  | 0.009                                 | 7.72E-20 | Yes                 |                    | A                        | eGFR        | (37)    | 133 413    |
|                            | rs4667594    | 2        | 170008506                         | LRP2                | Intron                 | A       | T     | 0.53  | 0.004                                 | 3.52E-08 | Yes                 |                    | A                        | eGFR        | (37)    | 175 337    |
|                            | rs2712184    | 2        | 217682779                         | LOC101928278        | Intron                 | A       | C     | 0.58  | 0.005                                 | 1.33E-10 | Yes                 |                    | A                        | eGFR        | (37)    | 153 854    |
|                            | rs6795744    | 3        | 13906850                          | WNT7A               | Intron                 | A       | G     | 0.15  | 0.006                                 | 3.33E-08 | Yes                 |                    | G                        | eGFR        | (37)    | 175 490    |
|                            | rs347685     | 3        | 141807137                         | TFDP2               | Intron                 | A       | C     | 0.72  | 0.009                                 | 3.00E-11 | Yes                 |                    | A                        | eGFR        | (38)    | 67 093     |
|                            | rs9682041    | 3        | 170120054                         | SKIL                | Intron                 | T       | C     | 0.87  | 0.007                                 | 2.58E-08 | No                  | rs6767869          | C                        | eGFR        | (37)    | 150 911    |
|                            | rs10513801   | 3        | 185824004                         | ETV5                | Intron                 | T       | G     | 0.87  | 0.007                                 | 1.03E-09 | No                  | rs1516725          | T                        | eGFR        | (37)    | 154 774    |
|                            | rs17319721   | 4        | 77368847                          | SHROOM3             | Intron                 | A       | G     | 0.43  | 0.011                                 | 1.32E-37 | Yes                 |                    | A                        | eGFR        | (37)    | 133 413    |
|                            | rs228611     | 4        | 103561709                         | MANBA (near NFKB1)  | Intron                 | A       | G     | 0.47  | 0.006                                 | 3.58E-12 | Yes                 |                    | A                        | eGFR        | (37)    | 175 445    |
|                            | rs11959928   | 5        | 39393733                          | DAB2                | Intron                 | A       | T     | 0.44  | 0.009                                 | 1.40E-17 | No                  | rs10062079         | A                        | eGFR        | (38)    | 67 093     |
|                            | rs7759001    | 6        | 27341409                          | ZNF204P, ZNF391     | Intron, Upstr.2KB      | A       | G     | 0.76  | 0.005                                 | 1.75E-08 | Yes                 |                    | A                        | eGFR        | (37)    | 175 483    |
|                            | rs9472135    | 6        | 43809802                          | LOC107986598        | Intron                 | T       | C     | 0.71  | 0.008                                 | 3.34E-15 | Yes                 |                    | T                        | eGFR        | (37)    | 133 413    |
|                            | rs316009     | 6        | 160675764                         | SLC22A2             | Intron                 | T       | C     | 0.10  | 0.013                                 | 4.38E-19 | Yes                 |                    | C                        | eGFR        | (37)    | 133 413    |
|                            | rs3127573    | 6        | 160681393                         | SLC22A2             | Upstr. 2KB             | G       | A     | 0.13  | 1.100                                 | 6.50E-10 | Yes                 |                    | G                        | CREAT       | (39)    | 23 812     |
|                            | rs3750082    | 7        | 32927727                          | KBTBD2              | Intron                 | A       | T     | 0.33  | 0.005                                 | 3.22E-08 | No                  | rs970673           | A                        | eGFR        | (37)    | 168 494    |
| rs848490                   | 7            | 77555005 | PHTF2                             | Intron              | C                      | G       | 0.73  | 0.007 | 7.80E-13                              | Yes      |                     | G                  | eGFR                     | (37)        | 133 413 |            |

Electronic Supplementary Material J. Tremblay et al.

| Risk Group                 | Original SNP | Chr | Position of original SNP (GRCh37) | Locus (Gene)        | Functional Consequence | Alleles |       | EAF  | European ancestry values as published |          | Present in ADVANCE? | Best ADVANCE Proxy | ADVANCE Effect Allele | Risk Factor | Ref  | Nb. of Ind |
|----------------------------|--------------|-----|-----------------------------------|---------------------|------------------------|---------|-------|------|---------------------------------------|----------|---------------------|--------------------|-----------------------|-------------|------|------------|
|                            |              |     |                                   |                     |                        | Effect  | Other |      | β                                     | p-value  |                     |                    |                       |             |      |            |
|                            |              |     |                                   |                     |                        |         |       |      |                                       |          |                     |                    |                       |             |      |            |
|                            | rs7805747    | 7   | 151406220                         | PRKAG2              | Intron                 | A       | G     | 0.25 | 0.013                                 | 7.96E-29 | No                  | rs17173238         | G                     | eGFR        | (37) | 133 413    |
|                            | rs1731274    | 8   | 23766319                          | STC1-ADAM28         |                        | G       | A     | 0.45 | 0.017                                 | 4.60E-08 | Yes                 |                    | G                     | eGFR        | (40) | 90 075     |
|                            | rs4744712    | 9   | 71434707                          | PIP5K1B             | Intron                 | A       | C     | 0.40 | 0.007                                 | 4.29E-15 | Yes                 |                    | A                     | eGFR        | (37) | 133 413    |
|                            | rs1044261    | 10  | 997740                            | IDI2                | Stop-Gain              | T       | C     | 0.08 | 0.011                                 | 1.21E-11 | No                  | rs149288300        | G                     | eGFR        | (37) | 133 413    |
|                            | rs10994860   | 10  | 52645424                          | A1CF                | 5'UTR                  | T       | C     | 0.19 | 0.008                                 | 1.07E-12 | Yes                 |                    | C                     | eGFR        | (37) | 154 644    |
|                            | rs163160     | 11  | 2789955                           | KCNQ1               | Intron                 | A       | G     | 0.82 | 0.007                                 | 2.26E-09 | Yes                 |                    | G                     | eGFR        | (37) | 154 684    |
|                            | rs963837     | 11  | 30749090                          | LOC101928316        | Intron                 | T       | C     | 0.54 | 0.008                                 | 5.69E-18 | Yes                 |                    | T                     | eGFR        | (37) | 133 413    |
|                            | rs4014195    | 11  | 65506822                          | RNASEH2C-AP5B1      |                        | C       | G     | 0.64 | 0.006                                 | 1.10E-11 | Yes                 |                    | G                     | eGFR        | (37) | 175 400    |
|                            | rs10774021   | 12  | 349298                            | SLC6A13             | Intron                 | T       | C     | 0.65 | 0.006                                 | 4.77E-12 | Yes                 |                    | T                     | eGFR        | (37) | 133 413    |
|                            | rs10491967   | 12  | 3368093                           | TSPAN9              | Intron                 | A       | G     | 0.10 | 0.010                                 | 5.18E-14 | Yes                 |                    | A                     | eGFR        | (37) | 175 670    |
|                            | rs7956634    | 12  | 15321194                          | REERG               | Intron                 | T       | C     | 0.81 | 0.007                                 | 7.17E-12 | Yes                 |                    | T                     | eGFR        | (37) | 175 448    |
|                            | rs1106766    | 12  | 57738600                          | R3HDM2 (near INHBC) | Intron                 | T       | C     | 0.22 | 0.006                                 | 2.41E-09 | No                  | rs79395356         | T                     | eGFR        | (37) | 154 665    |
|                            | rs653178     | 12  | 111865049                         | ATXN2               | Intron                 | C       | T     | 0.51 | 0.003                                 | 3.50E-11 | No                  | rs7310615          | C                     | eGFR        | (38) | 67 093     |
|                            | rs626277     | 13  | 72347696                          | DACH1               | Intron                 | A       | C     | 0.60 | 0.009                                 | 2.50E-11 | Yes                 |                    | A                     | eGFR        | (38) | 67 093     |
|                            | rs476633     | 15  | 41392134                          | INO80               | Intron                 | C       | G     | 0.57 | 0.005                                 | 8.90E-09 | Yes                 |                    | G                     | eGFR        | (37) | 133 413    |
|                            | rs2453533    | 15  | 45641225                          | SLC28A2-GATM        |                        | A       | C     | 0.62 | 0.013                                 | 4.60E-22 | Yes                 |                    | A                     | eGFR        | (38) | 67 093     |
| Glomerular Filtration Rate | rs491567     | 15  | 53946593                          | WDR72               | Intron                 | A       | C     | 0.78 | 0.008                                 | 2.86E-15 | Yes                 |                    | A                     | eGFR        | (37) | 133 413    |
|                            | rs1394125    | 15  | 76158983                          | UBE2Q2              | Intron                 | A       | G     | 0.35 | 0.007                                 | 5.47E-14 | Yes                 |                    | A                     | eGFR        | (37) | 133 413    |
|                            | rs4293393    | 16  | 20364588                          | UMOD                | Intron                 | T       | C     | 0.80 | 1.930                                 | 1.30E-23 | Yes                 |                    | T                     | CREAT       | (41) | 24 635     |
|                            | rs13329952   | 16  | 20366507                          | UMOD                | Intron                 | T       | C     | 0.81 | 0.016                                 | 9.47E-43 | No                  | rs4293393          | T                     | eGFR        | (37) | 133 413    |
|                            | rs164748     | 16  | 89708292                          | DPEP1               | Downstream 500B        | C       | G     | 0.53 | 0.005                                 | 1.95E-08 | Yes                 |                    | G                     | eGFR        | (37) | 154 497    |
|                            | rs11657044   | 17  | 59450105                          | BCAS3               | Intron                 | T       | C     | 0.19 | 0.012                                 | 7.89E-22 | Yes                 |                    | T                     | eGFR        | (37) | 133 413    |
|                            | rs8068318    | 17  | 59483766                          | TBX2                | Intron                 | G       | A     | 0.27 | 0.800                                 | 3.40E-10 | Yes                 |                    | G                     | CREAT       | (39) | 23 812     |
|                            | rs12460876   | 19  | 33356891                          | SLC7A9              | Intron                 | T       | C     | 0.60 | 0.007                                 | 1.86E-13 | Yes                 |                    | T                     | eGFR        | (37) | 133 413    |
|                            | rs11666497   | 19  | 38464262                          | SIPA1L3             | Intron                 | T       | C     | 0.18 | 0.006                                 | 4.25E-08 | Yes                 |                    | T                     | eGFR        | (37) | 168 911    |
|                            | rs6088580    | 20  | 33285053                          | PIGU-TP53INP2       |                        | C       | G     | 0.47 | 0.005                                 | 1.79E-09 | Yes                 |                    | C                     | eGFR        | (37) | 167 365    |
|                            | rs17216707   | 20  | 52742306                          | BCAS1-CYP24A1       |                        | T       | C     | 0.79 | 0.008                                 | 8.83E-15 | No                  | rs8121940          | C                     | eGFR        | (37) | 173 627    |
| Blood Pressure             | rs17367504   | 1   | 11887303                          | MTHFR               | Intron                 | G       | A     | 0.15 | 0.725                                 | 8.70E-22 | No                  | rs7537765          | A                     | HTN         | (42) | 125 372    |
|                            | rs17367504   | 1   | 11887303                          | MTHFR               | Intron                 | G       | A     | 0.15 | 0.903                                 | 8.70E-22 | No                  | rs7537765          | A                     | SBP         | (42) | 125 372    |
|                            | rs848309     | 1   | 16308447                          | ZBTB17-C1orf64      |                        | T       | C     | 0.57 | 0.347                                 | 7.07E-12 | Yes                 |                    | T                     | SBP         | (43) | 287 217    |
|                            | rs4360494    | 1   | 38455891                          | SF3A3               | Upstr. 2KB             | C       | G     | 0.55 | 0.278                                 | 3.70E-16 | Yes                 |                    | C                     | PP          | (44) | 282 851    |
|                            | rs112557609  | 1   | 56576924                          | LOC105378741        | Intron                 | A       | G     | 0.35 | 0.227                                 | 6.80E-12 | Yes                 |                    | A                     | PP          | (44) | 325 952    |
|                            | rs3889199    | 1   | 59653742                          | JUN-FGGY            |                        | A       | G     | 0.71 | 0.351                                 | 1.80E-24 | Yes                 |                    | A                     | PP          | (44) | 329 486    |
|                            | rs2932538    | 1   | 113216543                         | MOV10               | Upstream 2KB           | G       | A     | 0.75 | 0.388                                 | 1.20E-09 | Yes                 |                    | G                     | SBP         | (42) | 194 667    |
|                            | rs2289081    | 2   | 20881840                          | LDHAH               | Downstream 500B        | C       | G     | 0.36 | 0.223                                 | 5.50E-12 | Yes                 |                    | C                     | PP          | (44) | 329 140    |
|                            | rs11690961   | 2   | 46363336                          | PRKCE               | Intron                 | A       | C     | 0.88 | 0.340                                 | 3.90E-12 | Yes                 |                    | A                     | PP          | (44) | 327 847    |
|                            | rs74181299   | 2   | 65283972                          | CEP68               | Intron                 | T       | C     | 0.62 | 0.230                                 | 9.60E-13 | Yes                 |                    | T                     | PP          | (44) | 324 224    |

Electronic Supplementary Material J. Tremblay et al.

| Risk Group     | Original SNP | Chr | Position of original SNP (GRCh37) | Locus (Gene)       | Functional Consequence | Alleles |       | EAF  | European ancestry values as published |          | Present in ADVANCE? | Best ADVANCE Proxy | ADVANCE CE Effect Allele | Risk Factor | Ref  | Nb. of Ind |
|----------------|--------------|-----|-----------------------------------|--------------------|------------------------|---------|-------|------|---------------------------------------|----------|---------------------|--------------------|--------------------------|-------------|------|------------|
|                |              |     |                                   |                    |                        | Effect  | Other |      | $\beta$                               | p-value  |                     |                    |                          |             |      |            |
|                |              |     |                                   |                    |                        |         |       |      |                                       |          |                     |                    |                          |             |      |            |
|                | rs11689667   | 2   | 85491365                          | TCF7L1             | Intron                 | T       | C     | 0.54 | 0.176                                 | 1.70E-08 | Yes                 |                    | T                        | PP          | (44) | 330 634    |
|                | rs1250259    | 2   | 216300185                         | FN1                | Exon non-syn.          | A       | T     | 0.74 | 0.314                                 | 8.70E-19 | No                  | rs1250258          | T                        | PP          | (44) | 325 485    |
|                | rs13082711   | 3   | 27537909                          | SLC4A7-EOMES       |                        | T       | C     | 0.78 | 0.315                                 | 1.50E-06 | Yes                 |                    | C                        | SBP         | (42) | 198 112    |
|                | rs3774372    | 3   | 41877414                          | ULK4               | Exon non-syn.          | T       | C     | 0.83 | 0.067                                 | 3.90E-01 | Yes                 |                    | C                        | SBP         | (42) | 162 083    |
|                | rs419076     | 3   | 169113110                         | MECOM              | Intron                 | T       | C     | 0.47 | 0.325                                 | 3.10E-04 | No                  | rs2421647          | C                        | HTN         | (42) | 193 725    |
|                | rs419076     | 3   | 169113110                         | MECOM              | Intron                 | T       | C     | 0.47 | 0.409                                 | 1.80E-13 | No                  | rs2421647          | C                        | SBP         | (42) | 193 725    |
|                | rs871606     | 4   | 54799245                          | LNK1-CHIC2         |                        | T       | C     | 0.85 | 0.429                                 | 1.32E-08 | Yes                 |                    | T                        | PP          | (45) | 115 525    |
|                | rs1458038    | 4   | 81164723                          | PRDM8-FGF5         |                        | T       | C     | 0.29 | 0.706                                 | 1.50E-23 | Yes                 |                    | T                        | SBP         | (42) | 139 686    |
|                | rs13107325   | 4   | 103112470                         | SLC39A8            | Exon non-syn.          | T       | C     | 0.05 | 0.981                                 | 3.30E-14 | No                  | rs6855246          | A                        | SBP         | (42) | 150 915    |
|                | rs78049276   | 4   | 148427503                         | EDNRA              | Intron                 | C       | A     | 0.13 | 0.267                                 | 1.00E-08 | Yes                 |                    | C                        | PP          | (44) | 321 315    |
|                | rs146853253  | 4   | 156391307                         | MAP9-GUCY1A3       |                        | Del     | A     | 0.16 | 0.316                                 | 7.00E-14 | No                  | rs17033041         | G                        | PP          | (44) | 322 302    |
|                | rs13139571   | 4   | 156645513                         | GUCY1A3            | Intron                 | C       | A     | 0.76 | 0.321                                 | 1.20E-06 | Yes                 |                    | C                        | SBP         | (42) | 185 421    |
| Blood Pressure | rs1566497    | 4   | 169717148                         | PALLD              | Intron                 | A       | C     | 0.42 | 0.236                                 | 1.90E-13 | Yes                 |                    | A                        | PP          | (44) | 320 948    |
|                | rs17059668   | 4   | 174584663                         | HAND2-AS1-FBXO8    |                        | C       | G     | 0.92 | 0.332                                 | 2.80E-08 | Yes                 |                    | C                        | PP          | (44) | 313 277    |
|                | rs1173771    | 5   | 32819073                          | NPR3-TARS          |                        | G       | A     | 0.60 | 0.383                                 | 3.20E-10 | No                  | rs9292468          | C                        | HTN         | (42) | 131 276    |
|                | rs10057188   | 5   | 77837789                          | LHFPL2             | Intron                 | A       | G     | 0.46 | 0.205                                 | 6.70E-11 | Yes                 |                    | A                        | PP          | (44) | 325 985    |
|                | rs31864      | 5   | 158227898                         | EBF1               | Intron                 | A       | G     | 0.55 | 0.206                                 | 6.00E-11 | No                  | rs12332693         | A                        | PP          | (44) | 326 557    |
|                | rs1799945    | 6   | 26091179                          | HFE                | Exon non-syn.          | G       | C     | 0.14 | 0.627                                 | 7.70E-12 | Yes                 |                    | G                        | SBP         | (42) | 148 597    |
|                | rs805303     | 6   | 31724345                          | BAG6               | Intron                 | G       | A     | 0.61 | 0.376                                 | 1.50E-11 | Yes                 |                    | G                        | SBP         | (42) | 201 745    |
|                | rs185819     | 6   | 32050067                          | TNXB               | Exon non-syn.          | T       | C     | 0.51 | 0.365                                 | 1.04E-17 | Yes                 |                    | T                        | SBP         | (43) | 364 144    |
|                | rs11154027   | 6   | 121781390                         | GJA1-HSF2          |                        | T       | C     | 0.47 | 0.207                                 | 1.10E-10 | Yes                 |                    | T                        | PP          | (44) | 316 708    |
|                | rs36083386   | 6   | 152397913                         | ESR1               | Intron                 | C       | Del   | 0.11 | 0.439                                 | 1.50E-18 | Yes                 |                    | AC                       | PP          | (44) | 323 303    |
|                | rs449789     | 6   | 159699125                         | FNDC1-LOC105378084 |                        | C       | G     | 0.14 | 0.359                                 | 2.40E-15 | Yes                 |                    | C                        | PP          | (44) | 325 584    |
|                | rs1322639    | 6   | 169587103                         | SMOC2-THBS2        |                        | A       | G     | 0.78 | 0.316                                 | 4.80E-17 | Yes                 |                    | A                        | PP          | (44) | 319 866    |
|                | rs76206723   | 7   | 40410924                          | SUGCT              | Intron                 | A       | G     | 0.10 | 0.346                                 | 7.40E-12 | No                  | rs77410344         | C                        | PP          | (44) | 328 162    |
|                | rs17477177   | 7   | 106414069                         | CCDC71L-PIK3CG     |                        | C       | T     | 0.28 | 0.418                                 | 2.27E-13 | No                  | rs2392929          | G                        | PP          | (45) | 112 996    |
|                | rs6557876    | 8   | 25904388                          | EBF2               | Intron                 | C       | T     | 0.25 | 0.371                                 | 2.85E-14 | No                  | rs9314318          | A                        | SBP         | (43) | 369 457    |
|                | rs35783704   | 8   | 105978368                         | LRP12-ZFPM2        |                        | G       | A     | 0.11 | 0.414                                 | 7.08E-09 | No                  | rs11774829         | A                        | SBP         | (43) | 349 452    |
|                | rs2071518    | 8   | 120435812                         | NOV                | 3'UTR                  | T       | C     | 0.17 | 0.312                                 | 3.66E-09 | Yes                 |                    | T                        | PP          | (45) | 119 056    |
|                | rs4454254    | 8   | 141060027                         | TRAPPC9            | Intron                 | A       | G     | 0.63 | 0.261                                 | 5.10E-16 | Yes                 |                    | A                        | PP          | (44) | 330 022    |
|                | rs72765298   | 9   | 127961103                         | SCAI               | Intron                 | T       | C     | 0.87 | 0.374                                 | 2.70E-14 | No                  | rs869248           | A                        | PP          | (44) | 316 271    |
|                | rs4373814    | 10  | 18419972                          | SLC39A12-CACNB2    |                        | G       | C     | 0.55 | 0.373                                 | 4.80E-11 | Yes                 |                    | C                        | SBP         | (42) | 188 387    |
|                | rs1813353    | 10  | 18707448                          | CACNB2             | Intron                 | T       | C     | 0.68 | 0.569                                 | 2.60E-12 | Yes                 |                    | T                        | SBP         | (42) | 101 841    |
|                | rs9337951    | 10  | 30317073                          | KIAA1462           | Exon syn.              | A       | G     | 0.34 | 0.280                                 | 2.50E-15 | Yes                 |                    | A                        | PP          | (44) | 299 646    |
|                | rs10826995   | 10  | 32082658                          | ARHGAP12-ZEB1      |                        | T       | C     | 0.71 | 0.212                                 | 1.10E-09 | Yes                 |                    | T                        | PP          | (44) | 327 373    |
|                | rs4590817    | 10  | 63467553                          | C10orf107          | Intron                 | G       | C     | 0.84 | 0.646                                 | 4.00E-12 | Yes                 |                    | G                        | SBP         | (42) | 111 048    |
|                | rs932764     | 10  | 95895940                          | PLCE1              | Intron                 | G       | A     | 0.44 | 0.484                                 | 7.10E-16 | Yes                 |                    | G                        | SBP         | (42) | 160 885    |

Electronic Supplementary Material J. Tremblay et al.

| Risk Group     | Original SNP | Chr      | Position of original SNP (GRCh37) | Locus (Gene)             | Functional Consequence | Alleles |       | EAF   | European ancestry values as published |          | Present in ADVANCE? | Best ADVANCE Proxy | ADVANCE Effect Allele | Risk Factor | Ref     | Nb. of Ind |
|----------------|--------------|----------|-----------------------------------|--------------------------|------------------------|---------|-------|-------|---------------------------------------|----------|---------------------|--------------------|-----------------------|-------------|---------|------------|
|                |              |          |                                   |                          |                        | Effect  | Other |       | $\beta$                               | p-value  |                     |                    |                       |             |         |            |
|                |              |          |                                   |                          |                        |         |       |       |                                       |          |                     |                    |                       |             |         |            |
|                | rs11191548   | 10       | 104719096                         | CNNM2 (near NT5C2)       | Non coding             | T       | C     | 0.91  | 1.095                                 | 6.90E-26 | No                  | rs12413409         | G                     | SBP         | (42)    | 161 709    |
|                | rs7129220    | 11       | 10350538                          | ADM-AMPD3                |                        | G       | A     | 0.89  | 0.619                                 | 3.00E-12 | Yes                 |                    | A                     | SBP         | (42)    | 182 871    |
|                | rs381815     | 11       | 16902268                          | PLEKHA7                  | Intron                 | T       | C     | 0.26  | 0.575                                 | 5.30E-11 | Yes                 |                    | T                     | SBP         | (42)    | 97 159     |
|                | rs11442819   | 11       | 45213509                          | PRDM11                   | Intron                 | T       | Del   | 0.11  | 0.279                                 | 7.10E-09 | No                  | rs4755950          | C                     | PP          | (44)    | 326 483    |
|                | rs2289125    | 11       | 89224477                          | NOX4                     | 5'UTR                  | A       | C     | 0.21  | 0.377                                 | 9.10E-22 | No                  | rs2289124          | A                     | PP          | (44)    | 307 682    |
|                | rs633185     | 11       | 100593538                         | ARHGAP42                 | Intron                 | G       | C     | 0.28  | 0.565                                 | 1.20E-17 | Yes                 |                    | C                     | SBP         | (42)    | 160 461    |
|                | rs8258       | 11       | 117283676                         | CEP164                   | 3'UTR                  | T       | C     | 0.38  | 0.236                                 | 2.90E-13 | Yes                 |                    | T                     | PP          | (44)    | 327 038    |
| Blood pressure | rs11222084   | 11       | 130273230                         | ZBTB44-DT (near ADAMTS8) | Non coding             | T       | A     | 0.38  | 0.337                                 | 1.90E-11 | Yes                 |                    | T                     | PP          | (45)    | 108 095    |
|                | rs10770612   | 12       | 20230639                          | LOC100506393             | Intron                 | A       | G     | 0.80  | 0.313                                 | 7.00E-15 | Yes                 |                    | A                     | PP          | (44)    | 311 586    |
|                | rs73099903   | 12       | 53440779                          | TNS2, LOC283335          | 5'UTR, Intron          | C       | T     | 0.07  | 0.515                                 | 1.95E-10 | Yes                 |                    | C                     | SBP         | (43)    | 343 318    |
|                | rs7312464    | 12       | 66374247                          | HMG2-LLPH                |                        | G       | A     | 0.52  | 0.210                                 | 5.00E-10 | Yes                 |                    | G                     | PP          | (44)    | 289 978    |
|                | rs17249754   | 12       | 90008959                          | ATP2B1                   | Intron                 | G       | A     | 0.84  | 0.928                                 | 1.80E-18 | No                  | rs2681472          | G                     | SBP         | (42)    | 96 425     |
|                | rs139236208  | 12       | 94872851                          | LOC102724960             | Intron                 | A       | G     | 0.10  | 0.363                                 | 1.60E-10 | No                  | rs140802080        | A                     | PP          | (44)    | 291 244    |
|                | rs3184504    | 12       | 111865049                         | SH2B3                    | Exon non-syn           |         | C     | 0.47  | 0.523                                 | 2.60E-06 | No                  | rs7310615          | C                     | HTN         | (42)    | 120 574    |
|                | rs3184504    | 12       | 111865049                         | SH2B3                    | Exon non-syn.          | T       | C     | 0.47  | 0.598                                 | 3.80E-18 | No                  | rs7310615          | C                     | SBP         | (42)    | 120 574    |
|                | rs10850411   | 12       | 115387796                         | TBX3-MED13L              |                        | T       | C     | 0.7   | 0.354                                 | 5.40E-08 | Yes                 |                    | T                     | SBP         | (42)    | 161 142    |
|                | rs12434998   | 14       | 94455554                          | LOC107984663             | Intron                 | C       | T     | 0.37  | 0.189                                 | 2.00E-08 | Yes                 |                    | C                     | PP          | (44)    | 315 683    |
|                | rs9323988    | 14       | 98594361                          | LOC105370655             | Intron                 | T       | C     | 0.63  | 0.212                                 | 4.10E-11 | No                  | rs8018617          | A                     | PP          | (44)    | 327 551    |
|                | rs1378942    | 15       | 75077367                          | CSK                      | Intron                 | C       | A     | 0.35  | 0.613                                 | 5.70E-23 | Yes                 |                    | C                     | SBP         | (42)    | 163 124    |
|                | rs56249585   | 16       | 65286187                          | CDH11-LINC00922          |                        | T       | C     | 0.53  | 0.183                                 | 9.00E-09 | No                  | rs9931601          | C                     | PP          | (44)    | 318 082    |
|                | rs7500448    | 16       | 83045790                          | CDH13                    | Intron                 | A       | G     | 0.75  | 0.329                                 | 1.10E-19 | Yes                 |                    | A                     | PP          | (44)    | 321 958    |
|                | rs7226020    | 17       | 6473353                           | PITPNM3-KIAA0753         |                        | T       | C     | 0.56  | 0.256                                 | 2.30E-14 | No                  | rs930526           | C                     | PP          | (44)    | 303 389    |
|                | rs62080325   | 17       | 42060631                          | PYY                      | Intron                 | A       | G     | 0.66  | 0.186                                 | 4.00E-08 | Yes                 |                    | A                     | PP          | (44)    | 315 689    |
|                | rs17608766   | 17       | 45013271                          | GOSR2                    | Intron                 | T       | C     | 0.86  | 0.556                                 | 1.10E-10 | Yes                 |                    | C                     | SBP         | (42)    | 151 810    |
|                | rs12940887   | 17       | 47402807                          | ZNF652                   | Intron                 | T       | C     | 0.38  | 0.362                                 | 1.80E-10 | Yes                 |                    | T                     | SBP         | (42)    | 188 184    |
|                | rs57927100   | 17       | 75317932                          | SEPT9                    | Intron                 | C       | G     | 0.26  | 0.310                                 | 4.04E-10 | No                  | rs77946446         | T                     | SBP         | (43)    | 347 188    |
|                | rs7236548    | 18       | 43095231                          | SLC14A2                  | Intron                 | A       | C     | 0.18  | 0.352                                 | 2.00E-18 | No                  | rs7245140          | C                     | PP          | (44)    | 330 075    |
|                | rs2116941    | 19       | 10372360                          | S1PR2                    | 3'UTR                  | C       | A     | 0.81  | 0.220                                 | 3.00E-08 | No                  | rs200688233        | G                     | PP          | (44)    | 321 960    |
|                | rs2206815    | 20       | 10658882                          | JAG1-C20orf187           |                        | A       | C     | 0.50  | 0.326                                 | 5.00E-25 | No                  | rs6040076          | G                     | PP          | (44)    | 324 088    |
|                | rs1327235    | 20       | 10969030                          | C20orf187                | Intron                 | G       | A     | 0.46  | 0.340                                 | 1.90E-08 | Yes                 |                    | G                     | SBP         | (42)    | 158 478    |
|                | rs6081613    | 20       | 19461866                          | SLC24A3                  | Intron                 | A       | G     | 0.28  | 0.263                                 | 1.60E-13 | No                  | rs3838376          | C                     | PP          | (44)    | 315 546    |
|                | rs6015450    | 20       | 57713314                          | ZNF831                   | Intron                 | A       | G     | 0.28  | 0.727                                 | 3.90E-23 | No                  | rs8116295          | A                     | HTN         | (42)    | 159 190    |
|                | rs6015450    | 20       | 57713314                          | ZNF831                   | Intron                 | G       | A     | 0.12  | 0.896                                 | 3.90E-23 | No                  | rs8116295          | A                     | SBP         | (42)    | 159 190    |
| rs12628032     | 22           | 19967980 | ARVCF                             | Intron                   | T                      | C       | 0.30  | 0.240 | 5.50E-12                              | Yes      |                     | T                  | PP                    | (44)        | 267 722 |            |
| rs73161324     | 22           | 42038786 | XRCC6                             | Intron                   | T                      | C       | 0.05  | 0.496 | 2.80E-11                              | Yes      |                     | T                  | PP                    | (44)        | 310 292 |            |
|                | rs12037222   | 1        | 40060025                          | PABPC4-HEYL              |                        | A       | G     | 0.24  | 0.045                                 | 6.40E-11 | No                  | rs76841360         | A                     | CRP         | (46)    | 82 725     |

Electronic Supplementary Material J. Tremblay et al.

| Risk Group        | Original SNP | Chr       | Position of original SNP (GRCh37) | Locus (Gene)        | Functional Consequence | Alleles |       | EAF  | European ancestry values as published |           | Present in ADVANCE? | Best ADVANCE Proxy | ADVANCE Effect Allele | Risk Factor | Ref  | Nb. of Ind |        |
|-------------------|--------------|-----------|-----------------------------------|---------------------|------------------------|---------|-------|------|---------------------------------------|-----------|---------------------|--------------------|-----------------------|-------------|------|------------|--------|
|                   |              |           |                                   |                     |                        | Effect  | Other |      | $\beta$                               | p-value   |                     |                    |                       |             |      |            |        |
| Biomarkers Levels | rs4420065    | 1         | 66161461                          | LEPR-PDE4B          |                        | C       | T     | 0.61 | 0.090                                 | 3.50E-62  | Yes                 |                    | C                     | CRP         | (46) | 82 725     |        |
|                   | rs4129267    | 1         | 154426264                         | IL6R                | Intron                 | C       | T     | 0.60 | 0.079                                 | 2.10E-48  | Yes                 |                    | C                     | CRP         | (46) | 82 725     |        |
|                   | rs2794520    | 1         | 159678816                         | APCS-CRP            |                        | C       | T     | 0.66 | 0.160                                 | 2.00E-186 | Yes                 |                    | C                     | CRP         | (46) | 82 725     |        |
| Biomarkers Levels | rs12239046   | 1         | 247601595                         | NLRP3               | Intron                 | C       | T     | 0.61 | 0.047                                 | 1.20E-15  | Yes                 |                    | C                     | CRP         | (46) | 82 725     |        |
|                   | rs1260326    | 2         | 27741237                          | GCKR                | Exon non-syn.          | T       | C     | 0.41 | 0.072                                 | 4.60E-40  | No                  | rs780094           | T                     | CRP         | (46) | 82 725     |        |
|                   | rs6734238    | 2         | 113841030                         | IL1F10-IL1RN        |                        | G       | A     | 0.42 | 0.050                                 | 1.80E-17  | Yes                 |                    | G                     | CRP         | (46) | 82 725     |        |
|                   | rs511154     | 3         | 138104635                         | MSL2-PCCB           |                        | A       | G     | 0.23 | 0.045                                 | 5.94E-10  | No                  | rs34905952         | A                     | Fibri       | (47) | 21 901     |        |
|                   | rs1800789    | 4         | 155482743                         | FGB                 | Upstream 2KB           | A       | G     | 0.20 | 0.087                                 | 1.75E-30  | Yes                 |                    | A                     | Fibri       | (47) | 22 096     |        |
|                   | rs2522056    | 5         | 131801726                         | C5orf56 (near IRF1) | Intron                 | G       | A     | 0.20 | 0.063                                 | 1.31E-15  | Yes                 |                    | G                     | Fibri       | (47) | 22 096     |        |
|                   | rs4705952    | 5         | 131839618                         | IRF1-IL5            |                        | G       | A     | 0.20 | 0.042                                 | 1.30E-08  | Yes                 |                    | G                     | CRP         | (46) | 82 725     |        |
|                   | rs6901250    | 6         | 117114025                         | GPRC6A              | Exon syn.              | G       | A     | 0.30 | 0.035                                 | 4.80E-08  | Yes                 |                    | A                     | CRP         | (46) | 82 725     |        |
|                   | rs13233571   | 7         | 72982874                          | BCL7B               | Intron                 | C       | T     | 0.86 | 0.054                                 | 3.60E-09  | No                  | rs17145738         | C                     | CRP         | (46) | 82 725     |        |
|                   | rs9987289    | 8         | 9181395                           | LOC157273           | Intron                 | A       | G     | 0.10 | 0.069                                 | 3.40E-13  | No                  | rs2169387          | A                     | CRP         | (46) | 82 725     |        |
|                   | rs10745954   | 12        | 103483094                         | C12orf42            | Intron                 | A       | G     | 0.50 | 0.039                                 | 1.60E-11  | Yes                 |                    | A                     | CRP         | (46) | 82 725     |        |
|                   | rs1183910    | 12        | 121416988                         | HNF1A               | Intron                 | G       | A     | 0.67 | 0.149                                 | 2.10E-124 | No                  | rs2244608          | G                     | CRP         | (46) | 82 725     |        |
|                   | rs340029     | 15        | 60894965                          | RORA, RORA-AS1      | Intron, Intron         | T       | C     | 0.62 | 0.032                                 | 4.10E-09  | Yes                 |                    | T                     | CRP         | (46) | 82 725     |        |
|                   | rs2847281    | 18        | 12821593                          | PTPN2               | Intron                 | A       | G     | 0.80 | 0.031                                 | 2.20E-08  | Yes                 |                    | A                     | CRP         | (46) | 82 725     |        |
|                   | rs4420638    | 19        | 45422946                          | APOC1               | Downstream 500B        | A       | G     | 0.80 | 0.236                                 | 8.80E-139 | Yes                 |                    | A                     | CRP         | (46) | 82 725     |        |
| Lipids            | rs12027135   | 1         | 25775733                          | TMEM57              | Intron                 | A       | T     | 0.45 | 1.220                                 | 4.00E-11  | Yes                 |                    | A                     | TC          | (48) | 100 184    |        |
|                   | rs4660293    | 1         | 40028180                          | PABPC4              | Intron                 | G       | A     | 0.23 | 0.480                                 | 4.00E-10  | Yes                 |                    | G                     | HDL         | (48) | 99 855     |        |
|                   | rs2479409    | 1         | 55504650                          | PCSK9               | Upstream 2KB           | G       | A     | 0.30 | 2.010                                 | 2.00E-28  | Yes                 |                    | G                     | LDL         | (48) | 95 435     |        |
|                   | rs2131925    | 1         | 63025942                          | DOCK7               | Intron                 | T       | G     | 0.68 | 4.940                                 | 9.00E-43  | Yes                 |                    | T                     | TG          | (48) | 96 598     |        |
|                   | rs7515577    | 1         | 93014343                          | EVI5                | Intron                 | A       | C     | 0.79 | 1.180                                 | 3.00E-08  | No                  | rs145341911        | A                     | TC          | (48) | 100 165    |        |
|                   | rs629301     | 1         | 109818530                         | CELSR2              | 3'UTR                  | T       | G     | 0.78 | 5.650                                 | 1.00E-170 | No                  | rs646776           | T                     | LDL         | (48) | 95 454     |        |
|                   | rs1689800    | 1         | 182168885                         | ZNF648              | Intron                 | G       | A     | 0.35 | 0.470                                 | 3.00E-10  | Yes                 |                    | G                     | HDL         | (48) | 99 900     |        |
|                   | rs2642442    | 1         | 220973563                         | MARC1               | Intron                 | T       | C     | 0.68 | 1.390                                 | 6.00E-13  | Yes                 |                    | T                     | TC          | (48) | 100 098    |        |
|                   | rs4846914    | 1         | 230294715                         | GALNT2              | Intron                 | G       | A     | 0.40 | 0.610                                 | 4.00E-21  | No                  | rs4846913          | C                     | HDL         | (48) | 99 881     |        |
|                   | rs514230     | 1         | 234858597                         | IRF2BP2-TOMM20      |                        | T       | A     | 0.48 | 1.360                                 | 5.00E-14  | Yes                 |                    | T                     | TC          | (48) | 100 184    |        |
|                   | rs1367117    | 2         | 21263900                          | APOB                | Exon non-syn.          | A       | G     | 0.30 | 4.050                                 | 4.00E-114 | Yes                 |                    | A                     | LDL         | (48) | 95 446     |        |
|                   | rs4299376    | 2         | 44072576                          | ABCG8               | Intron                 | G       | T     | 0.30 | 2.750                                 | 2.00E-47  | Yes                 |                    | G                     | LDL         | (48) | 91 285     |        |
|                   | rs7570971    | 2         | 135837906                         | RAB3GAP1            | Intron                 | A       | C     | 0.34 | 1.250                                 | 2.00E-08  | Yes                 |                    | A                     | TC          | (48) | 95 242     |        |
|                   | rs2972146    | 2         | 227092802                         | NYAP2-IRS1          |                        | T       | G     | 0.63 | 0.460                                 | 3.00E-09  | No                  | rs2176040          | T                     | HDL         | (48) | 96 875     |        |
|                   | rs2290159    | 3         | 12628920                          | RAF1                | Intron                 | G       | C     | 7.80 | 1.420                                 | 4.00E-09  | Yes                 |                    | G                     | TC          | (48) | 99 434     |        |
|                   | rs645040     | 3         | 138104635                         | MSL2-PCCB           |                        | T       | G     | 0.78 | 2.220                                 | 3.00E-08  | No                  | rs34905952         | G                     | TG          | (48) | 96 597     |        |
|                   | rs442177     | 4         | 88030261                          | AFF1                | Intron                 | T       | G     | 0.59 | 2.250                                 | 9.00E-12  | Yes                 |                    | T                     | TG          | (48) | 96 598     |        |
|                   | rs6450176    | 5         | 53298025                          | ARL15               | Intron                 | A       | G     | 0.26 | 0.490                                 | 5.00E-08  | Yes                 |                    | A                     | HDL         | (48) | 99 900     |        |
|                   | Lipids       | rs9686661 | 5                                 | 55861786            | C5orf67                | Intron  | T     | C    | 0.20                                  | 2.570     | 1.00E-10            | Yes                |                       | T           | TG   | (48)       | 95 848 |

Electronic Supplementary Material J. Tremblay et al.

| Risk Group    | Original SNP | Chr       | Position of original SNP (GRCh37) | Locus (Gene) | Functional Consequence | Alleles |       | EAF    | European ancestry values as published |          | Present in ADVANCE? | Best ADVANCE Proxy | ADVANCE Effect Allele | Risk Factor | Ref     | Nb. of Ind |
|---------------|--------------|-----------|-----------------------------------|--------------|------------------------|---------|-------|--------|---------------------------------------|----------|---------------------|--------------------|-----------------------|-------------|---------|------------|
|               |              |           |                                   |              |                        | Effect  | Other |        | $\beta$                               | p-value  |                     |                    |                       |             |         |            |
|               |              |           |                                   |              |                        | rs12916 | 5     |        | 74656539                              | HMGCR    |                     |                    |                       |             |         |            |
| rs6882076     | 5            | 156394441 | TIMD4                             | Upstream 2KB | C                      | T       | 0.65  | 1.980  | 7.00E-28                              | No       | rs9715911           | A                  | TC                    | (48)        | 100 184 |            |
| rs3757354     | 6            | 16127407  | MYLIP                             | Upstream 2KB | C                      | T       | 0.78  | 1.430  | 1.00E-11                              | Yes      |                     | C                  | LDL                   | (48)        | 91 293  |            |
| rs3177928     | 6            | 32412435  | HLA-DRA                           | 3'UTR        | A                      | G       | 0.16  | 2.310  | 4.00E-19                              | Yes      |                     | A                  | TC                    | (48)        | 100 151 |            |
| rs2814944     | 6            | 34769765  | SPDEF-C6orf106                    |              | A                      | G       | 0.16  | 0.490  | 4.00E-09                              | No       | rs4472337           | T                  | HDL                   | (48)        | 99 811  |            |
| rs9488822     | 6            | 116312893 | FRK                               | Intron       | A                      | T       | 0.65  | 1.180  | 2.00E-10                              | Yes      |                     | A                  | TC                    | (48)        | 100 184 |            |
| rs605066      | 6            | 139835423 | CITED2-LOC105378023               |              | C                      | T       | 0.42  | 0.390  | 3.00E-08                              | No       | rs71562509          | G                  | HDL                   | (48)        | 99 900  |            |
| rs1564348     | 6            | 160578860 | SLC22A1                           | Intron       | T                      | C       | 0.83  | 0.560  | 2.00E-17                              | Yes      |                     | T                  | LDL                   | (48)        | 95 439  |            |
| rs12670798    | 7            | 21607352  | DNAH11                            | Intron       | C                      | T       | 0.23  | 1.430  | 9.00E-10                              | Yes      |                     | C                  | TC                    | (48)        | 100 184 |            |
| rs2072183     | 7            | 44582331  | NPC1L1                            | Exon syn.    | C                      | G       | 0.25  | 2.010  | 3.00E-11                              | No       | rs2073547           | G                  | TC                    | (48)        | 97 063  |            |
| rs17145738    | 7            | 72982874  | TBL2                              | Downstr.500B | C                      | T       | 0.88  | 9.320  | 6.00E-58                              | Yes      |                     | C                  | TG                    | (48)        | 96 598  |            |
| rs4731702     | 7            | 130466854 | LOC105375508 (near KLF14)         | Intron       | C                      | T       | 0.48  | 0.590  | 1.00E-15                              | No       | rs972283            | A                  | HDL                   | (48)        | 99 900  |            |
| rs11776767    | 8            | 10683929  | PINX1                             | Intron       | C                      | G       | 0.40  | 2.010  | 1.00E-08                              | Yes      |                     | C                  | TG                    | (48)        | 96 598  |            |
| rs1495741     | 8            | 18272881  | NAT2-PSD3                         |              | G                      | A       | 0.22  | 2.850  | 5.00E-14                              | Yes      |                     | G                  | TG                    | (48)        | 96 580  |            |
| rs12678919    | 8            | 19844222  | LPL-SLC18A1                       |              | A                      | G       | 0.88  | 13.640 | 2.00E-115                             | Yes      |                     | A                  | TG                    | (48)        | 96 598  |            |
| rs2081687     | 8            | 59388565  | UBXN2B-CYP7A1                     |              | T                      | C       | 0.35  | 1.230  | 2.00E-12                              | Yes      |                     | T                  | TC                    | (48)        | 100 184 |            |
| rs2293889     | 8            | 116599199 | TRPS1                             | Intron       | T                      | G       | 0.41  | 0.440  | 6.00E-11                              | Yes      |                     | T                  | HDL                   | (48)        | 99 900  |            |
| rs2954029     | 8            | 126481747 | TRIB1-LOC105375746                |              | A                      | T       | 0.47  | 5.640  | 3.00E-55                              | No       | rs2980875           | A                  | TG                    | (48)        | 96 598  |            |
| rs11136341    | 8            | 145043543 | PLEC1                             | Intron       | G                      | A       | 0.40  | 1.400  | 4.00E-13                              | Yes      |                     | G                  | LDL                   | (48)        | 88 376  |            |
| rs581080      | 9            | 15305378  | TTC39B                            | Intron       | G                      | C       | 0.18  | 0.650  | 3.00E-12                              | Yes      |                     | G                  | HDL                   | (48)        | 99 889  |            |
| rs1883025     | 9            | 107664301 | ABCA1                             | Intron       | T                      | C       | 0.25  | 0.940  | 2.00E-33                              | Yes      |                     | T                  | HDL                   | (48)        | 99 179  |            |
| rs9411489     | 9            | 133274414 | ABO-SURF6                         |              | T                      | C       | 0.20  | 2.240  | 6.00E-13                              | No       | rs532436            | A                  | LDL                   | (48)        | 95 454  |            |
| rs10761731    | 10           | 65027610  | JMJD1C                            | Intron       | A                      | T       | 0.57  | 2.380  | 3.00E-12                              | Yes      |                     | A                  | TG                    | (48)        | 96 598  |            |
| rs2255141     | 10           | 113933886 | GPAM                              | Intron       | A                      | G       | 0.30  | 1.140  | 2.00E-10                              | Yes      |                     | A                  | TC                    | (48)        | 100 184 |            |
| rs2923084     | 11           | 10388782  | LOC100130460                      | Intron       | G                      | A       | 0.17  | 0.410  | 5.00E-08                              | Yes      |                     | G                  | HDL                   | (48)        | 99 898  |            |
| rs10128711    | 11           | 18632984  | SPTY2D1                           | Intron       | C                      | T       | 0.72  | 1.040  | 3.00E-08                              | Yes      |                     | C                  | TC                    | (48)        | 100 184 |            |
| rs3136441     | 11           | 46724717  | F2                                | Intron       | T                      | C       | 0.85  | 0.780  | 3.00E-18                              | No       | rs148055528         | Ins                | HDL                   | (48)        | 99 900  |            |
| rs174546      | 11           | 61596633  | FADS1                             | 3'UTR        | T                      | C       | 0.34  | 3.820  | 5.00E-24                              | No       | rs99780             | T                  | TG                    | (48)        | 96 598  |            |
| rs964184      | 11           | 116648917 | ZPR1                              | 3'UTR        | G                      | C       | 0.13  | 16.950 | 7.00E-240                             | Yes      |                     | G                  | TG                    | (48)        | 96 576  |            |
| rs7941030     | 11           | 122522375 | BLID-UBASH3B                      |              | C                      | T       | 0.38  | 0.970  | 2.00E-10                              | Yes      |                     | C                  | TC                    | (48)        | 100 184 |            |
| rs11220462    | 11           | 126243952 | ST3GAL4                           | Intron       | A                      | G       | 0.14  | 1.950  | 1.00E-15                              | Yes      |                     | A                  | LDL                   | (48)        | 95 454  |            |
| <b>Lipids</b> | rs7134375    | 12        | 20473758                          | LOC105369688 | Non coding             | C       | A     | 0.58   | 0.400                                 | 4.00E-08 | Yes                 |                    | C                     | HDL         | (48)    | 99 900     |
|               | rs11613352   | 12        | 57738600                          | R3HDM2       | Intron                 | C       | T     | 0.77   | 2.700                                 | 4.00E-10 | No                  | rs79395356         | T                     | TG          | (48)    | 96 598     |
|               | rs7134594    | 12        | 110000193                         | MMAB         | Intron                 | C       | T     | 0.47   | 0.440                                 | 7.00E-15 | Yes                 |                    | C                     | HDL         | (48)    | 99 900     |
|               | rs1169288    | 12        | 121416988                         | HNF1A        | Exon non-syn.          | C       | A     | 0.33   | 1.420                                 | 1.00E-14 | No                  | rs2244608          | C                     | TC          | (48)    | 100 184    |
|               | rs4759375    | 12        | 123796238                         | SBNO1        | Intron                 | C       | T     | 0.94   | 0.860                                 | 7.00E-09 | Yes                 |                    | C                     | HDL         | (48)    | 99 900     |



Electronic Supplementary Material J. Tremblay et al.

| Risk Group    | Original SNP | Chr | Position of original SNP (GRCh37) | Locus (Gene)              | Functional Consequence | Alleles |       | EAF  | European ancestry values as published |          | Present in ADVANCE? | Best ADVANCE Proxy | ADVANCE Effect Allele | Risk Factor | Ref  | Nb. of Ind |
|---------------|--------------|-----|-----------------------------------|---------------------------|------------------------|---------|-------|------|---------------------------------------|----------|---------------------|--------------------|-----------------------|-------------|------|------------|
|               |              |     |                                   |                           |                        | Effect  | Other |      | $\beta$                               | p-value  |                     |                    |                       |             |      |            |
|               | rs4765127    | 12  | 124460167                         | ZNF664-FAM101A, ZNF664    | Intron, Intron         | G       | T     | 0.66 | 0.440                                 | 3.00E-10 | Yes                 |                    | G                     | HDL         | (48) | 99 787     |
|               | rs2929282    | 15  | 44259429                          | FRMD5                     | Intron                 | T       | A     | 0.05 | 5.130                                 | 2.00E-11 | No                  | rs34586661         | C                     | TG          | (48) | 95 070     |
|               | rs1532085    | 15  | 58683366                          | LOC101928635 (near LIPC)  | Intron                 | G       | A     | 0.39 | 1.450                                 | 3.00E-96 | Yes                 |                    | G                     | HDL         | (48) | 98 409     |
|               | rs11649653   | 16  | 30918487                          | CTF1-FBXL19               |                        | C       | G     | 0.60 | 2.130                                 | 3.00E-08 | Yes                 |                    | C                     | TG          | (48) | 95 034     |
|               | rs3764261    | 16  | 56989590                          | HERPUD1-CETP              |                        | C       | A     | 0.68 | 3.390                                 | 7.0E-380 | No                  | rs247616           | C                     | HDL         | (48) | 94 225     |
|               | rs16942887   | 16  | 67931826                          | PSKH1                     | Intron                 | G       | A     | 0.88 | 1.270                                 | 8.00E-33 | No                  | rs8054091          | A                     | HDL         | (48) | 98 409     |
|               | rs2000999    | 16  | 72108093                          | HPR, TXNL4B               | Intron, Intron         | A       | G     | 0.20 | 2.340                                 | 3.00E-24 | Yes                 |                    | A                     | TC          | (48) | 98 656     |
|               | rs2925979    | 16  | 81534790                          | CMIP                      | Intron                 | T       | C     | 0.30 | 0.450                                 | 2.00E-11 | Yes                 |                    | T                     | HDL         | (48) | 98 409     |
|               | rs11869286   | 17  | 37813856                          | STARD3                    | Intron                 | G       | C     | 0.34 | 0.480                                 | 1.00E-13 | Yes                 |                    | G                     | HDL         | (48) | 98 409     |
|               | rs7206971    | 17  | 45425115                          | EFCAB13                   | Intron                 | A       | G     | 0.49 | 0.780                                 | 2.00E-08 | Yes                 |                    | A                     | LDL         | (48) | 93 999     |
|               | rs4148008    | 17  | 66893172                          | ABCA8                     | Intron                 | G       | C     | 0.32 | 0.420                                 | 2.00E-10 | No                  | rs8065105          | G                     | HDL         | (48) | 98 409     |
|               | rs4129767    | 17  | 76403984                          | PGS1                      | Intron                 | G       | A     | 0.51 | 0.390                                 | 8.00E-09 | Yes                 |                    | G                     | HDL         | (48) | 98 409     |
|               | rs7241918    | 18  | 47160953                          | LOC105372112              | Intron                 | G       | T     | 0.17 | 1.310                                 | 3.00E-49 | Yes                 |                    | G                     | HDL         | (48) | 98 409     |
|               | rs12967135   | 18  | 57839769                          | CCBE1-CDH20               |                        | A       | G     | 0.23 | 0.420                                 | 7.00E-09 | No                  | rs571312           | A                     | HDL         | (48) | 98 409     |
|               | rs737337     | 19  | 11347493                          | DOCK6                     | Exon syn.              | C       | T     | 0.08 | 0.640                                 | 3.00E-09 | Yes                 |                    | C                     | HDL         | (48) | 98 409     |
|               | rs10401969   | 19  | 19407718                          | SUGP1                     | Intron                 | T       | C     | 0.93 | 4.740                                 | 3.00E-38 | Yes                 |                    | T                     | TC          | (48) | 98 640     |
|               | rs2277862    | 20  | 34152782                          | FER1L4                    | Non coding             | C       | T     | 0.85 | 1.190                                 | 4.00E-10 | Yes                 |                    | C                     | TC          | (48) | 98 656     |
|               | rs2902940    | 20  | 39091487                          | LOC105372618              | Intron                 | A       | G     | 0.71 | 1.380                                 | 6.00E-11 | Yes                 |                    | A                     | TC          | (48) | 98 656     |
|               | rs6029526    | 20  | 39672618                          | TOP1                      | Intron                 | A       | T     | 0.47 | 1.390                                 | 4.00E-19 | Yes                 |                    | A                     | LDL         | (48) | 93 999     |
|               | rs6065906    | 20  | 44590298                          | PLTP-PCIF1                |                        | C       | T     | 0.18 | 0.930                                 | 2.00E-22 | No                  | rs6073972          | G                     | HDL         | (48) | 98 409     |
|               | rs181362     | 22  | 21982249                          | UBE2L3                    | Intron                 | T       | C     | 0.20 | 0.460                                 | 1.00E-08 | No                  | rs878825           | C                     | HDL         | (48) | 96 905     |
|               | rs5756931    | 22  | 38546033                          | PLA2G6                    | Intron                 | T       | C     | 0.60 | 1.540                                 | 4.00E-08 | Yes                 |                    | T                     | TG          | (48) | 95 067     |
| <b>Stroke</b> | rs225132     | 1   | 8095500                           | ERRFI1-SLC45A1            |                        | T       | G     | NR   | 0.117                                 | 6.40E-08 | Yes                 |                    | T                     | Stroke      | (49) | 74 393     |
|               | rs17114036   | 1   | 56962821                          | PPAP2B                    | intron                 | A       | G     | NR   | 0.139                                 | 9.78E-09 | Yes                 |                    | A                     | Stroke      | (49) | 109 124    |
|               | rs602633     | 1   | 109821511                         | CELSR2-PSRC1              |                        | G       | T     | NR   | 0.105                                 | 1.42E-08 | Yes                 |                    | G                     | Stroke      | (49) | 109 124    |
|               | rs12122341   | 1   | 115655690                         | TSPAN2-NGF                |                        | G       | C     | 0.26 | 0.174                                 | 1.00E-09 | Yes                 |                    | G                     | Stroke      | (50) | 435 001    |
|               | rs1800594    | 1   | 169510524                         | F5                        | Exon syn.              | A       | G     | 0.69 | 0.166                                 | 2.26E-06 | Yes                 |                    | A                     | Stroke      | (51) | 19 730     |
| <b>Stroke</b> | rs13407662   | 2   | 53779789                          | LOC105369165-ASB3         |                        | T       | C     | 0.04 | 0.668                                 | 5.18E-08 | No                  | rs67499383         | T                     | Stroke      | (52) | 74 393     |
|               | rs6725887    | 2   | 203745885                         | WDR12                     | Intron                 | C       | T     | NR   | 0.131                                 | 2.37E-08 | Yes                 |                    | C                     | Stroke      | (49) | 109 124    |
|               | rs9818870    | 3   | 138104635                         | MRAS                      | 3'UTR                  | T       | C     | NR   | 0.104                                 | 1.24E-07 | No                  | rs34905952         | A                     | Stroke      | (49) | 109 124    |
|               | rs16851055   | 3   | 140799213                         | SPSB4                     | 3'UTR                  | G       | A     | 0.81 | 0.113                                 | 6.34E-07 | Yes                 |                    | G                     | Stroke      | (52) | 74 393     |
|               | rs2200733    | 4   | 111710169                         | PITX2-MIR297              |                        | T       | C     | 0.12 | 0.315                                 | 2.79E-32 | Yes                 |                    | T                     | Stroke      | (50) | 435 001    |
|               | rs1906599    | 4   | 111712686                         | PITX2-MIR297              |                        | T       | C     | 0.19 | 0.372                                 | 3.45E-08 | Yes                 |                    | T                     | Stroke      | (53) | 50 978     |
|               | rs9369640    | 6   | 12927544                          | PHACTR1                   | intron                 | A       | C     | NR   | 0.094                                 | 2.69E-11 | No                  | rs12526453         | C                     | Stroke      | (49) | 109 124    |
|               | rs12205331   | 6   | 34898455                          | ANKS1A                    | intron                 | C       | T     | NR   | 0.073                                 | 6.39E-06 | Yes                 |                    | C                     | Stroke      | (49) | 109 124    |
|               | rs556621     | 6   | 44594159                          | LOC105375075-LOC101929770 |                        | A       | C     | 0.30 | 0.191                                 | 4.70E-08 | Yes                 |                    | A                     | Stroke      | (54) | 56 075     |

Electronic Supplementary Material J. Tremblay et al.

| Risk Group     | Original SNP | Chr | Position of original SNP (GRCh37) | Locus (Gene)                  | Functional Consequence | Alleles |       | EAF  | European ancestry values as published |          | Present in ADVANCE? | Best ADVANCE Proxy | ADVANCE CE Effect Allele | Risk Factor | Ref  | Nb. of Ind |
|----------------|--------------|-----|-----------------------------------|-------------------------------|------------------------|---------|-------|------|---------------------------------------|----------|---------------------|--------------------|--------------------------|-------------|------|------------|
|                |              |     |                                   |                               |                        | Effect  | Other |      | $\beta$                               | p-value  |                     |                    |                          |             |      |            |
|                |              |     |                                   |                               |                        |         |       |      |                                       |          |                     |                    |                          |             |      |            |
|                | rs783396     | 6   | 106987370                         | AIM1                          | Exon non-syn.          | C       | A     | 0.90 | 0.775                                 | 9.24E-06 | Yes                 |                    | C                        | Stroke      | (55) | 517        |
|                | rs12190287   | 6   | 134214525                         | TCF21                         | 3'UTR                  | C       | T     | NR   | 0.105                                 | 2.32E-09 | Yes                 |                    | C                        | Stroke      | (49) | 109 124    |
|                | rs2048327    | 6   | 160867159                         | SLC22A3                       | Intron                 | C       | T     | NR   | 0.068                                 | 1.34E-06 | No                  | rs9355288          | A                        | Stroke      | (49) | 109 124    |
|                | rs10486776   | 7   | 15742786                          | LOC101927558                  | Intron                 | A       | G     | 0.10 | 1.726                                 | 6.00E-06 | Yes                 |                    | A                        | Stroke      | (55) | 517        |
|                | rs2107595    | 7   | 19049388                          | HDAC9-TWIST1                  |                        | A       | G     | 0.16 | 0.329                                 | 2.03E-16 | Yes                 |                    | A                        | Stroke      | (52) | 74 393     |
|                | rs11556924   | 7   | 129663496                         | ZC3HC1                        | Exon non-syn.          | C       | T     | NR   | 0.094                                 | 2.66E-10 | Yes                 |                    | C                        | Stroke      | (49) | 74 393     |
|                | rs264        | 8   | 19813180                          | LPL                           | intron                 | G       | A     | NR   | 0.105                                 | 2.92E-07 | Yes                 |                    | G                        | Stroke      | (49) | 109 124    |
|                | rs1333047    | 9   | 22124504                          | CDKN2B-AS1-DMRTA1             |                        | T       | A     | NR   | 0.182                                 | 1.64E-06 | Yes                 |                    | T                        | Stroke      | (49) | 74 393     |
|                | rs1746048    | 10  | 44775824                          | LINC00841-CXCL12              |                        | C       | T     | 0.84 | 0.131                                 | 8.14E-11 | Yes                 |                    | C                        | Stroke      | (56) | 24 864     |
|                | rs12413409   | 10  | 104719096                         | CNNM2                         | intron                 | G       | A     | NR   | 0.117                                 | 1.24E-06 | Yes                 |                    | G                        | Stroke      | (49) | 109 124    |
|                | rs11196288   | 10  | 115056097                         | LOC105378489-<br>LOC105378490 |                        | G       | A     | 0.05 | 0.344                                 | 1.50E-08 | No                  | rs7906302          | G                        | Stroke      | (51) | 19 730     |
|                | rs9326246    | 11  | 116611733                         | LOC101929011-BUD13            |                        | C       | G     | NR   | 0.140                                 | 3.40E-07 | Yes                 |                    | C                        | Stroke      | (49) | 109 124    |
|                | rs12425791   | 12  | 775199                            | LOC105369597 (near<br>NINJ2)  | Non coding             | A       | G     | 0.23 | 0.239                                 | 1.00E-09 | No                  | rs11833579         | A                        | Stroke      | (57) | 2 196      |
|                | rs3184504    | 12  | 111865049                         | SH2B3                         | Exon non-syn.          | T       | C     | NR   | 0.068                                 | 9.33E-07 | No                  | rs7310615          | C                        | Stroke      | (49) | 109 124    |
|                | rs2238151    | 12  | 112211833                         | ALDH2                         | Intron                 | T       | C     | 0.66 | 0.122                                 | 1.03E-06 | Yes                 |                    | T                        | Stroke      | (52) | 74 393     |
|                | rs17696736   | 12  | 112553032                         | NAA25                         | Intron                 | G       | A     | NR   | 0.095                                 | 5.96E-08 | No                  | rs10850001         | A                        | Stroke      | (49) | 74 393     |
|                | rs4304924    | 13  | 79238925                          | RNF219-LINC00331              |                        | A       | G     | NR   | 0.163                                 | 4.50E-06 | Yes                 |                    | A                        | Stroke      | (49) | 74 393     |
|                | rs12435908   | 14  | 66121468                          | FUT8                          | Intron                 | A       | C     | 0.93 | 0.255                                 | 7.19E-06 | Yes                 |                    | A                        | Stroke      | (51) | 19 730     |
|                | rs1005224    | 14  | 76173860                          | TTLL5                         | intron                 | A       | T     | NR   | 0.186                                 | 1.47E-06 | Yes                 |                    | A                        | Stroke      | (49) | 74 393     |
|                | rs1465330    | 14  | 77600584                          | ZDHHC22                       | intron                 | A       | T     | NR   | 0.174                                 | 3.78E-06 | No                  | rs963474           | G                        | Stroke      | (49) | 74 393     |
|                | rs7173743    | 15  | 79141784                          | ADAMTS7-MORF4L1               |                        | T       | C     | NR   | 0.073                                 | 6.70E-08 | Yes                 |                    | T                        | Stroke      | (49) | 109 124    |
|                | rs7193343    | 16  | 73029160                          | ZFH3                          | Intron                 | T       | C     | 0.17 | 0.157                                 | 2.29E-10 | Yes                 |                    | T                        | Stroke      | (50) | 435 001    |
| Stroke         | rs879324     | 16  | 73068678                          | ZFH3                          | Intron                 | A       | G     | 0.19 | 0.223                                 | 2.28E-08 | Yes                 |                    | A                        | Stroke      | (52) | 74 393     |
|                | rs2281727    | 17  | 2117945                           | SMG6                          | Intron                 | G       | A     | NR   | 0.068                                 | 1.07E-07 | Yes                 |                    | G                        | Stroke      | (49) | 109 124    |
|                | rs4792143    | 17  | 11385890                          | SHISA6                        | intron                 | C       | T     | NR   | 0.094                                 | 5.07E-06 | Yes                 |                    | C                        | Stroke      | (49) | 74 393     |
|                | rs12936587   | 17  | 17543722                          | PEMT-RAI1                     |                        | G       | A     | NR   | 0.073                                 | 1.98E-07 | Yes                 |                    | G                        | Stroke      | (49) | 109 124    |
|                | rs6565653    | 17  | 78201783                          | SLC26A11                      | Intron                 | T       | G     | 0.46 | 0.182                                 | 5.51E-07 | Yes                 |                    | T                        | Stroke      | (51) | 19 730     |
|                | rs1122608    | 19  | 11179709                          | SMARCA4                       | Intron                 | G       | T     | 0.75 | 0.128                                 | 3.32E-11 | No                  | rs73013202         | C                        | Stroke      | (49) | 109 124    |
|                | rs9982601    | 21  | 35599128                          | LINC00310-KCNE2               |                        | T       | C     | NR   | 0.166                                 | 2.52E-10 | Yes                 |                    | T                        | Stroke      | (49) | 109 124    |
| Cardiovascular | rs11206510   | 1   | 55496039                          | BSND-PCSK9                    |                        | T       | C     | 0.81 | 0.140                                 | 9.60E-09 | Yes                 |                    | T                        | MI          | (56) | 25 538     |
|                | rs9970807    | 1   | 56965664                          | PLPP3                         | Intron                 | C       | T     | 0.92 | 0.113                                 | 1.79E-09 | No                  | rs17114036         | A                        | MI          | (58) | 171 873    |
|                | rs56170783   | 1   | 57016731                          | PLPP3                         | Intron                 | A       | C     | 0.92 | 0.104                                 | 2.10E-12 | No                  | rs17114036         | A                        | CAD         | (59) | 336 000    |
|                | rs646776     | 1   | 109818530                         | CELSR2                        | Downstr. 500B          | T       | C     | 0.81 | 0.174                                 | 7.90E-12 | Yes                 |                    | T                        | MI          | (56) | 25 538     |
|                | rs646776     | 1   | 109818530                         | CELSR2                        | Downstr. 500B          | T       | C     | 0.81 | 0.157                                 | 9.36E-11 | Yes                 |                    | T                        | CAD         | (56) | 24 864     |
|                | rs11810571   | 1   | 151770138                         | TDRKH                         | Intron                 | G       | C     | 0.79 | 0.055                                 | 4.24E-08 | No                  | rs4845579          | C                        | CAD         | (59) | 345 035    |
|                | rs6689306    | 1   | 154395946                         | IL6R                          | Intron                 | A       | G     | 0.44 | 0.049                                 | 1.50E-09 | No                  | rs12118721         | T                        | CAD         | (59) | 336 000    |



Electronic Supplementary Material J. Tremblay et al.

| Risk Group     | Original SNP | Chr | Position of original SNP (GRCh37) | Locus (Gene)              | Functional Consequence | Alleles |       | EAF  | European ancestry values as published |          | Present in ADVANCE? | Best ADVANCE Proxy | ADVANCE Effect Allele | Risk Factor | Ref  | Nb. of Ind |
|----------------|--------------|-----|-----------------------------------|---------------------------|------------------------|---------|-------|------|---------------------------------------|----------|---------------------|--------------------|-----------------------|-------------|------|------------|
|                |              |     |                                   |                           |                        | Effect  | Other |      | $\beta$                               | p-value  |                     |                    |                       |             |      |            |
|                |              |     |                                   |                           |                        |         |       |      |                                       |          |                     |                    |                       |             |      |            |
|                | rs12118721   | 1   | 154397416                         | IL6R                      | Intron                 | T       | C     | 0.48 | 0.058                                 | 1.17E-07 | Yes                 |                    | T                     | MI          | (58) | 171 874    |
|                | rs13376333   | 1   | 154814353                         | KCNN3                     | Intron                 | T       | C     | 0.30 | 0.445                                 | 6.30E-12 | Yes                 |                    | T                     | AF          | (60) | 14 179     |
|                | rs10911021   | 1   | 182073820                         | ZNF648, LOC105371642      | Intron, Intron         | C       | T     | 0.68 | 0.307                                 | 2.04E-08 | No                  | rs61063076         | C                     | CHD         | (61) | 6 562      |
|                | rs17465637   | 1   | 222823529                         | MIA3                      | Intron                 | C       | A     | 0.72 | 0.131                                 | 1.40E-09 | Yes                 |                    | C                     | MI          | (56) | 25 538     |
|                | rs17465637   | 1   | 222823529                         | MIA3                      | Intron                 | C       | A     | 0.72 | 0.122                                 | 1.33E-08 | Yes                 |                    | C                     | CAD         | (56) | 24 864     |
|                | rs67180937   | 1   | 222823743                         | MIA3                      | Intron                 | G       | T     | 0.68 | 0.068                                 | 8.50E-14 | Yes                 |                    | G                     | CAD         | (59) | 336 000    |
|                | rs585967     | 2   | 21270554                          | APOB-TDRD15               |                        | C       | A     | 0.84 | 0.068                                 | 2.80E-08 | Yes                 |                    | C                     | CAD         | (59) | 336 000    |
|                | rs4299376    | 2   | 44072576                          | ABCG8 (near ABCG5)        | Intron                 | G       | T     | 0.32 | 0.058                                 | 5.70E-10 | Yes                 |                    | G                     | CAD         | (59) | 336 000    |
|                | rs10176176   | 2   | 85762048                          | SH2D6-MAT2A               |                        | T       | A     | 0.47 | 0.068                                 | 2.88E-10 | Yes                 |                    | T                     | MI          | (58) | 171 874    |
|                | rs7568458    | 2   | 85788175                          | GGCX                      | Intron                 | A       | T     | 0.45 | 0.058                                 | 2.40E-13 | Yes                 |                    | A                     | CAD         | (59) | 336 000    |
|                | rs17678683   | 2   | 145286559                         | LINC01412 (near ZEB2)     | Intron                 | G       | T     | 0.09 | 0.077                                 | 1.20E-07 | Yes                 |                    | G                     | CAD         | (59) | 336 000    |
|                | rs6725887    | 2   | 203745885                         | WDR12                     | Intron                 | C       | T     | 0.14 | 0.157                                 | 1.30E-08 | Yes                 |                    | C                     | MI          | (56) | 25 538     |
|                | rs114123510  | 2   | 203831212                         | CARF                      | Intron                 | A       | T     | 0.12 | 0.122                                 | 2.90E-19 | No                  | rs6725887          | C                     | CAD         | (59) | 336 000    |
|                | rs1250229    | 2   | 216300185                         | FN1-LOC102724849          |                        | T       | C     | 0.26 | 0.069                                 | 2.77E-13 | No                  | rs1250258          | T                     | CAD         | (59) | 270 189    |
|                | rs13003675   | 2   | 233584109                         | GIGYF2                    | Intron                 | T       | C     | 0.36 | 0.039                                 | 1.70E-06 | Yes                 |                    | T                     | CAD         | (59) | 336 000    |
|                | rs7623687    | 3   | 49448566                          | RHOA, TCTA                | Intron, Upstr. 2KB     | A       | C     | 0.86 | 0.073                                 | 3.44E-10 | Yes                 |                    | A                     | CAD         | (59) | 333 836    |
|                | rs142695226  | 3   | 124475201                         | UMPS-ITGB5                |                        | G       | T     | 0.14 | 0.069                                 | 1.53E-09 | Yes                 |                    | G                     | CAD         | (59) | 345 188    |
|                | rs12493885   | 3   | 153863505                         | ARHGEF26                  | Exon non-syn.          | C       | G     | 0.87 | 0.070                                 | 3.16E-08 | No                  | rs1713822          | G                     | CAD         | (59) | 251 805    |
|                | rs72627509   | 4   | 57839051                          | NOA1                      | Intron                 | G       | C     | 0.20 | 0.058                                 | 8.10E-08 | Yes                 |                    | G                     | CAD         | (59) | 336 000    |
| Cardiovascular | rs10857147   | 4   | 81164723                          | PRDM8-FGF5                |                        | T       | A     | 0.27 | 0.053                                 | 5.66E-09 | No                  | rs1458038          | T                     | CAD         | (59) | 345 133    |
|                | rs17042171   | 4   | 111710169                         | PITX2-LOC729065           |                        | A       | C     | 0.15 | 0.501                                 | 6.00E-27 | No                  | rs2200733          | T                     | AF          | (62) | 40 518     |
|                | rs7678555    | 4   | 120900282                         | LOC100996694-MAD2L1       |                        | C       | A     | 0.28 | 0.051                                 | 1.32E-08 | No                  | rs13134800         | T                     | CAD         | (59) | 345 126    |
|                | rs4593108    | 4   | 148276400                         | MIR548G-EDNRA             |                        | C       | G     | 0.80 | 0.068                                 | 3.75E-07 | No                  | rs2059904          | A                     | MI          | (58) | 166 765    |
|                | rs6841581    | 4   | 148427503                         | EDNRA                     | Upstream 2KB           | A       | G     | 0.15 | 0.068                                 | 4.60E-10 | No                  | rs78049276         | C                     | CAD         | (59) | 336 000    |
|                | rs2306556    | 4   | 156638573                         | GUCY1A3                   | Intron                 | A       | G     | 0.82 | 0.068                                 | 1.20E-09 | No                  | rs72689147         | G                     | CAD         | (59) | 336 000    |
|                | rs72689147   | 4   | 156639888                         | GUCY1A3                   | Intron                 | G       | T     | 0.82 | 0.077                                 | 1.63E-08 | Yes                 |                    | G                     | MI          | (58) | 171 874    |
|                | rs7692395    | 4   | 183624937                         | TENM3                     | Intron                 | G       | T     | NR   | 0.371                                 | 2.50E-07 | No                  | rs9784414          | G                     | MI          | (63) | 64 297     |
|                | rs9349379    | 6   | 12903957                          | PHACTR1                   | Intron                 | G       | A     | 0.41 | 0.104                                 | 1.00E-35 | Yes                 |                    | G                     | CAD         | (59) | 336 000    |
|                | rs12526453   | 6   | 12927544                          | PHACTR1                   | Intron                 | C       | G     | 0.65 | 0.113                                 | 1.30E-09 | Yes                 |                    | C                     | MI          | (56) | 25 538     |
|                | rs6909752    | 6   | 22612629                          | LOC105374971-LOC105374972 |                        | A       | G     | 0.33 | 0.050                                 | 2.19E-09 | Yes                 |                    | A                     | CAD         | (59) | 343 171    |
|                | rs3130683    | 6   | 31888367                          | C2                        | Intron                 | T       | C     | 0.86 | 0.077                                 | 2.80E-08 | Yes                 |                    | T                     | CAD         | (59) | 336 000    |
|                | rs4472337    | 6   | 34769765                          | UHRF1BP1                  | Intron                 | T       | C     | 0.16 | 0.058                                 | 2.40E-06 | Yes                 |                    | T                     | CAD         | (59) | 336 000    |
|                | rs1544935    | 6   | 39140125                          | SAYSD1-KCNK5              |                        | T       | G     | 0.81 | 0.077                                 | 2.89E-08 | No                  | rs755852           | A                     | MI          | (58) | 169 427    |
|                | rs56015508   | 6   | 39152041                          | SAYSD1-KCNK5              |                        | C       | A     | 0.79 | 0.058                                 | 1.10E-07 | Yes                 |                    | C                     | CAD         | (59) | 336 000    |
|                | rs2916260    | 6   | 40382711                          | LRFN2                     | Intron                 | T       | C     | NR   | 0.140                                 | 1.80E-06 | Yes                 |                    | T                     | CHD         | (63) | 64 297     |
|                | rs12202017   | 6   | 134196381                         | LINC031312, TARID         | Non coding, Intron     | A       | G     | 0.70 | 0.068                                 | 6.00E-14 | No                  | rs7769954          | A                     | CAD         | (59) | 336 000    |
|                | rs6922269    | 6   | 151252985                         | MTHFD1L                   | Intron                 | A       | G     | 0.30 | 0.207                                 | 6.33E-06 | Yes                 |                    | A                     | CAD         | (64) | 7 383      |

| Risk Group     | Original SNP | Chr | Position of original SNP (GRCh37) | Locus (Gene)              | Functional Consequence | Alleles |       | EAF  | European ancestry values as published |          | Present in ADVANCE? | Best ADVANCE Proxy | ADVANCE Effect Allele | Risk Factor | Ref  | Nb. of Ind |
|----------------|--------------|-----|-----------------------------------|---------------------------|------------------------|---------|-------|------|---------------------------------------|----------|---------------------|--------------------|-----------------------|-------------|------|------------|
|                |              |     |                                   |                           |                        | Effect  | Other |      | $\beta$                               | p-value  |                     |                    |                       |             |      |            |
|                |              |     |                                   |                           |                        |         |       |      |                                       |          |                     |                    |                       |             |      |            |
|                | rs10455872   | 6   | 161103805                         | LPA                       | Intron                 | G       | A     | 0.07 | 0.531                                 | 3.40E-15 | No                  | rs374071816        | A                     | CAD         | (65) | 15 937     |
|                | rs10455872   | 6   | 161103805                         | LPA                       | Intron                 | G       | A     | 0.05 | 0.285                                 | 8.88E-27 | No                  | rs374071816        | A                     | MI          | (58) | 161 728    |
|                | rs2315065    | 6   | 161123451                         | PLG-LPA                   |                        | A       | C     | 0.06 | 0.262                                 | 2.34E-24 | No                  | rs4252185          | C                     | MI          | (58) | 161 728    |
|                | rs6941513    | 6   | 164030800                         | QKI-LOC102724152          |                        | G       | A     | NR   | 0.182                                 | 6.20E-09 | Yes                 |                    | G                     | MI          | (63) | 64 297     |
|                | rs4721377    | 7   | 14855062                          | DGKB                      | Intron                 | T       | C     | NR   | 0.231                                 | 1.90E-06 | Yes                 |                    | T                     | MI          | (63) | 64 297     |
|                | rs12669789   | 7   | 18734065                          | HDAC9                     | Intron                 | C       | T     | NR   | 0.262                                 | 1.73E-06 | Yes                 |                    | C                     | ICA         | (66) | 12 002     |
|                | rs7798197    | 7   | 19037661                          | HDAC9                     | 3'UTR                  | A       | G     | NR   | 0.166                                 | 4.67E-06 | Yes                 |                    | A                     | ICA         | (66) | 12 002     |
|                | rs2107595    | 7   | 19049388                          | HDAC9-TWIST1              |                        | A       | G     | 0.18 | 0.077                                 | 3.40E-13 | Yes                 |                    | A                     | CAD         | (59) | 336 000    |
|                | rs10230207   | 7   | 19611307                          | LOC105375179-LOC105375180 |                        | T       | G     | NR   | 0.191                                 | 9.91E-10 | Yes                 |                    | T                     | ICA         | (66) | 12 002     |
|                | rs112370447  | 7   | 107100794                         | COG5                      | Intron                 | T       | C     | 0.28 | 0.049                                 | 9.60E-07 | No                  | rs987391           | G                     | CAD         | (59) | 336 000    |
|                | rs11556924   | 7   | 129663496                         | ZC3HC1                    | Exon non-syn.          | C       | T     | 0.66 | 0.068                                 | 6.30E-13 | Yes                 |                    | C                     | CAD         | (59) | 336 000    |
|                | rs264        | 8   | 19813180                          | LPL                       | intron                 | G       | A     | NR   | 0.105                                 | 2.92E-07 | Yes                 |                    | G                     | CAD         | (49) | 109 124    |
|                | rs2083636    | 8   | 19865263                          | LPL-LOC105379311          |                        | T       | G     | 0.74 | 0.049                                 | 6.40E-08 | Yes                 |                    | T                     | CAD         | (59) | 336 000    |
|                | rs2001846    | 8   | 126478450                         | TRIB1-LOC105375746        |                        | T       | C     | 0.49 | 0.049                                 | 8.97E-07 | Yes                 |                    | T                     | MI          | (58) | 170 153    |
| Cardiovascular | rs2954029    | 8   | 126481747                         | TRIB1-LOC105375746        |                        | A       | T     | 0.54 | 0.058                                 | 5.20E-13 | No                  | rs2980875          | A                     | CAD         | (59) | 336 000    |
|                | rs6475606    | 9   | 22081850                          | CDKN2B-AS1                | Intron                 | T       | C     | 0.48 | 0.300                                 | 3.59E-08 | No                  | rs1537370          | T                     | ICA         | (67) | 3 166      |
|                | rs1537370    | 9   | 22084310                          | CDKN2B-AS1                | Intron                 | T       | C     | 0.46 | 0.532                                 | 2.35E-11 | Yes                 |                    | C                     | CAC         | (68) | 2 620      |
|                | rs4977574    | 9   | 22124504                          | CDKN2B-AS1                | Intron                 | T       | A     | 0.56 | 0.247                                 | 1.08E-41 | No                  | rs1333047          | T                     | CAD         | (56) | 24 864     |
|                | rs4977574    | 9   | 22124504                          | CDKN2B-AS1                | Intron                 | T       | A     | 0.56 | 0.255                                 | 2.70E-44 | No                  | rs1333047          | T                     | MI          | (56) | 25 538     |
|                | rs1333049    | 9   | 22125503                          | CDKN2B-AS1-DMRTA1         |                        | C       | G     | 0.46 | 0.199                                 | 3.33E-24 | Yes                 |                    | G                     | CAC         | (69) | 15 993     |
|                | rs514659     | 9   | 136144308                         | ABO                       | Intron                 | C       | A     | 0.40 | 0.191                                 | 7.62E-09 | No                  | rs576123           | C                     | CAD         | (70) | 9 427      |
|                | rs514659     | 9   | 136144308                         | ABO                       | Intron                 | C       | A     | 0.37 | 0.191                                 | 7.62E-09 | No                  | rs576123           | C                     | MI          | (70) | 9 427      |
|                | rs532436     | 9   | 136149830                         | ABO                       | Intron                 | A       | G     | 0.19 | 0.113                                 | 2.31E-17 | Yes                 |                    | A                     | MI          | (58) | 169 997    |
|                | rs1887318    | 10  | 30321598                          | KIAA1462                  | Intron                 | T       | C     | 0.43 | 0.058                                 | 4.10E-12 | No                  | rs2505083          | C                     | CAD         | (59) | 336 000    |
|                | rs2505083    | 10  | 30335122                          | KIAA1462                  | Intron                 | C       | T     | 0.39 | 0.058                                 | 6.85E-09 | Yes                 |                    | C                     | MI          | (58) | 169 421    |
|                | rs1870634    | 10  | 44480811                          | LINC00841-CXCL12          |                        | G       | T     | 0.65 | 0.058                                 | 5.50E-13 | Yes                 |                    | G                     | CAD         | (59) | 336 000    |
|                | rs1746048    | 10  | 44775824                          | LINC00841-CXCL12          |                        | C       | T     | 0.84 | 0.131                                 | 8.14E-11 | Yes                 |                    | C                     | CAD         | (56) | 24 864     |
|                | rs1746048    | 10  | 44775824                          | LINC00841-CXCL12          |                        | C       | T     | 0.84 | 0.157                                 | 7.40E-09 | Yes                 |                    | C                     | MI          | (56) | 25 538     |
|                | rs1004467    | 10  | 104594507                         | CYP17A1                   | Intron                 | A       | G     | 0.87 | 0.077                                 | 7.71E-08 | No                  | rs12413409         | G                     | MI          | (58) | 171 875    |
|                | rs12413409   | 10  | 104719096                         | CNNM2                     | intron                 | G       | A     | NR   | 0.077                                 | 1.24E-06 | Yes                 |                    | G                     | CAD         | (49) | 109 124    |
|                | rs10840293   | 11  | 9751196                           | SWAP70                    | Intron                 | A       | G     | 0.55 | 0.049                                 | 6.90E-09 | Yes                 |                    | A                     | CAD         | (59) | 336 000    |
|                | rs3993105    | 11  | 13300252                          | ARNTL                     | Intron                 | T       | C     | 0.68 | 0.047                                 | 4.77E-08 | No                  | rs7928655          | G                     | CAD         | (59) | 340 699    |
|                | rs2019090    | 11  | 103668962                         | LOC105369463-LOC102723862 |                        | A       | T     | 0.36 | 0.068                                 | 3.60E-09 | Yes                 |                    | A                     | MI          | (58) | 166 655    |
|                | rs2839812    | 11  | 103673294                         | LOC105369463-LOC102723862 |                        | T       | A     | 0.31 | 0.058                                 | 2.00E-11 | No                  | rs2019090          | A                     | CAD         | (59) | 336 000    |
|                | rs12280753   | 11  | 116613660                         | LOC101929011-BUD13        |                        | C       | T     | 0.95 | 0.371                                 |          | Yes                 |                    | C                     | CAD         | (59) | 336 000    |

Electronic Supplementary Material J. Tremblay et al.

| Risk Group     | Original SNP | Chr | Position of original SNP (GRCh37) | Locus (Gene)             | Functional Consequence | Alleles |       | EAF  | European ancestry values as published |          | Present in ADVANCE? | Best ADVANCE Proxy | ADVANCE Effect Allele | Risk Factor | Ref  | Nb. of Ind |
|----------------|--------------|-----|-----------------------------------|--------------------------|------------------------|---------|-------|------|---------------------------------------|----------|---------------------|--------------------|-----------------------|-------------|------|------------|
|                |              |     |                                   |                          |                        | Effect  | Other |      | $\beta$                               | p-value  |                     |                    |                       |             |      |            |
|                |              |     |                                   |                          |                        |         |       |      |                                       |          |                     |                    |                       |             |      |            |
|                | rs964184     | 11  | 116648917                         | ZPR1 (near APOA5, BUD13) | 3'UTR                  | G       | C     | 0.16 | 0.049                                 | 4.70E-06 | Yes                 |                    | G                     | CAD         | (59) | 336 000    |
|                | rs7121446    | 11  | 121954657                         | MIR100HG                 | Intron                 | A       | G     | 0.24 | 1.897                                 |          | Yes                 |                    | A                     | CAD         | (59) | 336 000    |
|                | rs2229357    | 12  | 57738600                          | INHBC                    | Exon non-syn.          | G       | A     | 0.76 | 0.049                                 | 3.40E-06 | No                  | rs79395356         | T                     | CAD         | (59) | 336 000    |
|                | rs2681472    | 12  | 90008959                          | ATP2B1                   | Intron                 | G       | A     | 0.19 | 0.068                                 | 7.60E-11 | Yes                 |                    | G                     | CAD         | (59) | 336 000    |
|                | rs3184504    | 12  | 111865049                         | SH2B3                    | Exon non-syn.          | T       | C     | NR   | 0.068                                 | 9.33E-07 | No                  | rs7310615          | C                     | CAD         | (49) | 109 124    |
|                | rs3184504    | 12  | 111865049                         | SH2B3                    | Exon non-syn.          | T       | C     | NR   | 0.068                                 | 9.33E-07 | No                  | rs7310615          | C                     | MI          | (49) | 109 124    |
|                | rs653178     | 12  | 112007756                         | ATXN2                    | Intron                 | C       | T     | 0.44 | 0.077                                 | 2.80E-11 | No                  | rs7310615          | C                     | MI          | (58) | 167 530    |
|                | rs2244608    | 12  | 121416988                         | HFN1A                    | Intron                 | G       | A     | 0.35 | 0.052                                 | 7.74E-10 | Yes                 |                    | G                     | CAD         | (59) | 345 106    |
|                | rs11057830   | 12  | 125307053                         | SCARB1                   | Intron                 | A       | G     | 0.15 | 0.068                                 | 4.20E-09 | Yes                 |                    | A                     | CAD         | (59) | 336 000    |
|                | rs16945184   | 13  | 91755199                          | LINC00380-LOC105370312   |                        | C       | T     | NR   | 0.186                                 | 5.80E-06 | Yes                 |                    | C                     | CHD         | (63) | 64 297     |
| Cardiovascular | rs11617955   | 13  | 110818102                         | COL4A1                   | Intron                 | T       | A     | 0.89 | 0.086                                 | 4.10E-10 | Yes                 |                    | T                     | CAD         | (59) | 336 000    |
|                | rs55940034   | 13  | 111043309                         | COL4A2                   | Intron                 | G       | A     | 0.27 | 0.068                                 | 7.62E-08 | Yes                 |                    | G                     | MI          | (58) | 166 228    |
|                | rs1924981    | 13  | 290226415                         | FLT1                     | Intron                 | T       | C     | 0.33 | 0.049                                 | 1.90E-07 | Yes                 |                    | T                     | CAD         | (59) | 336 000    |
|                | rs10139550   | 14  | 100145710                         | HHLPL1                   | 3'UTR                  | G       | C     | 0.42 | 0.049                                 | 1.80E-09 | Yes                 |                    | G                     | CAD         | (59) | 336 000    |
|                | rs72743461   | 15  | 67441750                          | SMAD3                    | Intron                 | C       | A     | 0.78 | 0.068                                 | 4.80E-12 | Yes                 |                    | C                     | CAD         | (59) | 336 000    |
|                | rs1994016    | 15  | 79080234                          | ADAMTS7                  | Intron                 | C       | T     | 0.61 | 0.199                                 | 2.41E-12 | Yes                 |                    | C                     | CAD         | (70) | 19 776     |
|                | rs3825807    | 15  | 79089111                          | ADAMTS7                  | Exon non-syn.          | T       | C     | 0.57 | 1.013                                 | 6.50E-06 | No                  | rs1994016          | C                     | CAC         | (68) | 2 620      |
|                | rs7164479    | 15  | 79123054                          | ADAMTS7-MORF4L1          |                        | C       | T     | 0.58 | 0.068                                 | 6.40E-18 | No                  | rs7165042          | C                     | CAD         | (59) | 336 000    |
|                | rs7165042    | 15  | 79123338                          | ADAMTS7-MORF4L1          |                        | C       | T     | 0.56 | 0.058                                 | 3.02E-09 | Yes                 |                    | C                     | MI          | (58) | 169 997    |
|                | rs2083460    | 15  | 89574484                          | MFGE8-ABHD2              |                        | T       | C     | 0.89 | 0.068                                 | 1.40E-07 | Yes                 |                    | T                     | CAD         | (59) | 336 000    |
|                | rs247616     | 16  | 56989590                          | HERPUD1-CETP             |                        | C       | T     | 0.68 | 0.039                                 | 1.00E-06 | Yes                 |                    | C                     | CAD         | (59) | 336 000    |
|                | rs2106261    | 16  | 73068678                          | ZFH3                     | Intron                 | T       | C     | 0.22 | 0.223                                 | 2.30E-07 | No                  | rs879324           | A                     | AF          | (62) | 40 518     |
|                | rs7500448    | 16  | 83045790                          | CDH13                    | Intron                 | A       | G     | 0.77 | 0.061                                 | 4.76E-10 | Yes                 |                    | A                     | CAD         | (59) | 337 399    |
|                | rs4843416    | 16  | 86676764                          | FOXL1-LOC102724344       |                        | G       | A     | NR   | 0.357                                 | 6.50E-06 | No                  | rs16941789         | C                     | MI          | (63) | 64 297     |
|                | rs113348108  | 17  | 2088849                           | SMG6                     | Intron                 | Del     | CAG A | 0.31 | 0.049                                 | 5.80E-08 | No                  | rs4790883          | C                     | CAD         | (59) | 336 000    |
|                | rs9914266    | 17  | 2117945                           | SMG6                     | Intron                 | G       | A     | 0.35 | 0.049                                 | 2.55E-06 | No                  | rs2281727          | G                     | MI          | (58) | 171 874    |
|                | rs9897596    | 17  | 17593453                          | RAI1                     | Intron                 | T       | C     | 0.52 | 0.039                                 | 3.10E-06 | Yes                 |                    | T                     | CAD         | (59) | 336 000    |
|                | rs35895680   | 17  | 47060322                          | GIP-IGF2BP1              |                        | C       | A     | 0.72 | 0.058                                 | 7.77E-06 | Yes                 |                    | C                     | MI          | (58) | 170 347    |
|                | rs4643373    | 17  | 47123423                          | IGF2BP1                  | Intron                 | T       | C     | 0.72 | 0.049                                 | 1.20E-06 | Yes                 |                    | T                     | CAD         | (59) | 336 000    |
|                | rs7212798    | 17  | 59013488                          | BCAS3                    | Intron                 | C       | T     | 0.15 | 0.068                                 | 8.06E-06 | Yes                 |                    | C                     | MI          | (58) | 171 873    |
|                | rs8068952    | 17  | 59286644                          | BCAS3                    | Intron                 | G       | C     | 0.23 | 0.068                                 | 1.40E-09 | Yes                 |                    | G                     | CAD         | (59) | 336 000    |
|                | rs1122608    | 19  | 11179709                          | SMARCA4                  | Intron                 | G       | T     | 0.75 | 0.140                                 | 1.90E-09 | No                  | rs73013202         | C                     | MI          | (56) | 25 538     |
|                | rs8108632    | 19  | 41854534                          | TGFB1                    | Intron                 | T       | A     | 0.48 | 0.047                                 | 4.04E-08 | Yes                 |                    | T                     | CAD         | (59) | 345 058    |
|                | rs56131196   | 19  | 45422946                          | APOC1                    | Downstr.500B           | A       | G     | 0.16 | 0.086                                 | 3.87E-08 | No                  | rs4420638          | G                     | MI          | (58) | 163 760    |
|                | rs28451064   | 21  | 35593827                          | LINC00310-LOC105372791   |                        | A       | G     | 0.12 | 0.131                                 | 2.60E-23 | No                  | rs9982601          | T                     | CAD         | (59) | 336 000    |
|                | rs9982601    | 21  | 35599128                          | MRPS6-KCNE2              |                        | T       | C     | 0.13 | 0.182                                 | 6.40E-11 | Yes                 |                    | T                     | MI          | (56) | 25 538     |

Electronic Supplementary Material J. Tremblay et al.

| Risk Group       | Original SNP | Chr      | Position of original SNP (GRCh37) | Locus (Gene)               | Functional Consequence | Alleles |       | EAF   | European ancestry values as published |          | Present in ADVANCE? | Best ADVANCE Proxy | ADVANCE Effect Allele | Risk Factor  | Ref     | Nb. of Ind |
|------------------|--------------|----------|-----------------------------------|----------------------------|------------------------|---------|-------|-------|---------------------------------------|----------|---------------------|--------------------|-----------------------|--------------|---------|------------|
|                  |              |          |                                   |                            |                        | Effect  | Other |       | $\beta$                               | p-value  |                     |                    |                       |              |         |            |
| Low Birth Weight | rs2473248    | 1        | 22546110                          | WNT4-ZBTB40                |                        | C       | T     | 0.87  | 0.033                                 | 1.10E-08 | No                  | rs2744729          | T                     | Birth Weight | (71)    | 139 428    |
|                  | rs4330912    | 1        | 155964698                         | LOC107985208, LOC107985210 | Intron                 | G       | C     | 0.64  | 0.021                                 | 1.80E-07 | No                  | rs12043212         | A                     | Birth Weight | (71)    | 143 677    |
|                  | rs72480273   | 1        | 161646824                         | FCGR2B                     | Intron                 | C       | A     | 0.17  | 0.031                                 | 8.00E-10 | No                  | rs12118043         | C                     | Birth Weight | (71)    | 138 380    |
|                  | rs61830764   | 1        | 212289976                         | DTL-PPP2R5A                |                        | A       | G     | 0.38  | 0.022                                 | 5.60E-08 | Yes                 |                    | G                     | Birth Weight | (71)    | 138 158    |
| Low Birth Weight | rs7575873    | 2        | 23902360                          | ATAD2B                     | Intron                 | A       | G     | 0.88  | 0.038                                 | 1.30E-11 | No                  | rs7578606          | C                     | Birth Weight | (71)    | 139 425    |
|                  | rs1374204    | 2        | 46484205                          | LOC101926974               | Intron                 | T       | C     | 0.70  | 0.047                                 | 6.20E-29 | Yes                 |                    | C                     | Birth Weight | (71)    | 134 453    |
|                  | rs2168443    | 3        | 46947087                          | PTH1R-CCDC12               |                        | T       | A     | 0.38  | 0.023                                 | 3.50E-09 | Yes                 |                    | A                     | Birth Weight | (71)    | 143 670    |
|                  | rs11719201   | 3        | 123069058                         | ADCY5                      | Intron                 | T       | C     | 0.23  | 0.046                                 | 2.40E-26 | No                  | rs11720108         | C                     | Birth Weight | (71)    | 143 670    |
|                  | rs10935733   | 3        | 148622968                         | CPA3-GYG1                  |                        | T       | C     | 0.41  | 0.022                                 | 9.20E-09 | Yes                 |                    | C                     | Birth Weight | (71)    | 139 426    |
|                  | rs900399     | 3        | 156798732                         | LEKR1-LINC00880            |                        | A       | G     | 0.61  | 0.052                                 | 2.20E-41 | Yes                 |                    | G                     | Birth Weight | (71)    | 139 426    |
|                  | rs2724475    | 4        | 17946432                          | LCORL                      | Intron                 | T       | C     | 0.27  | 0.034                                 | 5.30E-16 | Yes                 |                    | C                     | Birth Weight | (71)    | 139 426    |
|                  | rs2131354    | 4        | 145599908                         | HHIP                       | Intron                 | A       | G     | 0.53  | 0.026                                 | 4.10E-12 | Yes                 |                    | G                     | Birth Weight | (71)    | 139 431    |
|                  | rs4432842    | 5        | 57172078                          | LOC101928505-LOC101928539  |                        | T       | C     | 0.70  | 0.021                                 | 3.40E-07 | Yes                 |                    | C                     | Birth Weight | (71)    | 139 429    |
|                  | rs2946179    | 5        | 157886627                         | LOC101927697-EBF1          |                        | C       | T     | 0.73  | 0.024                                 | 1.30E-08 | Yes                 |                    | T                     | Birth Weight | (71)    | 143 669    |
|                  | rs35261542   | 6        | 20675792                          | CDKAL1                     | Intron                 | C       | A     | 0.73  | 0.044                                 | 4.40E-27 | Yes                 |                    | A                     | Birth Weight | (71)    | 143 667    |
|                  | rs9379832    | 6        | 26186200                          | HIST1H2BE-HIST1H4D         |                        | A       | G     | 0.70  | 0.023                                 | 6.60E-08 | Yes                 |                    | G                     | Birth Weight | (71)    | 138 161    |
|                  | rs9368777    | 6        | 33788637                          | LOC105375025               | Intron                 | C       | G     | 0.58  | 0.022                                 | 2.20E-08 | Yes                 |                    | G                     | Birth Weight | (71)    | 143 677    |
|                  | rs1187118    | 6        | 34169020                          | GRM4-HMGA1                 |                        | A       | T     | 0.17  | 0.030                                 | 3.60E-09 | Yes                 |                    | T                     | Birth Weight | (71)    | 137 045    |
|                  | rs1415701    | 6        | 130345835                         | L3MBTL3                    | Intron                 | G       | A     | 0.74  | 0.025                                 | 2.60E-09 | Yes                 |                    | A                     | Birth Weight | (71)    | 143 666    |
|                  | rs10872678   | 6        | 152039964                         | ESR1                       | Intron                 | T       | C     | 0.72  | 0.038                                 | 6.90E-20 | Yes                 |                    | C                     | Birth Weight | (71)    | 139 427    |
|                  | rs798489     | 7        | 2801803                           | GNA12, AMZ1                | Intron, Intron         | C       | T     | 0.73  | 0.023                                 | 2.00E-08 | Yes                 |                    | T                     | Birth Weight | (71)    | 143 670    |
|                  | rs11765649   | 7        | 23479013                          | IGF2BP3                    | Intron                 | T       | C     | 0.75  | 0.027                                 | 5.80E-10 | Yes                 |                    | C                     | Birth Weight | (71)    | 139 428    |
| rs6959887        | 7            | 35295365 | TBX20                             | Upstream 2KB               | A                      | G       | 0.61  | 0.023 | 1.50E-09                              | Yes      |                     | G                  | Birth Weight          | (71)         | 143 659 |            |

Electronic Supplementary Material J. Tremblay et al.

| Risk Group       | Original SNP | Chr | Position of original SNP (GRCh37) | Locus (Gene)           | Functional Consequence | Alleles |            | EAF  | European ancestry values as published |          | Present in ADVANCE? | Best ADVANCE Proxy | ADVANCE Effect Allele | Risk Factor  | Ref  | Nb. of Ind |
|------------------|--------------|-----|-----------------------------------|------------------------|------------------------|---------|------------|------|---------------------------------------|----------|---------------------|--------------------|-----------------------|--------------|------|------------|
|                  |              |     |                                   |                        |                        | Effect  | Other      |      | $\beta$                               | p-value  |                     |                    |                       |              |      |            |
|                  |              |     |                                   |                        |                        |         | rs62466330 |      | 7                                     | 73056805 |                     |                    |                       |              |      |            |
| Low Birth Weight | rs13266210   | 8   | 41533514                          | ANK1                   | Intron                 | A       | G          | 0.79 | 0.031                                 | 1.30E-11 | Yes                 |                    | G                     | Birth Weight | (71) | 139 429    |
|                  | rs6989280    | 8   | 126504726                         | TRIB1-LOC105375746     |                        | G       | A          | 0.73 | 0.022                                 | 2.20E-07 | No                  | rs6987702          | C                     | Birth Weight | (71) | 143 671    |
|                  | rs12543725   | 8   | 142247979                         | SLC45A4                | 5'UTR                  | G       | A          | 0.59 | 0.023                                 | 1.20E-09 | Yes                 |                    | A                     | Birth Weight | (71) | 139 431    |
|                  | rs12551019   | 9   | 96949079                          | MIRLET7DHG             | Intron                 | C       | T          | 0.68 | 0.022                                 | 3.10E-08 | Yes                 |                    | T                     | Birth Weight | (71) | 143 677    |
|                  | rs3780573    | 9   | 98239503                          | PTCH1                  | Intron                 | A       | G          | 0.10 | 0.055                                 | 7.00E-18 | Yes                 |                    | G                     | Birth Weight | (71) | 134 746    |
|                  | rs1411424    | 9   | 113892963                         | LOC105376219           | Intron                 | A       | G          | 0.52 | 0.021                                 | 2.20E-08 | Yes                 |                    | G                     | Birth Weight | (71) | 139 424    |
|                  | rs4836833    | 9   | 123633948                         | PHF19                  | Intron                 | C       | G          | 0.67 | 0.023                                 | 8.60E-09 | No                  | rs3933326          | A                     | Birth Weight | (71) | 139 424    |
|                  | rs10818797   | 9   | 126020405                         | STRBP                  | Intron                 | C       | T          | 0.14 | 0.035                                 | 1.20E-10 | Yes                 |                    | T                     | Birth Weight | (71) | 139 427    |
|                  | rs2497304    | 10  | 94492716                          | HHEX-EXOC6             |                        | C       | T          | 0.52 | 0.028                                 | 2.60E-14 | Yes                 |                    | T                     | Birth Weight | (71) | 143 670    |
|                  | rs79237883   | 10  | 104719096                         | NT5C2                  | 5'UTR                  | C       | T          | 0.08 | 0.037                                 | 3.60E-08 | No                  | rs12413409         | G                     | Birth Weight | (71) | 143 667    |
|                  | rs740746     | 10  | 115798895                         | LOC105378493-ADRB1     |                        | A       | G          | 0.73 | 0.036                                 | 3.80E-18 | No                  | rs2773469          | A                     | Birth Weight | (71) | 143 671    |
|                  | rs2421016    | 10  | 124167512                         | PLEKHA1                | Intron                 | T       | C          | 0.49 | 0.021                                 | 1.80E-08 | Yes                 |                    | C                     | Birth Weight | (71) | 143 659    |
|                  | rs10830963   | 11  | 92708710                          | MTNR1B                 | Intron                 | G       | C          | 0.28 | 0.023                                 | 2.90E-08 | Yes                 |                    | C                     | Birth Weight | (71) | 143 663    |
|                  | rs11055034   | 12  | 12889125                          | APOLD1                 | Intron                 | C       | A          | 0.73 | 0.022                                 | 1.80E-07 | No                  | rs79375472         | C                     | Birth Weight | (71) | 143 653    |
|                  | rs2306547    | 12  | 26877885                          | ITPR2                  | Intron                 | C       | T          | 0.54 | 0.021                                 | 1.80E-08 | Yes                 |                    | T                     | Birth Weight | (71) | 139 431    |
|                  | rs1351394    | 12  | 65958046                          | HMGA2                  | Intron                 | T       | C          | 0.49 | 0.044                                 | 1.90E-32 | No                  | rs7312464          | G                     | Birth Weight | (71) | 143 671    |
|                  | rs7964361    | 12  | 102994878                         | LOC105369944           | Intron                 | A       | G          | 0.09 | 0.039                                 | 4.70E-09 | Yes                 |                    | G                     | Birth Weight | (71) | 139 428    |
|                  | rs7998537    | 13  | 40666754                          | LOC107984569-LINC00332 |                        | G       | A          | 0.68 | 0.022                                 | 3.90E-08 | No                  | rs7328783          | G                     | Birth Weight | (71) | 139 425    |
|                  | rs34217484   | 13  | 48854550                          | ITM2B-LINC00441        |                        | A       | T          | 0.26 | 0.024                                 | 4.80E-08 | Yes                 |                    | T                     | Birth Weight | (71) | 137 561    |
|                  | rs1819436    | 13  | 78580283                          | LINC01069-LINC00446    |                        | C       | T          | 0.87 | 0.033                                 | 6.30E-09 | Yes                 |                    | T                     | Birth Weight | (71) | 138 979    |
| Low Birth Weight | rs7402982    | 15  | 99193269                          | IGF1R                  | Intron                 | A       | G          | 0.43 | 0.023                                 | 2.30E-09 | Yes                 |                    | G                     | Birth Weight | (71) | 139 423    |
|                  | rs1011939    | 16  | 19992996                          | LOC105371117           | Intron                 | G       | A          | 0.30 | 0.022                                 | 1.30E-07 | Yes                 |                    | A                     | Birth Weight | (71) | 143 604    |

Electronic Supplementary Material J. Tremblay et al.

| Risk Group | Original SNP | Chr      | Position of original SNP (GRCh37) | Locus (Gene)       | Functional Consequence | Alleles     |       | EAF   | European ancestry values as published |              | Present in ADVANCE? | Best ADVANCE Proxy | ADVANCE Effect Allele | Risk Factor | Ref     | Nb. of Ind |
|------------|--------------|----------|-----------------------------------|--------------------|------------------------|-------------|-------|-------|---------------------------------------|--------------|---------------------|--------------------|-----------------------|-------------|---------|------------|
|            |              |          |                                   |                    |                        | Effect      | Other |       | $\beta$                               | p-value      |                     |                    |                       |             |         |            |
|            |              |          |                                   |                    |                        | rs113086489 | 17    |       | 7171356                               | CLDN7-SLC2A4 |                     |                    |                       |             |         |            |
| rs72833480 | 17           | 45964861 | SP6-LOC102724532                  |                    | A                      | G           | 0.29  | 0.023 | 4.60E-08                              | Yes          |                     | G                  | Birth Weight          | (71)        | 139 421 |            |
| rs10402712 | 19           | 33926013 | PEPD                              | Intron             | A                      | G           | 0.26  | 0.022 | 4.40E-07                              | Yes          |                     | G                  | Birth Weight          | (71)        | 139 428 |            |
| rs6040076  | 20           | 10658882 | JAG1-LOC101929395                 |                    | C                      | G           | 0.49  | 0.023 | 2.00E-09                              | Yes          |                     | G                  | Birth Weight          | (71)        | 139 424 |            |
| rs28530618 | 20           | 31248692 | C20orf203-COMMD7                  |                    | A                      | G           | 0.49  | 0.026 | 7.70E-12                              | No           | rs11475789          | A                  | Birth Weight          | (71)        | 138 162 |            |
| rs6016377  | 20           | 39172728 | LOC107985446-LOC102724968         |                    | T                      | C           | 0.43  | 0.024 | 9.50E-10                              | Yes          |                     | C                  | Birth Weight          | (71)        | 139 425 |            |
| rs2229742  | 21           | 16353809 | NRIP1                             | Exon non-syn.      | G                      | C           | 0.87  | 0.036 | 2.20E-09                              | No           | rs17274750          | A                  | Birth Weight          | (71)        | 143 672 |            |
| rs134594   | 22           | 29468456 | C22orf31, KREMEN1                 | Intron, Upstr. 2KB | C                      | T           | 0.35  | 0.023 | 1.00E-08                              | Yes          |                     | T                  | Birth Weight          | (71)        | 137 340 |            |

ESM Table 4: Effect of adding treatment assignment as a covariate on the performance of the multiPRS model.

| Outcomes                                         | AUCs of multiPRS model<br>(95% CI) |                              |
|--------------------------------------------------|------------------------------------|------------------------------|
|                                                  | No Treatment<br>Assignment         | With Treatment<br>Assignment |
| <b>Macroalbuminuria</b>                          | <b>0.65</b><br>(0.60-0.69)         | <b>0.66</b><br>(0.61-0.70)   |
| <b>Low eGFR</b>                                  | <b>0.64</b><br>(0.62-0.66)         | <b>0.65</b><br>(0.63-0.67)   |
| <b>New or worsening nephropathy</b>              | <b>0.64</b><br>(0.60-0.68)         | <b>0.64</b><br>(0.60-0.68)   |
| <b>Major microvascular</b>                       | <b>0.67</b><br>(0.64-0.70)         | <b>0.67</b><br>(0.64-0.70)   |
| <b>Major macrovascular</b>                       | <b>0.68</b><br>(0.66-0.70)         | <b>0.68</b><br>(0.66-0.71)   |
| <b>Combined major micro or<br/>macrovascular</b> | <b>0.67</b><br>(0.65-0.70)         | <b>0.67</b><br>(0.65-0.70)   |
| <b>Stroke</b>                                    | <b>0.66</b><br>(0.62-0.71)         | <b>0.67</b><br>(0.62-0.71)   |
| <b>Myocardial infarction</b>                     | <b>0.67</b><br>(0.63-0.70)         | <b>0.67</b><br>(0.63-0.71)   |
| <b>Heart failure</b>                             | <b>0.68</b><br>(0.65-0.72)         | <b>0.69</b><br>(0.65-0.72)   |
| <b>Cardiovascular death</b>                      | <b>0.72</b><br>(0.69-0.75)         | <b>0.73</b><br>(0.69-0.76)   |
| <b>All cause death</b>                           | <b>0.69</b><br>(0.67-0.72)         | <b>0.69</b><br>(0.67-0.72)   |

ESM Table 5: Effect of individual wPRS, combined 10wPRS and 10wPRS + PC1 on prevalent and incident cases determined by single wPRS.

|                  | AUC<br>95% CI      |                    |                    |                    |                    |                    |                    |                    |                    |                    |                           |                           |
|------------------|--------------------|--------------------|--------------------|--------------------|--------------------|--------------------|--------------------|--------------------|--------------------|--------------------|---------------------------|---------------------------|
|                  | PRS_1              | PRS_2              | PRS_3              | PRS_4              | PRS_5              | PRS_6              | PRS_7              | PRS_8              | PRS_9              | PRS_10             | 10 PRS                    | 10 PRS+<br>PC1            |
| <b>Prevalent</b> |                    |                    |                    |                    |                    |                    |                    |                    |                    |                    |                           |                           |
| Low eGFR         | 0.51<br>0.49, 0.53 | 0.50<br>0.48, 0.52 | 0.51<br>0.49, 0.53 | 0.51<br>0.49, 0.53 | 0.50<br>0.48, 0.53 | 0.51<br>0.49, 0.53 | 0.54<br>0.52, 0.56 | 0.51<br>0.49, 0.53 | 0.51<br>0.49, 0.53 | 0.51<br>0.49, 0.53 | 0.55<br>0.53, 0.57        | <b>0.56</b><br>0.53, 0.58 |
| Stroke           | 0.53<br>0.50, 0.56 | 0.53<br>0.50, 0.56 | 0.53<br>0.50, 0.56 | 0.50<br>0.47, 0.53 | 0.53<br>0.50, 0.56 | 0.51<br>0.48, 0.54 | 0.54<br>0.50, 0.57 | 0.52<br>0.49, 0.56 | 0.50<br>0.47, 0.53 | 0.52<br>0.49, 0.55 | 0.58<br>0.54, 0.61        | <b>0.59</b><br>0.56, 0.62 |
| MI               | 0.51<br>0.49, 0.52 | 0.50<br>0.48, 0.52 | 0.52<br>0.50, 0.54 | 0.53<br>0.51, 0.55 | 0.51<br>0.49, 0.53 | 0.51<br>0.49, 0.53 | 0.49<br>0.48, 0.51 | 0.51<br>0.49, 0.53 | 0.51<br>0.49, 0.53 | 0.53<br>0.51, 0.55 | <b>0.55</b><br>0.53, 0.57 | <b>0.55</b><br>0.53, 0.57 |
| HF               | 0.53<br>0.48, 0.57 | 0.54<br>0.50, 0.59 | 0.50<br>0.46, 0.54 | 0.52<br>0.48, 0.57 | 0.50<br>0.46, 0.55 | 0.48<br>0.44, 0.53 | 0.51<br>0.46, 0.55 | 0.55<br>0.51, 0.59 | 0.55<br>0.51, 0.59 | 0.55<br>0.50, 0.59 | 0.61<br>0.57, 0.65        | <b>0.70</b><br>0.66, 0.74 |
| Macroalb         | 0.56<br>0.52, 0.60 | 0.52<br>0.47, 0.56 | 0.55<br>0.50, 0.59 | 0.52<br>0.48, 0.57 | 0.51<br>0.47, 0.56 | 0.52<br>0.48, 0.56 | 0.50<br>0.46, 0.55 | 0.53<br>0.48, 0.57 | 0.56<br>0.52, 0.60 | 0.52<br>0.48, 0.56 | <b>0.60</b><br>0.56, 0.64 | <b>0.60</b><br>0.56, 0.64 |
| <b>Incident</b>  |                    |                    |                    |                    |                    |                    |                    |                    |                    |                    |                           |                           |
| Low eGFR         | 0.51<br>0.49, 0.53 | 0.50<br>0.48, 0.53 | 0.51<br>0.49, 0.53 | 0.50<br>0.48, 0.52 | 0.51<br>0.49, 0.54 | 0.50<br>0.48, 0.52 | 0.50<br>0.48, 0.52 | 0.50<br>0.48, 0.52 | 0.52<br>0.50, 0.54 | 0.52<br>0.50, 0.54 | <b>0.54</b><br>0.52, 0.56 | <b>0.54</b><br>0.52, 0.56 |
| Stroke           | 0.52<br>0.47, 0.57 | 0.50<br>0.45, 0.55 | 0.50<br>0.45, 0.55 | 0.50<br>0.46, 0.55 | 0.56<br>0.51, 0.60 | 0.50<br>0.45, 0.55 | 0.52<br>0.47, 0.57 | 0.55<br>0.50, 0.60 | 0.53<br>0.48, 0.57 | 0.50<br>0.46, 0.55 | 0.57<br>0.52, 0.62        | <b>0.61</b><br>0.57, 0.66 |
| MI               | 0.51<br>0.47, 0.56 | 0.54<br>0.50, 0.59 | 0.53<br>0.49, 0.57 | 0.52<br>0.48, 0.56 | 0.54<br>0.50, 0.58 | 0.51<br>0.47, 0.55 | 0.51<br>0.47, 0.55 | 0.52<br>0.48, 0.56 | 0.53<br>0.49, 0.58 | 0.51<br>0.47, 0.56 | 0.58<br>0.54, 0.63        | <b>0.60</b><br>0.56, 0.64 |
| HF               | 0.52<br>0.49, 0.56 | 0.52<br>0.48, 0.56 | 0.51<br>0.47, 0.55 | 0.53<br>0.49, 0.57 | 0.55<br>0.51, 0.59 | 0.52<br>0.48, 0.55 | 0.51<br>0.47, 0.55 | 0.51<br>0.48, 0.55 | 0.50<br>0.47, 0.54 | 0.50<br>0.47, 0.54 | 0.57<br>0.53, 0.61        | <b>0.57</b><br>0.53, 0.61 |
| Macroalb         | 0.53<br>0.48, 0.57 | 0.56<br>0.51, 0.61 | 0.53<br>0.48, 0.57 | 0.54<br>0.49, 0.60 | 0.51<br>0.46, 0.55 | 0.54<br>0.50, 0.59 | 0.50<br>0.45, 0.55 | 0.49<br>0.44, 0.53 | 0.51<br>0.46, 0.56 | 0.53<br>0.48, 0.57 | <b>0.60</b><br>0.56, 0.65 | <b>0.60</b><br>0.56, 0.65 |

PRS\_1 : PRS\_Albuminuria

PRS\_2 : PRS\_Biomarkers

PRS\_3 : PRS\_Blood pressure

PRS\_4 : PRS\_Cardiovascular

PRS\_5 : PRS\_Stroke

PRS\_6 : PRS\_Diabetes

PRS\_7 : PRS\_Glomerular filtration rate

PRS\_8 : PRS\_Lipids

PRS\_9 : PRS\_Obesity

PRS\_10 : PRS\_Birth weight

PC1: principal component 1; MI: Myocardial infarction; HF: Heart failure; Macroalb: Macroalbuminuria.

The highest AUCs are shown in bold.



**ESM Table 6: AUC with confidence intervals for multiPRS model compared to ADVANCE and Framingham clinical scores.**

| Outcomes              | MultiPRS<br>AUC<br>(95% CI) | Clinical scores            |                         |                            |                         |
|-----------------------|-----------------------------|----------------------------|-------------------------|----------------------------|-------------------------|
|                       |                             | ADVANCE                    |                         | Framingham                 |                         |
|                       |                             | AUC<br>(95% CI)            | p-values<br>vs multiPRS | AUC<br>(95% CI)            | p-values<br>vs multiPRS |
| Major macrovascular   | <b>0.67</b><br>(0.64–0.69)  | <b>0.72</b><br>(0.69–0.74) | 0.026                   | <b>0.65</b><br>(0.62–0.67) | 0.072                   |
| Stroke                | <b>0.62</b><br>(0.58–0.67)  | <b>0.68</b><br>(0.64–0.73) | 0.509                   | <b>0.61</b><br>(0.57–0.66) | 0.134                   |
| Myocardial infarction | <b>0.64</b><br>(0.61–0.68)  | <b>0.64</b><br>(0.60–0.68) | 0.373                   | <b>0.65</b><br>(0.61–0.69) | 0.606                   |
| Heart failure         | <b>0.66</b><br>(0.62–0.69)  | <b>0.73</b><br>(0.70–0.77) | 0.06                    | <b>0.61</b><br>(0.57–0.64) | 0.005                   |
| Cardiovascular death  | <b>0.71</b><br>(0.68–0.74)  | <b>0.76</b><br>(0.72–0.79) | 0.136                   | <b>0.65</b><br>(0.62–0.68) | 0.002                   |
| All cause death       | <b>0.68</b><br>(0.66–0.71)  | <b>0.70</b><br>(0.67–0.73) | 0.613                   | <b>0.64</b><br>(0.62–0.67) | 0.005                   |

C-statistics of different outcomes using multiPRS compared to clinical models (ADVANCE and Framingham clinical risk scores). 10-fold cross-validated AUCs and percentile-based confidence intervals (CI) were estimated from ROC curves and calculated from the predicted risks derived from the regression models. The multiPRS model is composed of the 10 wPRS, PC1, sex, age at diagnosis of T2D, and diabetes duration. The controls used did not have a specific outcome at any time during the study. The ADVANCE and Framingham clinical scores were calculated as described in the literature and tested for association with ADVANCE phenotypes using linear regression. **Abbreviation: CI:** Confidence intervals. P values are for differences between AUC of multiPRS and each of the clinical score.

**ESM Table 7: Continuous net reclassification index adding the multiPRS to Framingham & ADVANCE clinical risk scores.**

| Outcomes              | Reclassified predicted risk with multiPRS (%) |                                     |                  |                                     |
|-----------------------|-----------------------------------------------|-------------------------------------|------------------|-------------------------------------|
|                       | Framingham                                    |                                     | ADVANCE          |                                     |
|                       | Net reclassified                              | Reclassified<br>Decreased/Increased | Net reclassified | Reclassified<br>Decreased/Increased |
| Major macrovascular   | 36                                            | 30/51                               | 24               | 16/37                               |
| Stroke                | 39                                            | 29/63                               | 33               | 24/61                               |
| Myocardial infarction | 45                                            | 30/62                               | 41               | 30/63                               |
| Cardiovascular death  | 62                                            | 48/73                               | 26               | 19/48                               |
| All cause death       | 49                                            | 37/57                               | 24               | 17/37                               |

Reclassification of predicted risk (%) with the addition of multiPRS to Framingham and ADVANCE scores for macrovascular outcomes of T2D. Bootstrapping was performed with 1000 iterations.

## Supplementary Figures

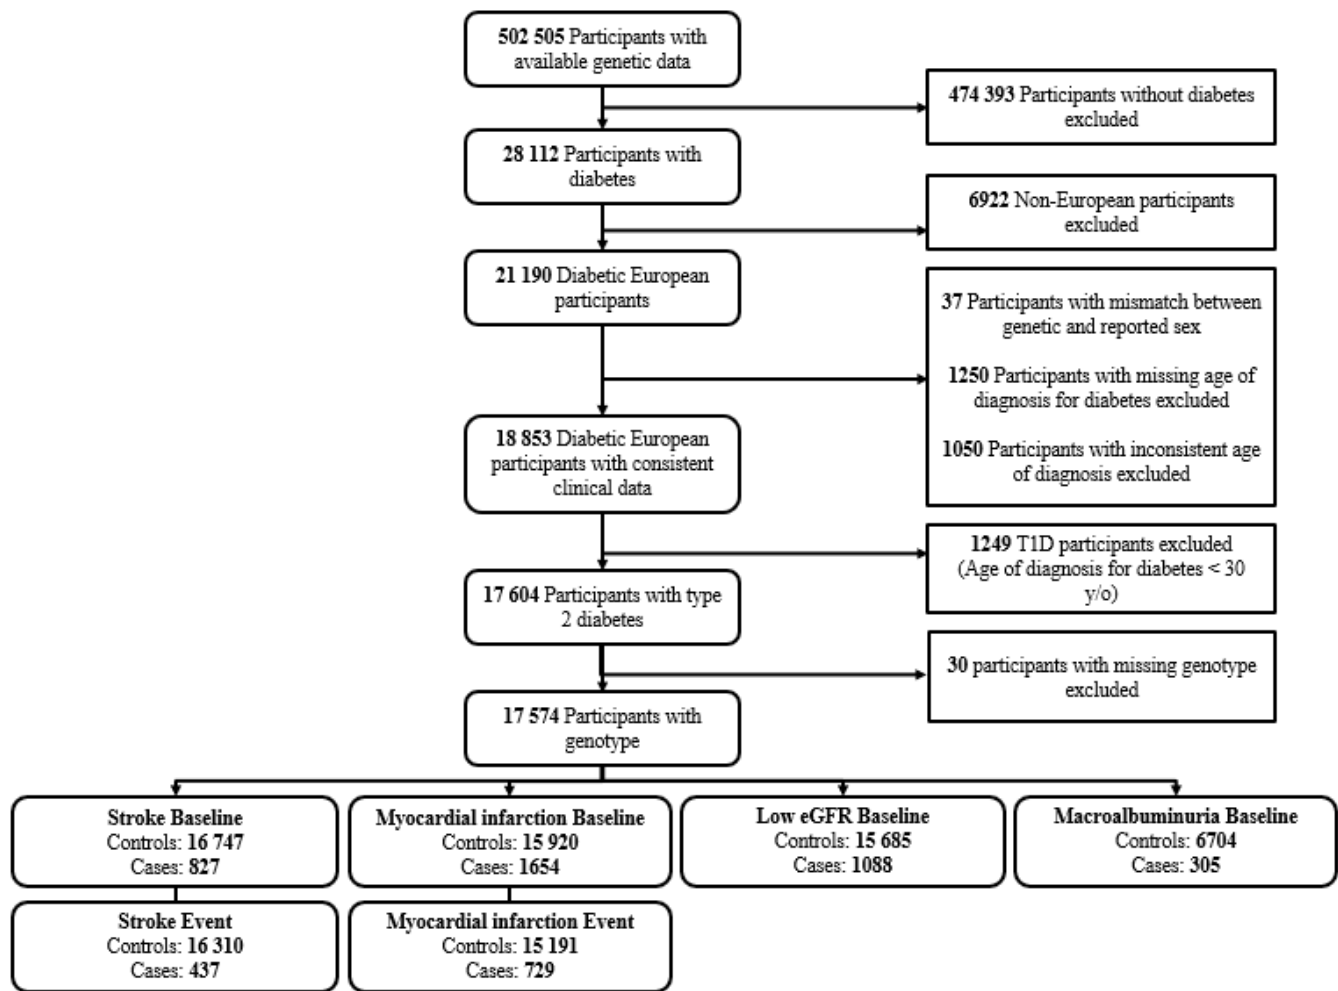

**ESM Fig. 1: Flow of selection of individuals with T2D of UK Biobank (UKBB) and number of cases and controls for stroke, myocardial infarction, low eGFR and macroalbuminuria analyses.**

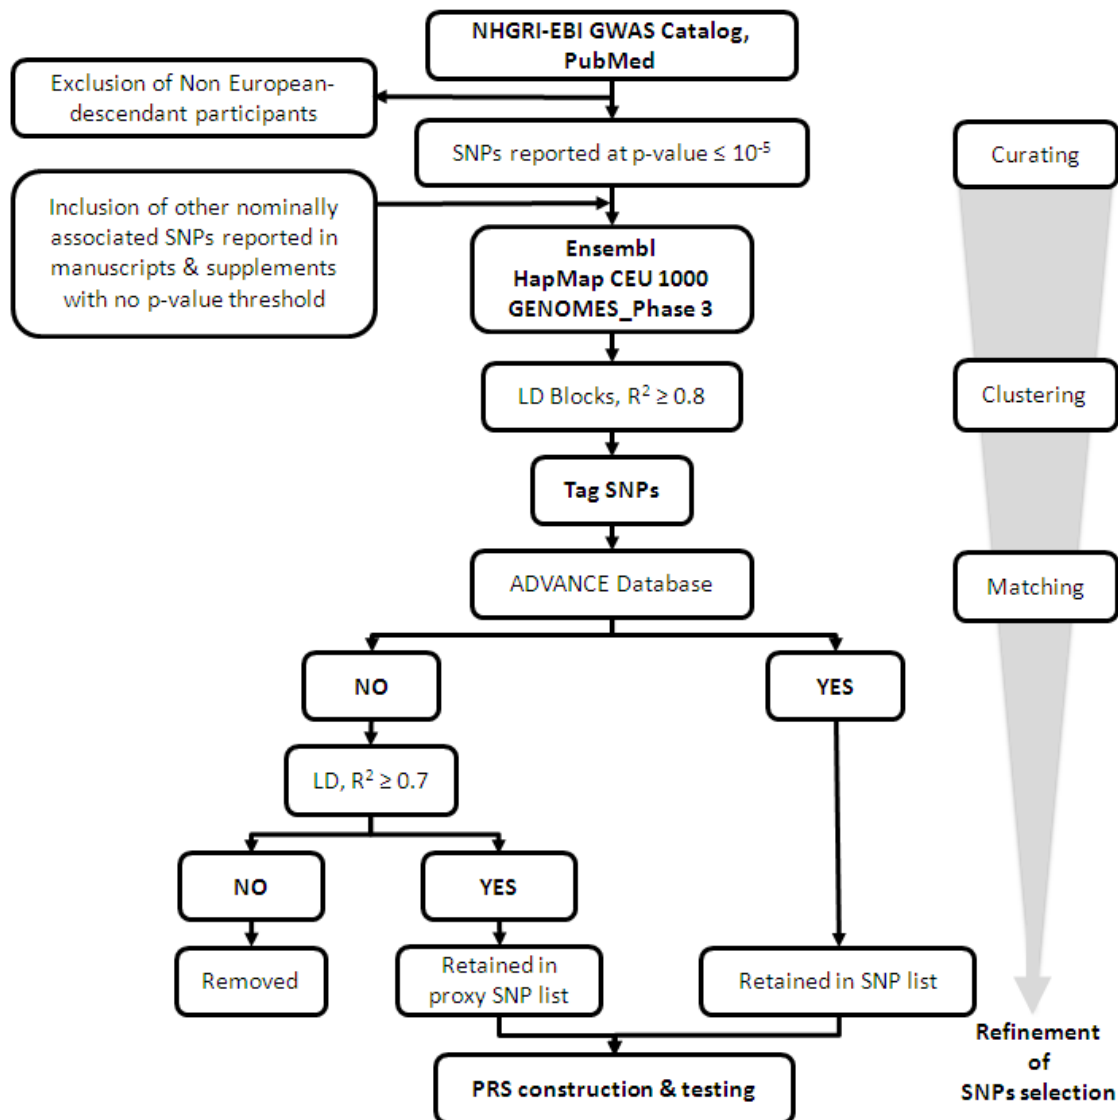

**ESM Fig. 2: Stepwise approach for selection of SNPs included in the 10 wPRS.**

SNP selection to construct the 10 wPRS integrates public-access resources including continuously updated database of GWAS results, NHGRI-EBI GWAS Catalog and PubMed. Curating consists of extraction of SNPs associated with one of the selected phenotypes at a given significance threshold from each GWAS and PubMed pertinent literature including only participants of European descent. Clustering: extracted SNPs are clustered according to patterns of linkage disequilibrium (LD) determined from HapMap CEU 1000 genomes reference population that matches the European population to yield a set of LD Blocks. Matching: Tag SNPs identified from LD blocks were used for matching with genotyped/imputed SNPs. SNPs retained are used for wPRS construction. **Abbreviation: NHGRI-EBI**

**GWAS catalog:** National human genome research institute–European bioinformatics institute catalog of published genome-wide association studies.

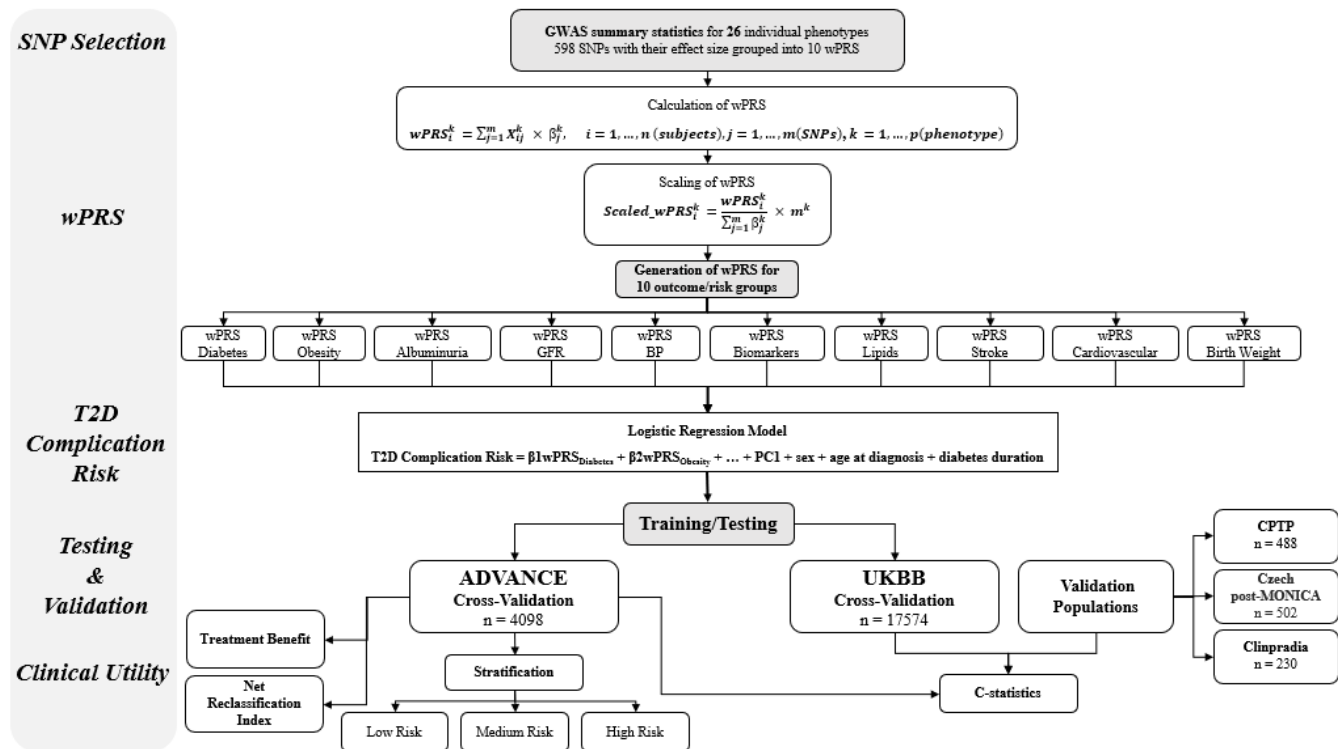

**ESM Fig. 3: Prediction model construction and testing in ADVANCE and UKBB and validation in three independent cohorts of patients with T2D.**

The prediction model was based on 10 wPRS. The logistic regression model that included the 10 wPRS, sex, PC1, age at onset of diabetes and its duration was tested in 4,098 participants of ADVANCE and 17,574 individuals with T2D of the UK Biobank after 10-fold cross-validation. The model was replicated in 488 individuals with T2D of CPTP, 230 individuals with T2D of Clinpradia and 502 individuals with pre-diabetes of Czech post-MONICA studies. Clinical utility was analyzed in ADVANCE trial.

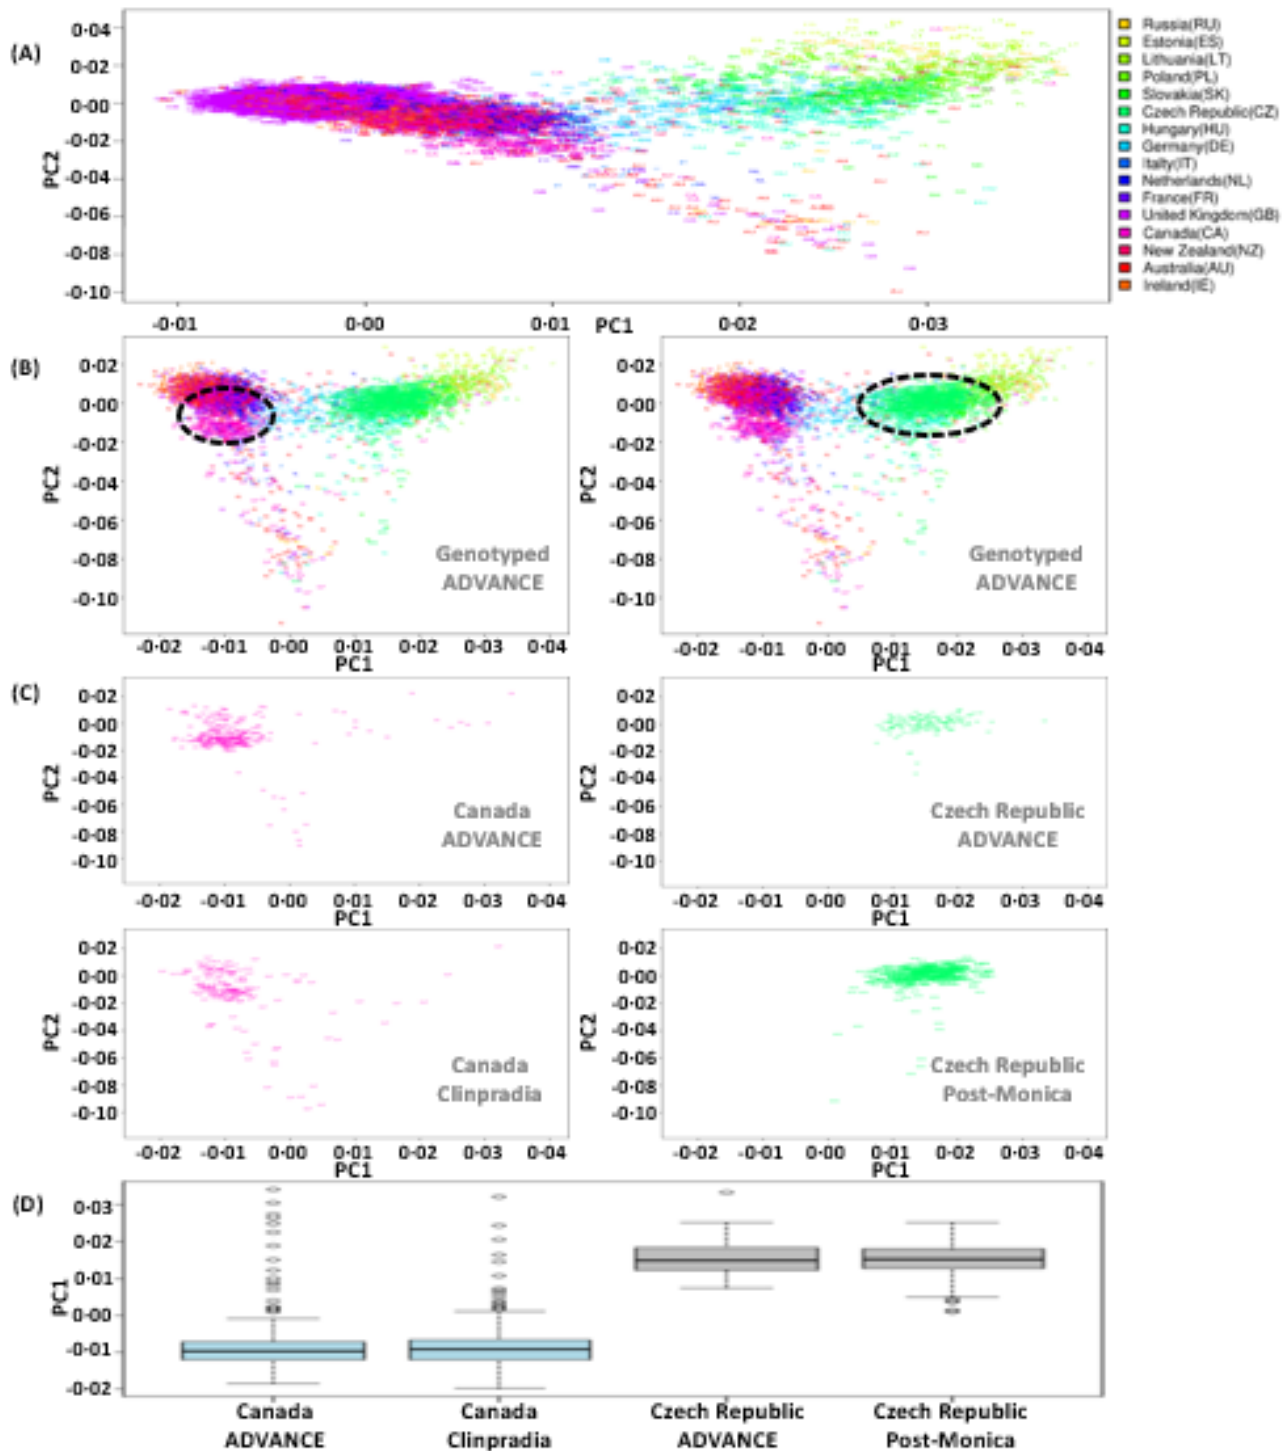

**ESM Fig. 4: Population structure of the study cohorts using principal component analysis projection.**

Principal components (PC) have been computed on ADVANCE individuals and all individuals from other cohorts were projected onto these principal components. (A) Projection of UKBB individuals on



ADVANCE PCs. **(B)** ADVANCE participants of Canadian (left) and Czech (right) origins are circled. **(C)** (Left) Distribution of participants from Clinpradia study performed in Canada and (Right) participants from Post-MONICA study performed in Czech Republic projected on ADVANCE PCs. **(D)** Box plots comparing mean PC1 values of participants in ADVANCE, Clinpradia and Post-Monica.

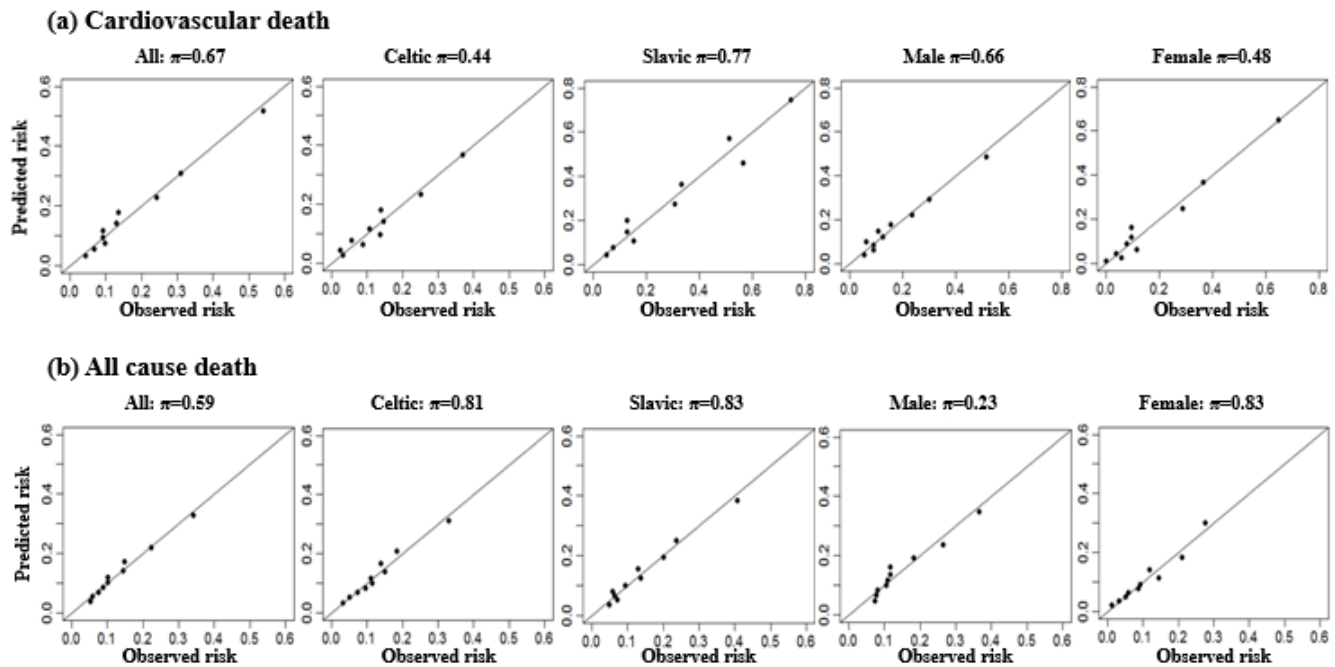

**ESM Fig. 5: Hosmer-Lemeshow test.**

Ethnic- and sex-specific calibration plots for the ADVANCE cardiovascular (a) and all cause death (b). The test is used to assess the goodness of fit for logistic regression models. The test assesses whether the observed event rates match expected event rates in subgroups of the model population. A value of  $\pi=1$  means that the expected and observed event rates in subgroups are similar. The subgroups are defined by sex and ethnicity as defined by PC1. The null hypothesis is that the observed event rates match expected event rates. The points in the graphs represent the deciles of fitted risk values.

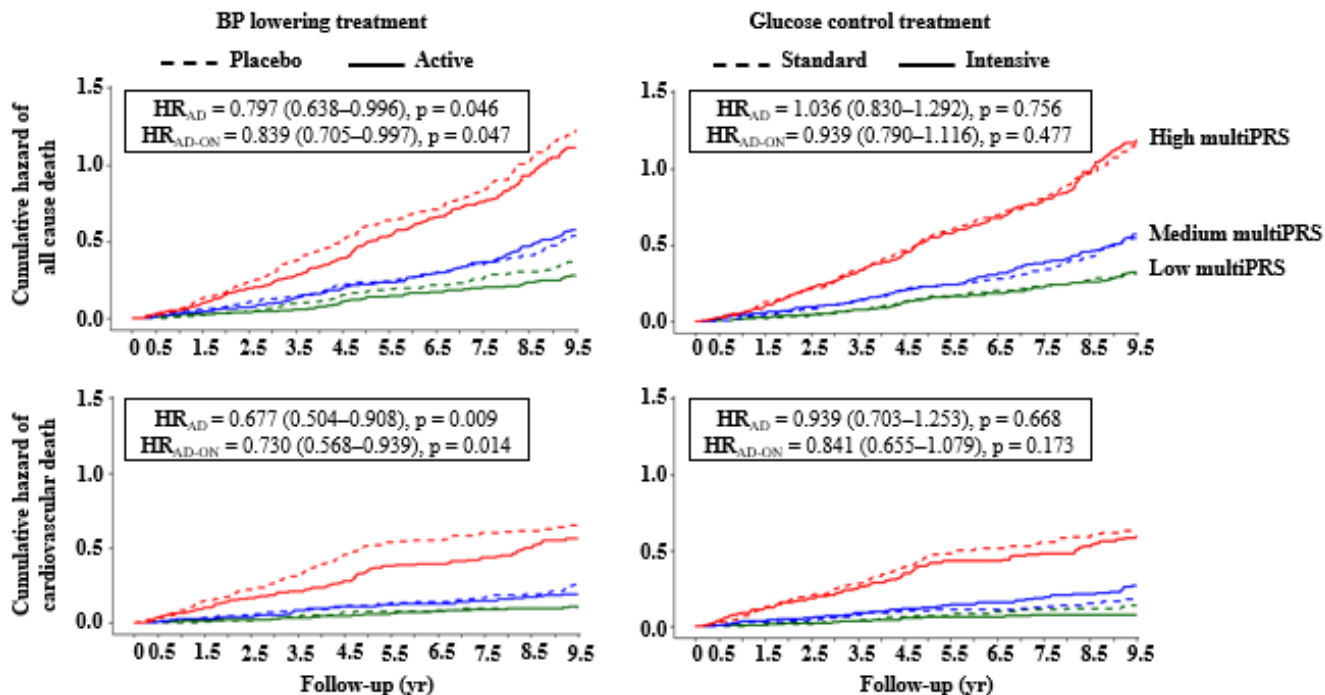

**ESM Fig. 6: Cumulative hazard plots of all cause and cardiovascular death stratified by multiPRS thirds in standard and intensive blood pressure (left) and glucose (right) treatment arms.**

Hazard ratio was analyzed by Cox proportional hazards regression analysis. Red: high multiPRS, blue: medium multiPRS, Green: low multiPRS. The control group includes normotensive subjects. HR indicated are for high multiPRS third. **Abbreviation: HR:** Hazard ratio, **AD:** ADVANCE trial, **AD-ON:** ADVANCE-ON follow-up.

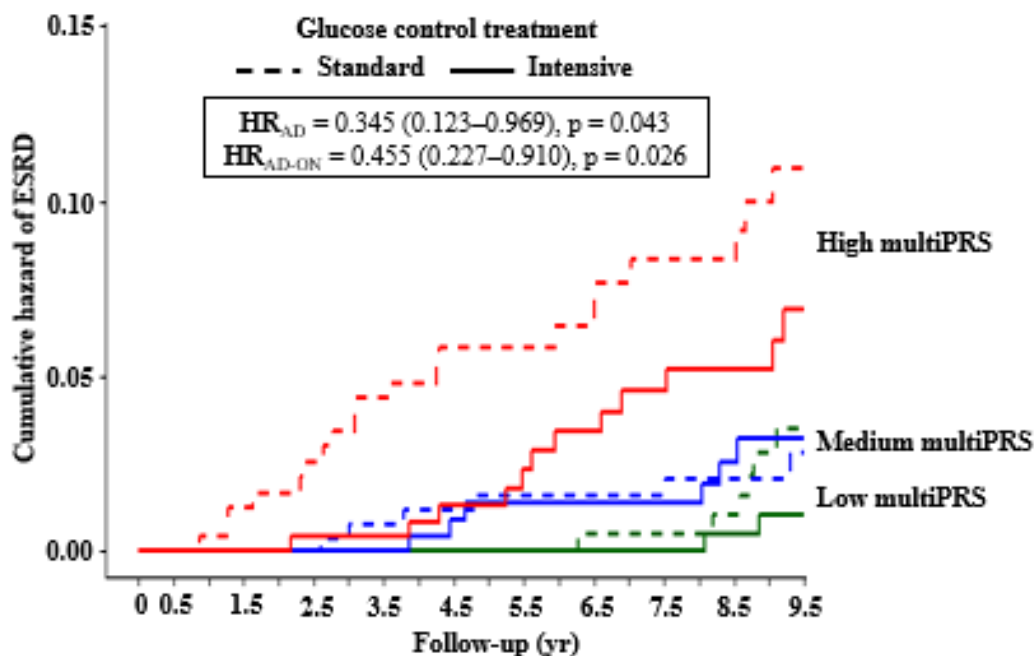

**ESM Fig. 7: Cumulative hazard plots of ESRD stratified by multiPRS thirds in standard and intensive glucose treatment arm.**

Hazard ratio was analyzed by Cox proportional hazards regression analysis. Red: high multiPRS, blue: medium multiPRS, Green: low multiPRS. The control group includes normotensive subjects. HR indicated are for high multiPRS third. **Abbreviation: HR:** Hazard ratio, **AD:** ADVANCE trial, **AD-ON:** ADVANCE-ON follow-up.

## Supplementary References

- 1 Euesden J, Lewis CM, O'Reilly PF. PRSice: Polygenic Risk Score software. *Bioinformatics* 2015;31:1466–8.
- 2 ADVANCE Management committee. Study Rationale and Design of ADVANCE: Action in Diabetes and Vascular disease - preterax and diamicron MR controlled evaluation. *Diabetologia* 2001;44:1118–20.
- 3 Sudlow C, Gallacher J, Allen N, et al. UK Biobank: An Open Access Resource for Identifying the Causes of a Wide Range of Complex Diseases of Middle and Old Age. *PLOS Med* 2015;12:e1001779.
- 4 Patel A, MacMahon S, Chalmers J, Neal B, Woodward M, Billot. Effects of a fixed combination of perindopril and indapamide on macrovascular and microvascular outcomes in patients with type 2 diabetes mellitus (the ADVANCE trial): a randomised controlled trial. *Lancet* 2007;370:829–40.
- 5 Zoungas S, de Galan BE, Ninomiya T, et al. Combined Effects of Routine Blood Pressure Lowering and Intensive Glucose Control on Macrovascular and Microvascular Outcomes in Patients With Type 2 Diabetes: New results from the ADVANCE trial. *Diabetes Care* 2009;32:2068–74.
- 6 Zoungas S, Chalmers J, Neal B, et al. Follow-up of Blood-Pressure Lowering and Glucose Control in Type 2 Diabetes. *N Engl J Med* 2014;371:1392–406.
- 7 Krajcoviechova A, Tremblay J, Wohlfahrt P, et al. The Impact of Blood Pressure and Visceral Adiposity on the Association of Serum Uric Acid With Albuminuria in Adults Without Full Metabolic Syndrome. *Am J Hypertens* 2016;29:1335–42.
- 8 Awadalla P, Boileau C, Payette Y, et al. Cohort profile of the CARTaGENE study: Quebec's population-based biobank for public health and personalized genomics. *Int J Epidemiol* 2013;42:1285–99.
- 9 Ibrahim-Verbaas CA, Fornage M, Bis JC, et al. Predicting Stroke Through Genetic Risk Functions. *Stroke* 2014;45:403–12.
- 10 R Core team. R: A language and environment for statistical computing. R foundation for statistical computing 2018.
- 11 Gregory R. Warnes, Bolker B, Bonebakker L, et al. gplots: Various R programming tools for plotting data, R package version 3.0.1 2016.
- 12 Dalgaard P. *Introductory statistics with R*. 2nd ed. 2008.
- 13 Robin X, Turck N, Hainard A, et al. pROC: an open-source package for R and S+ to analyze and compare ROC curves. *BMC Bioinformatics* 2011;12:77.
- 14 DeLong ER, DeLong DM, Clarke-Pearson DL. Comparing the Areas under Two or More Correlated Receiver Operating Characteristic Curves: A Nonparametric Approach. *Biometrics* 1988;44:837.
- 15 Hamet P, Haloui M, Harvey F, et al. PROX1 gene CC genotype as a major determinant of early onset of type 2 diabetes in slavic study participants from Action in Diabetes and Vascular Disease. *J Hypertens* 2017;35:S24–32.
- 16 Raj A, Stephens M, Pritchard JK. fastSTRUCTURE: Variational Inference of Population Structure in

- Large SNP Data Sets. *Genetics* 2014;197:573–89.
- 17 Purcell S, Neale B, Todd-Brown K, et al. PLINK: A Tool Set for Whole-Genome Association and Population-Based Linkage Analyses. *Am J Hum Genet* 2007;81:559–75.
- 18 Delaneau O, Marchini J, Zagury J-F. A linear complexity phasing method for thousands of genomes. *Nat Methods* 2012;9:179–81.
- 19 Howie BN, Donnelly P, Marchini J. A Flexible and Accurate Genotype Imputation Method for the Next Generation of Genome-Wide Association Studies. *PLoS Genet* 2009;5:e1000529.
- 20 [https://mathgen.stats.ox.ac.uk/impute/1000GP\\_Phase3.html](https://mathgen.stats.ox.ac.uk/impute/1000GP_Phase3.html).
- 21 Cunningham F, Amode MR, Barrell D, et al. Ensembl 2015. *Nucleic Acids Res* 2015;43:D662–9.
- 22 Southam L, Panoutsopoulou K, Rayner NW, et al. The effect of genome-wide association scan quality control on imputation outcome for common variants. *Eur J Hum Genet* 2011;19:610–4.
- 23 Price AL, Patterson NJ, Plenge RM, Weinblatt ME, Shadick NA, Reich D. Principal components analysis corrects for stratification in genome-wide association studies. *Nat Genet* 2006;38:904–9.
- 24 O’Seaghdha CM, Yang Q, Wu H, Hwang S-J, Fox CS. Performance of a Genetic Risk Score for CKD Stage 3 in the General Population. *Am J Kidney Dis* 2012;59:19–24.
- 25 Voight BF, Scott LJ, Steinthorsdottir V, et al. Twelve type 2 diabetes susceptibility loci identified through large-scale association analysis. *Nat Genet* 2010;42:579–89.
- 26 Soranzo N, Sanna S, Wheeler E, et al. Common Variants at 10 Genomic Loci Influence Hemoglobin A1C Levels via Glycemic and Nonglycemic Pathways. *Diabetes* 2010;59:3229–39.
- 27 Dupuis J, Langenberg C, Prokopenko I, et al. New genetic loci implicated in fasting glucose homeostasis and their impact on type 2 diabetes risk. *Nat Genet* 2010;42:105–16.
- 28 Qi L, Cornelis MC, Kraft P, et al. Genetic variants at 2q24 are associated with susceptibility to type 2 diabetes. *Hum Mol Genet* 2010;19:2706–15.
- 29 Zeggini E, Scott LJ, Saxena R, et al. Meta-analysis of genome-wide association data and large-scale replication identifies additional susceptibility loci for type 2 diabetes. *Nat Genet* 2008;40:638–45.
- 30 Paré G, Chasman DI, Parker AN, et al. Novel Association of HK1 with Glycated Hemoglobin in a Non-Diabetic Population: A Genome-Wide Evaluation of 14,618 Participants in the Women’s Genome Health Study. *PLoS Genet* 2008;4:e1000312.
- 31 Kong A, Steinthorsdottir V, Masson G, et al. Parental origin of sequence variants associated with complex diseases. *Nature* 2009;462:868–74.
- 32 Shungin D, Winkler TW, Croteau-Chonka DC, et al. New genetic loci link adipose and insulin biology to body fat distribution. *Nature* 2015;518:187–96.
- 33 Speliotes EK, Willer CJ, Berndt SI, et al. Association analyses of 249,796 individuals reveal 18 new loci associated with body mass index. *Nat Genet* 2010;42:937–48.

- 34 Heid IM, Jackson AU, Randall JC, et al. Meta-analysis identifies 13 new loci associated with waist-hip ratio and reveals sexual dimorphism in the genetic basis of fat distribution. *Nat Genet* 2010;42:949–60.
- 35 Lindgren CM, Heid IM, Randall JC, et al. Genome-Wide Association Scan Meta-Analysis Identifies Three Loci Influencing Adiposity and Fat Distribution. *PLoS Genet* 2009;5:e1000508.
- 36 Teumer A, Tin A, Sorice R, et al. Genome-wide Association Studies Identify Genetic Loci Associated With Albuminuria in Diabetes. *Diabetes* 2016;65:803–17.
- 37 Pattaro C, Teumer A, Gorski M, et al. Genetic associations at 53 loci highlight cell types and biological pathways relevant for kidney function. *Nat Commun* 2016;7:10023.
- 38 Köttgen A, Pattaro C, Böger CA, et al. New loci associated with kidney function and chronic kidney disease. *Nat Genet* 2010;42:376–84.
- 39 Chambers JC, Zhang W, Lord GM, et al. Genetic loci influencing kidney function and chronic kidney disease. *Nat Genet* 2010;42:373–5.
- 40 Köttgen A, Glazer NL, Dehghan A, et al. Multiple loci associated with indices of renal function and chronic kidney disease. *Nat Genet* 2009;41:712–7.
- 41 Gudbjartsson DF, Holm H, Indridason OS, et al. Association of Variants at UMOD with Chronic Kidney Disease and Kidney Stones—Role of Age and Comorbid Diseases. *PLoS Genet* 2010;6:e1001039.
- 42 International Consortium for Blood Pressure Genome-Wide Association Studies, Georg B Ehret, Patricia B Munroe, Kenneth M Rice, Murielle Bochud, Andrew D Johnson, Daniel I Chasman, Albert V Smith, Martin D Tobin, Germaine C Verwoert, Shih-Jen Hwang, Vasyl Pihur, Peter Vollenweider, Paul F O’Reilly, Najaf Amin, Jennifer L Bragg-Gres TJ. Genetic variants in novel pathways influence blood pressure and cardiovascular disease risk. *Nature* 2011;478:103–9.
- 43 Wain L V., Vaez A, Jansen R, et al. Novel Blood Pressure Locus and Gene Discovery Using Genome-Wide Association Study and Expression Data Sets From Blood and the Kidney. *Hypertension* 2017;70:e4–19.
- 44 Warren HR, Evangelou E, Cabrera CP, et al. Genome-wide association analysis identifies novel blood pressure loci and offers biological insights into cardiovascular risk. *Nat Genet* 2017;49:403–15.
- 45 Wain L V, Verwoert GC, O’Reilly PF, et al. Genome-wide association study identifies six new loci influencing pulse pressure and mean arterial pressure. *Nat Genet* 2011;43:1005–11.
- 46 Dehghan A, Dupuis J, Barbalic M, et al. Meta-Analysis of Genome-Wide Association Studies in >80 000 Subjects Identifies Multiple Loci for C-Reactive Protein Levels. *Circulation* 2011;123:731–8.
- 47 Dehghan A, Yang Q, Peters A, et al. Association of Novel Genetic Loci With Circulating Fibrinogen Levels. *Circ Cardiovasc Genet* 2009;2:125–33.
- 48 Teslovich TM, Musunuru K, Smith A V., et al. Biological, clinical and population relevance of 95 loci for blood lipids. *Nature* 2010;466:707–13.



- 49 Dichgans M, Malik R, König IR, et al. Shared Genetic Susceptibility to Ischemic Stroke and Coronary Artery Disease. *Stroke* 2014;45:24–36.
- 50 Myocardial Infarction Genetics, Kathiresan S, Voight B, et al. Genome-wide association of early-onset myocardial infarction with single nucleotide polymorphisms and copy number variants. *Nat Genet* 2009;41:334–41.
- 51 Nikpay M, Goel A, Won H, et al. A comprehensive 1000 Genomes–based genome-wide association meta-analysis of coronary artery disease. *Nat Genet* 2015;47:1121–30.
- 52 Nelson CP, Goel A, Butterworth AS, et al. Association analyses based on false discovery rate implicate new loci for coronary artery disease. *Nat Genet* 2017;49:1385–91.
- 53 Pulit SL, McArdle PF, Wong Q, et al. Loci associated with ischaemic stroke and its subtypes (SiGN): a genome-wide association study. *Lancet Neurol* 2016;15:174–84.
- 54 Ellinor PT, Lunetta KL, Glazer NL, et al. Common variants in *KCNN3* are associated with lone atrial fibrillation. *Nat Genet* 2010;42:240–4.
- 55 Cheng Y-C, Stanne TM, Giese A-K, et al. Genome-Wide Association Analysis of Young-Onset Stroke Identifies a Locus on Chromosome 10q25 Near *HABP2*. *Stroke* 2016;47:307–16.
- 56 Qi L, Qi Q, Prudente S, et al. Association Between a Genetic Variant Related to Glutamic Acid Metabolism and Coronary Heart Disease in Individuals With Type 2 Diabetes. *J Am Med Assoc* 2013;310:821–828.
- 57 Traylor M, Farrall M, Holliday EG, et al. Genetic risk factors for ischaemic stroke and its subtypes (the METASTROKE Collaboration): a meta-analysis of genome-wide association studies. *Lancet Neurol* 2012;11:951–62.
- 58 Benjamin EJ, Rice KM, Arking DE, et al. Variants in *ZFHX3* are associated with atrial fibrillation in individuals of European ancestry. *Nat Genet* 2009;41:879–81.
- 59 Bellenguez C, Bevan S, Gschwendtner A, et al. Genome-wide association study identifies a variant in *HDAC9* associated with large vessel ischemic stroke. *Nat Genet* 2012;44:328–33.
- 60 Dehghan A, Bis JC, White CC, et al. Genome-Wide Association Study for Incident Myocardial Infarction and Coronary Heart Disease in Prospective Cohort Studies: The CHARGE Consortium. *PLoS One* 2016;11:e0144997.
- 61 Holliday EG, Maguire JM, Evans T-J, et al. Common variants at 6p21.1 are associated with large artery atherosclerotic stroke. *Nat Genet* 2012;44:1147–51.
- 62 Matarín M, Brown WM, Scholz S, et al. A genome-wide genotyping study in patients with ischaemic stroke: initial analysis and data release. *Lancet Neurol* 2007;6:414–20.
- 63 Samani NJ, Erdmann J, Hall AS, et al. Genomewide Association Analysis of Coronary Artery Disease. *N Engl J Med* 2007;357:443–53.

- 64 Clarke R, Peden JF, Hopewell JC, et al. Genetic Variants Associated with Lp(a) Lipoprotein Level and Coronary Disease. *N Engl J Med* 2009;361:2518–28.
- 65 Foroud T, Lai D, Koller D, et al. Genome-Wide Association Study of Intracranial Aneurysm Identifies a New Association on Chromosome 7. *Stroke* 2014;45:3194–9.
- 66 Foroud T, Koller DL, Lai D, et al. Genome-Wide Association Study of Intracranial Aneurysms Confirms Role of Anril and SOX17 in Disease Risk. *Stroke* 2012;43:2846–52.
- 67 van Setten J, Isgum I, Smolonska J, et al. Genome-wide association study of coronary and aortic calcification implicates risk loci for coronary artery disease and myocardial infarction. *Atherosclerosis* 2013;228:400–5.
- 68 O’Donnell CJ, Kavousi M, Smith A V., et al. Genome-Wide Association Study for Coronary Artery Calcification With Follow-Up in Myocardial Infarction. *Circulation* 2011;124:2855–64.
- 69 Reilly MP, Li M, He J, et al. Identification of ADAMTS7 as a novel locus for coronary atherosclerosis and association of ABO with myocardial infarction in the presence of coronary atherosclerosis: two genome-wide association studies. *Lancet* 2011;377:383–92.
- 70 Ikram MA, Seshadri S, Bis JC, et al. Genomewide Association Studies of Stroke. *N Engl J Med* 2009;360:1718–28.
- 71 Horikoshi M, Beaumont RN, Day FR, et al. Genome-wide associations for birth weight and correlations with adult disease. *Nature* 2016;538:248–52.
